# Supplementary material for: Identification of Novel Multi-Omics Expression Landscapes and Meta-Analysis of Landscape-Based Competitive Endogenous RNA Networks in ALDH+ Lung Adenocarcinoma Stem Cells
Source: Preprints.org preprint supplement (doi:10.20944/preprints202201.0286.v1), 2022-01-20
Supplement: Supplementary file 1 [file Table_S1_Detailed information of miRNAs.xlsx]

## Sheet: miRNA_category_bin
Types	SC1	SC1(percent)	SC2	SC2(percent)	TC1	TC1(percent)	TC2	TC2(percent)
total	14276843	1	10954687	1	15868627	1	17057766	1
known_miRNA	5119594	0.3586	3560572	0.325	9270409	0.5842	9508082	0.5574
rRNA	168686	0.0118	521365	0.0476	68579	0.0043	88369	0.0052
tRNA	922088	0.0646	550383	0.0502	1285179	0.081	1719692	0.1008
snRNA	5887	0.0004	10168	0.0009	6856	0.0004	6472	0.0004
snoRNA	621501	0.0435	349569	0.0319	169176	0.0107	178064	0.0104
repeat	557944	0.0391	260643	0.0238	427746	0.027	639696	0.0375
novel_miRNA	1928	0.0001	1722	0.0002	1077	0.0001	1130	0.0001
exon:+	649706	0.0455	504667	0.0461	315860	0.0199	379499	0.0222
exon:-	70938	0.005	85742	0.0078	24358	0.0015	33819	0.002
intron:+	1602473	0.1122	1307153	0.1193	315370	0.0199	423323	0.0248
intron:-	70228	0.0049	147203	0.0134	43928	0.0028	45893	0.0027
other	4485870	0.3142	3655500	0.3337	3940089	0.2483	4033727	0.2365

## Sheet: miRNA_pearson_correlation
R^2	LSC1	LSC2	LTC1	LTC2
LSC1	1	0.905	0.887	0.891
LSC2	0.905	1	0.904	0.906
LTC1	0.887	0.904	1	0.99
LTC2	0.891	0.906	0.99	1

## Sheet: known-novel-miRNA
2656	1	hsa_miRNA
1379	0.519202	known_miRNA
100	0.0376506	novel_miRNA

## Sheet: lncRNA_pearson_correlation
Rho	LSC1	LSC2	LTC1	LTC2
LSC1	1	0.778	0.76	0.753
LSC2	0.778	1	0.76	0.765
LTC1	0.76	0.76	1	0.843
LTC2	0.753	0.765	0.843	1
Mapping ratio
Sample name	LSC1	LSC2	LTC1	LTC2
Total reads	89070006	79300862	89136976	87034984
Total mapped	83232483 (93.45%)	76152049 (96.03%)	85565466 (95.99%)	83604995 (96.06%)
