# Supplementary material for: Identification of Novel Multi-Omics Expression Landscapes and Meta-Analysis of Landscape-Based Competitive Endogenous RNA Networks in ALDH+ Lung Adenocarcinoma Stem Cells
Source: Preprints.org preprint supplement (doi:10.20944/preprints202201.0286.v1), 2022-01-20
Supplement: Supplementary file 2 [file Table_S2_Novel_lncRNA.xlsx]

## Sheet: Sheet1
Transcript_id	Gene_id	Official_Symbol	Gene_type	LSC1_FPKM	LSC2_FPKM	LTC1_FPKM	LTC2_FPKM
LNC_003902	XLOC_083971	--	lincRNA	16.6441	59.2554	14.6401	17.2063
LNC_003903	XLOC_083971	--	lincRNA	29.4435	24.4905	8.21471	12.8454
LNC_003900	XLOC_083904	--	lincRNA	0.569712	0.498291	0.483049	0.319883
LNC_003901	XLOC_083971	--	lincRNA	0	12.0735	0	0
LNC_003906	XLOC_083971	--	lincRNA	8.25674	2.89219	1.9216	4.6707
LNC_003907	XLOC_083971	--	lincRNA	4.03038	24.16	8.50396	8.7375
LNC_003904	XLOC_083971	--	lincRNA	65.1757	68.0401	66.2479	74.2704
LNC_003905	XLOC_083971	--	lincRNA	5.01753	3.54871	7.04967	4.31922
LNC_003908	XLOC_083973	--	lincRNA	4.89194	4.63381	5.29571	3.87716
LNC_003909	XLOC_084004	--	lincRNA	1.19783	3.34715	2.04342	2.29379
LNC_000256	XLOC_003649	--	intronic_lncRNA	0.157334	0.247018	0.281184	0.594237
LNC_000109	XLOC_000943	--	intronic_lncRNA	0	1.36098	0.090514	0.130407
LNC_000108	XLOC_000943	--	intronic_lncRNA	0.672862	0.033658	0.766941	0.697389
LNC_000103	XLOC_000816	--	lincRNA	0.031524	0.104182	0.475317	0.269686
LNC_000102	XLOC_000793	--	lincRNA	0.083111	1.24069	0.098256	0.006038
LNC_000101	XLOC_000793	--	lincRNA	0.709893	1.44477	0.546507	0.192996
LNC_000100	XLOC_000780	--	lincRNA	0	0.534336	0	0
LNC_000107	XLOC_000902	--	intronic_lncRNA	0.918649	0.732368	0.920879	1.59932
LNC_000106	XLOC_000890	--	intronic_lncRNA	0.4166	0.252501	0.088571	0.455195
LNC_000105	XLOC_000855	--	lincRNA	0	0.402829	0.648651	0.513813
LNC_000104	XLOC_000852	--	lincRNA	0	0	0.410588	0.219308
LNC_004275	XLOC_092912	--	intronic_lncRNA	0.429	0.167635	0.415479	0.296182
LNC_004274	XLOC_092908	--	intronic_lncRNA	0.439429	0.087258	0.284039	0.410855
LNC_000819	XLOC_017259	--	intronic_lncRNA	0.375555	0	0.495455	0.257717
LNC_000818	XLOC_017246	--	intronic_lncRNA	0.095479	0.437402	0.36598	0.972322
LNC_001432	XLOC_031237	--	intronic_lncRNA	0.698714	0.157607	0.606287	0.50764
LNC_001433	XLOC_031238	--	intronic_lncRNA	0.238601	0.937695	0.239319	0.46773
LNC_001434	XLOC_031242	--	intronic_lncRNA	0	0	0.910668	0
LNC_001435	XLOC_031242	--	intronic_lncRNA	1.02096	0.811752	0.469154	0
LNC_001436	XLOC_031242	--	intronic_lncRNA	0.147964	0.51725	0.527591	1.54654
LNC_001437	XLOC_031253	--	intronic_lncRNA	0.787274	0.444026	0.349925	0.421194
LNC_000811	XLOC_017137	--	intronic_lncRNA	0.653676	0.564196	1.04096	0.852058
LNC_000810	XLOC_017077	--	intronic_lncRNA	0.359217	0.291737	0.71346	0.779576
LNC_000813	XLOC_017187	--	antisense_lncRNA	0	0.954509	0.728342	0.249159
LNC_000812	XLOC_017170	--	intronic_lncRNA	0.35493	0.261768	0.586095	0.832423
LNC_000815	XLOC_017200	--	intronic_lncRNA	0.635793	0.22656	0.403415	0.66042
LNC_000814	XLOC_017199	--	intronic_lncRNA	0.505814	0.063111	0.076667	0.195416
LNC_000817	XLOC_017246	--	intronic_lncRNA	0.23817	0.467972	0.18338	0.547496
LNC_000816	XLOC_017215	--	intronic_lncRNA	0.367067	0.520191	0.973612	0.934273
LNC_006112	XLOC_146072	--	intronic_lncRNA	0	0	0	0.419314
LNC_006113	XLOC_146170	--	lincRNA	0.134692	0	0.527516	0.108551
LNC_006110	XLOC_146038	--	intronic_lncRNA	0.619521	0.628703	0.420828	0.592349
LNC_004482	XLOC_098423	--	intronic_lncRNA	0.78909	0.13122	0	0
LNC_004483	XLOC_098425	--	intronic_lncRNA	0.103169	0.869252	0.08964	0.078571
LNC_004480	XLOC_098380	--	intronic_lncRNA	0.445615	0.190162	0.23768	0.59384
LNC_004481	XLOC_098400	--	intronic_lncRNA	0.356068	0.353137	0.695263	0.626376
LNC_004486	XLOC_098432	--	intronic_lncRNA	0.040524	0.578018	0.121274	0.783697
LNC_004487	XLOC_098438	--	intronic_lncRNA	0.508033	0.380171	0.220609	0.735642
LNC_004484	XLOC_098426	--	intronic_lncRNA	0.145688	0.817417	0	0
LNC_004485	XLOC_098432	--	intronic_lncRNA	1.3996	0.965427	1.10308	1.08533
LNC_006116	XLOC_146177	--	intronic_lncRNA	0.394115	0.953203	0.186466	0.787532
LNC_004488	XLOC_098439	--	intronic_lncRNA	0	0	0.725425	0.261108
LNC_004489	XLOC_098451	--	intronic_lncRNA	0.079966	0	0.452316	0.102316
LNC_006117	XLOC_146281	--	intronic_lncRNA	1.08761	0.374547	1.35488	1.45053
LNC_006035	XLOC_143568	--	intronic_lncRNA	0.587514	0.451542	0.602766	0.609136
LNC_006114	XLOC_146176	--	intronic_lncRNA	0.568936	0.232239	0.783235	0.969988
LNC_006034	XLOC_143567	--	intronic_lncRNA	0.645175	0.62485	0.795415	0.689374
LNC_006115	XLOC_146176	--	intronic_lncRNA	0.187837	0.646117	0.350852	0.302922
LNC_006037	XLOC_143719	--	intronic_lncRNA	0	0.869809	1.05242	0.905647
LNC_006036	XLOC_143695	--	intronic_lncRNA	0.089711	0	0.079676	0.336739
LNC_006031	XLOC_143468	--	intronic_lncRNA	0.319612	0.438134	0.628768	0.888764
LNC_006030	XLOC_143466	--	intronic_lncRNA	1.31977	1.95874	0.916184	1.95639
LNC_006033	XLOC_143552	--	intronic_lncRNA	0.886209	0.524742	0.666447	0.901274
LNC_005035	XLOC_114862	--	intronic_lncRNA	0.517869	0.693117	0.407572	0.507172
LNC_006032	XLOC_143550	--	intronic_lncRNA	0.918395	1.73645	0.412518	0.806666
LNC_003289	XLOC_075151	--	lincRNA	3.58414	1.29478	0.541558	0.35679
LNC_003288	XLOC_075151	--	lincRNA	0.770776	0.819297	0.344759	0.415489
LNC_003281	XLOC_075147	--	lincRNA	1.75919	1.1524	0.095854	0.541253
LNC_003280	XLOC_075145	--	lincRNA	0.79071	4.00739	1.40779	2.5967
LNC_003283	XLOC_075149	--	lincRNA	1.53221	1.18158	1.69483	1.33827
LNC_003282	XLOC_075148	--	lincRNA	2.91087	2.24116	0.23945	0.665901
LNC_003285	XLOC_075151	--	lincRNA	3.89745	1.50998	0.640755	1.05094
LNC_003284	XLOC_075149	--	lincRNA	5.7178	2.17625	1.30892	1.65701
LNC_003287	XLOC_075151	--	lincRNA	3.53422	1.72997	0.246762	0.866869
LNC_003286	XLOC_075151	--	lincRNA	1.53306	0.058047	0.255316	0.137942
LNC_000741	XLOC_015110	--	intronic_lncRNA	0.640658	0.453277	0.656661	0.916121
LNC_000740	XLOC_015104	--	intronic_lncRNA	0.475165	0.208012	0.216963	0.349821
LNC_000743	XLOC_015155	--	intronic_lncRNA	0.551557	0	1.20359	0.525827
LNC_000742	XLOC_015138	--	intronic_lncRNA	0	0	0	0.516079
LNC_000745	XLOC_015259	--	intronic_lncRNA	0.456658	0.459513	0.627566	0.54022
LNC_000744	XLOC_015216	--	intronic_lncRNA	0	0	0.689156	0.533409
LNC_000747	XLOC_015286	--	intronic_lncRNA	0.299319	0.410484	0.116177	0.091368
LNC_000746	XLOC_015285	--	intronic_lncRNA	0.675216	0.464013	0.522309	1.06187
LNC_000749	XLOC_015343	--	antisense_lncRNA	0.548393	0	0	0
LNC_000748	XLOC_015342	--	intronic_lncRNA	0.281128	0.166511	0.407265	0
LNC_005999	XLOC_142636	--	intronic_lncRNA	0	0.502159	0	0
LNC_005998	XLOC_142633	--	intronic_lncRNA	0.298757	0	0.524432	0
LNC_002523	XLOC_058479	--	intronic_lncRNA	0.75373	1.33403	0.538482	0.754534
LNC_002522	XLOC_058466	--	intronic_lncRNA	4.94332	3.05419	5.58407	3.71097
LNC_002521	XLOC_058466	--	intronic_lncRNA	3.16588	3.06401	3.10463	3.55388
LNC_002520	XLOC_058462	--	intronic_lncRNA	0.533515	0.409846	1.06814	0.940242
LNC_002527	XLOC_058541	--	intronic_lncRNA	0.523125	0.238845	1.27861	0.269134
LNC_002526	XLOC_058539	--	intronic_lncRNA	0.870557	0.148236	0.364576	0.622115
LNC_002525	XLOC_058502	--	intronic_lncRNA	0.330769	0.310624	0.80631	0.377617
LNC_002524	XLOC_058480	--	intronic_lncRNA	0.342132	0.338117	0.646511	0.619016
LNC_002529	XLOC_058593	--	intronic_lncRNA	0.629636	0.28412	0.423863	0.826696
LNC_002528	XLOC_058562	--	intronic_lncRNA	0.983154	1.20064	0.369507	0.563368
LNC_003133	XLOC_072257	--	intronic_lncRNA	0.497625	0.506341	0.562061	0.871316
LNC_003132	XLOC_072248	--	intronic_lncRNA	0	0	1.71457	5.18731
LNC_003131	XLOC_072248	--	intronic_lncRNA	1.94388	2.53673	11.0979	8.43048
LNC_003130	XLOC_072243	--	intronic_lncRNA	0.347596	0	0.26146	1.03369
LNC_003137	XLOC_072363	--	intronic_lncRNA	0.522319	0.242099	0.498125	0.618318
LNC_003136	XLOC_072312	--	intronic_lncRNA	0.971139	0.553693	0.464481	0.645604
LNC_003135	XLOC_072264	--	antisense_lncRNA	0.917028	0.066191	0.19492	0.625142
LNC_003134	XLOC_072263	--	intronic_lncRNA	0.126358	0	0.451249	0
LNC_003139	XLOC_072400	--	lincRNA	0.821728	0.184474	0.061378	0.091693
LNC_003138	XLOC_072382	--	antisense_lncRNA	0.400354	0.358377	0.277692	0.724378
LNC_005199	XLOC_118864	--	intronic_lncRNA	0.152172	0	0.16696	0.859762
LNC_005198	XLOC_118850	--	intronic_lncRNA	0.294434	0.461644	0.473791	0.407784
LNC_005193	XLOC_118716	--	intronic_lncRNA	0.951264	0.311482	0.537999	0.547206
LNC_005192	XLOC_118666	--	intronic_lncRNA	0.640547	0.079889	0	0.064688
LNC_005191	XLOC_118665	--	intronic_lncRNA	0.590748	0.264062	0.281955	0.095454
LNC_005190	XLOC_118664	--	intronic_lncRNA	0	0	0.491331	0
LNC_005197	XLOC_118846	--	intronic_lncRNA	0.214897	0.320908	0.516308	0
LNC_005196	XLOC_118845	--	intronic_lncRNA	0.125279	0.499994	0	0
LNC_005195	XLOC_118716	--	intronic_lncRNA	0	0.637442	0	0
LNC_005194	XLOC_118716	--	intronic_lncRNA	0.683443	0.405064	0.262598	0.820118
LNC_002428	XLOC_056132	--	intronic_lncRNA	0.352281	0.064731	0.467791	0.491209
LNC_002429	XLOC_056209	--	intronic_lncRNA	1.13238	1.19342	1.45214	0.943068
LNC_002426	XLOC_056089	--	intronic_lncRNA	0.917836	0	0.37632	0
LNC_002427	XLOC_056091	--	intronic_lncRNA	0.823234	0.199453	0	0
LNC_002424	XLOC_055973	--	intronic_lncRNA	0.628361	0.470735	0.688691	0.59868
LNC_002425	XLOC_056069	--	intronic_lncRNA	0.291665	0.210051	0.462316	0.350272
LNC_002422	XLOC_055938	--	lincRNA	0.192429	0	1.04201	1.4564
LNC_002423	XLOC_055973	--	intronic_lncRNA	0.862978	1.07968	0.815931	1.33527
LNC_002420	XLOC_055936	--	intronic_lncRNA	3.85614	2.29069	4.83487	5.55436
LNC_002421	XLOC_055937	--	intronic_lncRNA	0	0	0.281077	0.793744
LNC_005429	XLOC_125321	--	intronic_lncRNA	0.396926	0.398897	0.834149	0.940439
LNC_005428	XLOC_125267	--	intronic_lncRNA	0.556797	0	0	0
LNC_005423	XLOC_125164	--	intronic_lncRNA	0.536889	0.611399	0.867464	0.781151
LNC_005422	XLOC_125145	--	intronic_lncRNA	0.050076	0.016394	0.618161	0.063705
LNC_005421	XLOC_125142	--	intronic_lncRNA	0.309008	0.134918	0.798745	0.688706
LNC_005420	XLOC_125101	--	intronic_lncRNA	0.471876	0.212806	0.950535	0.786748
LNC_005427	XLOC_125259	--	intronic_lncRNA	0.458063	0.484316	1.48374	0.371352
LNC_005426	XLOC_125223	--	intronic_lncRNA	3.23479	4.09497	1.9533	4.05862
LNC_005425	XLOC_125203	--	intronic_lncRNA	0.811565	0.525597	0.506078	0.607592
LNC_005424	XLOC_125172	--	intronic_lncRNA	0.245655	0.195379	1.11696	0.605281
LNC_004248	XLOC_092122	--	intronic_lncRNA	0.537177	0.479114	0.5563	1.11027
LNC_004249	XLOC_092152	--	lincRNA	0.078305	0.113588	0.716526	0.175407
LNC_004240	XLOC_091856	--	intronic_lncRNA	0	0.600225	0.682752	0.657019
LNC_004241	XLOC_091878	--	intronic_lncRNA	0.358008	0.703022	0.662796	0.574201
LNC_004242	XLOC_091879	--	intronic_lncRNA	0.255185	0.095808	0.544749	0.127429
LNC_004243	XLOC_091888	--	intronic_lncRNA	0	0.536118	0.604132	0.198008
LNC_004244	XLOC_092001	--	intronic_lncRNA	1.63888	0.37923	1.00445	1.50253
LNC_004245	XLOC_092055	--	intronic_lncRNA	0.317011	0	0.167568	0.399081
LNC_004246	XLOC_092098	--	intronic_lncRNA	0.681767	0.453964	0.682933	0.517552
LNC_004247	XLOC_092111	--	intronic_lncRNA	0.343646	0.722423	0.210558	0.594508
LNC_001199	XLOC_025914	--	intronic_lncRNA	0.754808	0.835657	0.223055	0.898771
LNC_001198	XLOC_025914	--	intronic_lncRNA	0.412876	0.455599	1.58242	0.020419
LNC_001197	XLOC_025907	--	lincRNA	0.360895	44.6023	10.5794	23.8179
LNC_001196	XLOC_025907	--	lincRNA	76.2245	21.7211	128.586	99.1542
LNC_001195	XLOC_025907	--	lincRNA	52.8925	27.5653	0	0
LNC_001194	XLOC_025898	--	lincRNA	0	2.32466	0	0
LNC_001193	XLOC_025883	--	intronic_lncRNA	0.640988	1.19691	0.472418	0.987858
LNC_001192	XLOC_025855	--	intronic_lncRNA	0	0.211721	0.410588	0.106326
LNC_001191	XLOC_025854	--	intronic_lncRNA	1.12873	0	0.133119	0
LNC_001190	XLOC_025841	--	intronic_lncRNA	0.557956	1.55889	1.39889	1.26877
LNC_000113	XLOC_000964	--	intronic_lncRNA	0.20054	0.880603	0	0
LNC_004107	XLOC_088661	--	intronic_lncRNA	0.566985	0.543732	0.288355	0.728408
LNC_004106	XLOC_088655	--	intronic_lncRNA	0.094983	0.177786	0.460503	0.054129
LNC_004105	XLOC_088653	--	intronic_lncRNA	4.71486	4.27628	4.41771	4.20617
LNC_004104	XLOC_088652	--	intronic_lncRNA	0.091766	0.561613	0.041348	0.045199
LNC_004103	XLOC_088651	--	intronic_lncRNA	0	0	0	0.438908
LNC_004102	XLOC_088649	--	intronic_lncRNA	0	0.385491	0.36129	0.760425
LNC_004101	XLOC_088648	--	intronic_lncRNA	0.57935	0.078775	0	0.471429
LNC_004100	XLOC_088647	--	intronic_lncRNA	0	0.711864	0	0.361887
LNC_004109	XLOC_088664	--	intronic_lncRNA	1.02499	0.558282	0.939537	0.702522
LNC_004108	XLOC_088662	--	intronic_lncRNA	0.448862	0.676024	0.752534	0.345204
LNC_001997	XLOC_045167	--	intronic_lncRNA	0.54321	0.402569	0.627487	0.529563
LNC_001996	XLOC_045166	--	intronic_lncRNA	0.879543	0.358231	0.977801	0.460423
LNC_001995	XLOC_045150	--	intronic_lncRNA	0.969406	0.420935	0.926408	1.59231
LNC_001994	XLOC_045107	--	intronic_lncRNA	0.79235	0.841757	1.12017	1.38005
LNC_001993	XLOC_045094	--	lincRNA	0.046917	0	0.31806	0.643359
LNC_001992	XLOC_045048	--	intronic_lncRNA	0	0.185713	0.517446	0.811014
LNC_001991	XLOC_044980	--	intronic_lncRNA	0.612792	0	0.104012	0
LNC_001990	XLOC_044878	--	intronic_lncRNA	0.604827	0.755486	0.434235	0.339745
LNC_001999	XLOC_045181	--	intronic_lncRNA	0	0	0.399755	0
LNC_001998	XLOC_045175	--	intronic_lncRNA	0.926633	1.07493	0.795373	0.540908
LNC_003739	XLOC_080266	--	intronic_lncRNA	0.458067	0.608367	0.486947	0.736094
LNC_003738	XLOC_080251	--	intronic_lncRNA	0.506358	0.157811	0.7776	0.866245
LNC_003731	XLOC_080084	--	intronic_lncRNA	1.49245	3.62274	0	0
LNC_003730	XLOC_080047	--	lincRNA	2.51563	1.1813	0.364843	0.317805
LNC_003733	XLOC_080090	--	intronic_lncRNA	0	0.208652	0.17725	0.430643
LNC_003732	XLOC_080086	--	lincRNA	0.67352	0	0	0
LNC_003735	XLOC_080216	--	intronic_lncRNA	0.541324	0.47181	0.631433	0.556117
LNC_003734	XLOC_080141	--	lincRNA	0	0.211134	0.5133	0.301046
LNC_003737	XLOC_080226	--	intronic_lncRNA	0.222309	0.552719	0.405156	0.48769
LNC_003736	XLOC_080216	--	intronic_lncRNA	0.095109	0.158426	0.012844	0.351163
LNC_003454	XLOC_075227	--	lincRNA	1.15894	0.053358	0	0.132619
LNC_003455	XLOC_075229	--	lincRNA	2.46974	1.66156	0.554801	0.98686
LNC_003456	XLOC_075230	--	lincRNA	1.27804	1.4696	0.39206	0.704828
LNC_003457	XLOC_075230	--	lincRNA	2.24777	0.035531	0.064421	0.038193
LNC_003450	XLOC_075227	--	lincRNA	0.482137	1.23303	0.185501	0.073102
LNC_003451	XLOC_075227	--	lincRNA	1.11583	0.232594	0.006675	0.639126
LNC_003452	XLOC_075227	--	lincRNA	0.958403	1.0856	0.291098	1.36572
LNC_003453	XLOC_075227	--	lincRNA	1.66046	0.71434	0.578396	0.410673
LNC_003458	XLOC_075231	--	lincRNA	4.91519	1.84125	2.22956	2.16026
LNC_003459	XLOC_075232	--	lincRNA	1.44712	1.06201	0.227823	0.357815
LNC_005676	XLOC_132516	--	intronic_lncRNA	0.255585	0.059055	0.114665	0.256998
LNC_005677	XLOC_132533	--	intronic_lncRNA	0.903178	0.809194	0.412172	0.634746
LNC_005674	XLOC_132509	--	intronic_lncRNA	0.835233	0	0	0
LNC_005675	XLOC_132513	--	intronic_lncRNA	0.182175	0.243452	0.474282	0.368607
LNC_005672	XLOC_132460	--	intronic_lncRNA	0.884885	0.120094	0.315507	0.058804
LNC_005673	XLOC_132480	--	lincRNA	0.107896	0.419978	0.352221	0.598382
LNC_005670	XLOC_132431	--	intronic_lncRNA	0.521236	0.14529	0.752611	0.709628
LNC_005671	XLOC_132431	--	intronic_lncRNA	0	0.133484	0	0
LNC_005678	XLOC_132533	--	intronic_lncRNA	0.510994	0.044458	0.047239	0.027756
LNC_005679	XLOC_132533	--	intronic_lncRNA	1.06281	0	0.641976	0.358714
LNC_005372	XLOC_123539	--	intronic_lncRNA	0.815387	0.649057	0.031166	0.375414
LNC_001609	XLOC_035074	--	intronic_lncRNA	0.460011	0.413209	0.280729	0.105812
LNC_001608	XLOC_035057	--	lincRNA	0.570814	0.147765	0.396485	0.349329
LNC_001607	XLOC_035049	--	intronic_lncRNA	1.67193	1.29765	2.05014	1.85955
LNC_001606	XLOC_035043	--	intronic_lncRNA	0.648286	0.215611	0	0.087292
LNC_001605	XLOC_034900	--	intronic_lncRNA	0.713491	0.714301	0.401798	0.580822
LNC_001604	XLOC_034897	--	intronic_lncRNA	0.200971	0.002074	0.36005	0.94145
LNC_001603	XLOC_034897	--	intronic_lncRNA	0.952019	0.379815	0.378886	0.336952
LNC_001602	XLOC_034870	--	intronic_lncRNA	0.679962	0.250737	0.459723	0.718565
LNC_001601	XLOC_034772	--	intronic_lncRNA	0.638787	0.152579	0.122435	0.164381
LNC_001600	XLOC_034770	--	intronic_lncRNA	0.067612	0.203506	0.845483	0.253601
LNC_005139	XLOC_117363	--	intronic_lncRNA	0.867535	0.871656	0.602509	0.774488
LNC_000458	XLOC_008145	--	intronic_lncRNA	0.249779	0.116221	0.474302	0.397298
LNC_005078	XLOC_115893	--	lincRNA	1.70858	1.17134	0	0.040243
LNC_005079	XLOC_115946	--	intronic_lncRNA	0.382598	0.164072	0.791713	0.550007
LNC_000554	XLOC_010310	--	intronic_lncRNA	0.170023	0.072977	0.557281	0.37125
LNC_000555	XLOC_010349	--	intronic_lncRNA	0.519802	0	0	0.34449
LNC_000556	XLOC_010449	--	intronic_lncRNA	0.548393	0.225249	0	0.326379
LNC_000557	XLOC_010457	--	intronic_lncRNA	0.851811	0.407437	0.281716	0.520098
LNC_000550	XLOC_010192	--	intronic_lncRNA	0.116871	0	0	0.489348
LNC_005071	XLOC_115731	--	intronic_lncRNA	0.453342	0.135339	1.25344	0.752898
LNC_000552	XLOC_010240	--	antisense_lncRNA	0	0	0	0.578101
LNC_000553	XLOC_010286	--	intronic_lncRNA	0.328534	0.167386	0.101669	0.576253
LNC_000451	XLOC_007936	--	intronic_lncRNA	0.490437	0.23727	0.313219	0.563612
LNC_000450	XLOC_007921	--	antisense_lncRNA	0.377269	0.505437	0.057542	0
LNC_005133	XLOC_117255	--	intronic_lncRNA	0.445715	0.491817	0.266126	0.456771
LNC_005132	XLOC_117252	--	intronic_lncRNA	0.33231	0.117085	0.806211	0.461964
LNC_000455	XLOC_008029	--	intronic_lncRNA	0.295074	0.353725	0.55078	0
LNC_000454	XLOC_008010	--	lincRNA	0.205568	0	0.244001	0.699542
LNC_003924	XLOC_084604	--	intronic_lncRNA	0.462634	0.224804	0	0.525454
LNC_003925	XLOC_084607	--	intronic_lncRNA	0.077168	0	0	0.408652
LNC_003926	XLOC_084608	--	intronic_lncRNA	0.192331	0.34004	0	0.594816
LNC_003927	XLOC_084609	--	intronic_lncRNA	1.04633	0.451266	0.338532	0.411233
LNC_003920	XLOC_084510	--	intronic_lncRNA	0.388178	0.193654	0.233419	0.235208
LNC_005137	XLOC_117294	--	intronic_lncRNA	0.385839	0.246789	0.560851	0.908151
LNC_003922	XLOC_084557	--	intronic_lncRNA	1.29328	0.405576	0.422597	0.425751
LNC_003923	XLOC_084565	--	intronic_lncRNA	0.87677	0.246384	0.22552	0.242463
LNC_005136	XLOC_117290	--	intronic_lncRNA	0.099379	0.139169	0.504637	0.109177
LNC_003928	XLOC_084637	--	intronic_lncRNA	0	0	0	0.965771
LNC_003929	XLOC_084644	--	intronic_lncRNA	0	1.07157	0.060986	0
LNC_000169	XLOC_002015	--	intronic_lncRNA	1.23973	0.460483	0.666505	0.590311
LNC_000168	XLOC_001990	--	intronic_lncRNA	0.75541	2.39608	1.08592	1.50927
LNC_000165	XLOC_001922	--	intronic_lncRNA	0.969571	0.799856	0.700362	0.627528
LNC_000164	XLOC_001844	--	intronic_lncRNA	0.349687	0.776267	0.9568	0.487698
LNC_005447	XLOC_125558	--	intronic_lncRNA	1.15556	1.00774	1.44277	0
LNC_000166	XLOC_001927	--	intronic_lncRNA	0.306332	0.131382	0.511923	0.67492
LNC_000161	XLOC_001795	--	lincRNA	0.146049	0.589824	0	0
LNC_000160	XLOC_001753	--	intronic_lncRNA	0.421288	0.602411	0.509593	0.368941
LNC_000163	XLOC_001815	--	intronic_lncRNA	0	0	0.620203	0.300169
LNC_000162	XLOC_001796	--	intronic_lncRNA	0.503068	0.837445	0.470131	0.473494
LNC_001388	XLOC_030484	--	intronic_lncRNA	0	0.176472	0	0.536419
LNC_001389	XLOC_030486	--	intronic_lncRNA	0.156684	0.529967	0	0.75909
LNC_001382	XLOC_030376	--	intronic_lncRNA	0.496844	0.6399	0.689086	0.951953
LNC_001383	XLOC_030381	--	intronic_lncRNA	0.269997	0.60865	1.10935	0.864389
LNC_001380	XLOC_030293	--	intronic_lncRNA	0.826346	0.230246	0.244766	0.348463
LNC_001381	XLOC_030347	--	intronic_lncRNA	0.848762	0.549789	0.459794	1.31363
LNC_001386	XLOC_030465	--	intronic_lncRNA	0.936251	0.395949	1.13141	0.97358
LNC_001387	XLOC_030477	--	intronic_lncRNA	0.103133	0.154731	0.532846	0.268271
LNC_001384	XLOC_030446	--	lincRNA	0.129807	0	0.289946	0.434844
LNC_001385	XLOC_030458	--	intronic_lncRNA	1.68118	1.31685	2.18271	1.88118
LNC_004712	XLOC_104899	--	intronic_lncRNA	0.912499	0.687991	1.12548	1.09905
LNC_004713	XLOC_104994	--	intronic_lncRNA	0.598609	0	0.237816	0.16031
LNC_004710	XLOC_104882	--	intronic_lncRNA	0	0	0.429883	0
LNC_004711	XLOC_104896	--	intronic_lncRNA	0.514582	0.440501	0.464179	0.308701
LNC_004716	XLOC_105185	--	intronic_lncRNA	0.202319	0.421543	0.335628	0.540743
LNC_004717	XLOC_105188	--	intronic_lncRNA	0.473341	0.082856	0.414689	0.672021
LNC_004714	XLOC_104995	--	intronic_lncRNA	0.285883	0.41899	1.23203	0.189906
LNC_004715	XLOC_105018	--	intronic_lncRNA	0.477402	0.674048	0.438794	0.735545
LNC_004718	XLOC_105191	--	intronic_lncRNA	0.166279	0.087292	0.497943	0.142075
LNC_004719	XLOC_105211	--	intronic_lncRNA	0.088426	0	0.214116	0.503434
LNC_000833	XLOC_017855	--	lincRNA	0.865757	0.53582	0.340262	0.443811
LNC_000832	XLOC_017848	--	antisense_lncRNA	0	0.091482	0.584795	0
LNC_000831	XLOC_017701	--	intronic_lncRNA	0.511851	0.725839	0.092241	0.117702
LNC_000830	XLOC_017594	--	intronic_lncRNA	0.588815	0.202537	1.14156	0.665657
LNC_000837	XLOC_017959	--	intronic_lncRNA	0.734548	0.611846	1.4163	1.45016
LNC_000836	XLOC_017959	--	intronic_lncRNA	0.211935	0.763979	0.469629	0.294655
LNC_000835	XLOC_017927	--	intronic_lncRNA	0.065081	0.56346	0.045174	0.114644
LNC_000834	XLOC_017871	--	intronic_lncRNA	3.4114	3.12891	1.98316	2.87239
LNC_000839	XLOC_017959	--	intronic_lncRNA	3.8357	6.29074	5.22466	4.28897
LNC_000838	XLOC_017959	--	intronic_lncRNA	0.961109	1.41968	0.713526	2.34842
LNC_006408	XLOC_153684	--	intronic_lncRNA	0.212152	0.423353	0.171428	0.528364
LNC_006409	XLOC_153752	--	intronic_lncRNA	0.319014	1.43273	0	0.699986
LNC_002093	XLOC_047600	--	intronic_lncRNA	0.457203	0.474075	0.391427	0.4718
LNC_002092	XLOC_047590	--	intronic_lncRNA	0.882022	1.03289	0.543764	0.384303
LNC_002091	XLOC_047543	--	intronic_lncRNA	0.288181	1.28455	0.174381	0.324782
LNC_002090	XLOC_047523	--	intronic_lncRNA	0	0	0	0.450689
LNC_002097	XLOC_047617	--	intronic_lncRNA	0.629631	0.469902	0.444162	0.800696
LNC_002096	XLOC_047613	--	intronic_lncRNA	0.66387	0.060416	0.509834	0.114799
LNC_002095	XLOC_047612	--	intronic_lncRNA	0.460535	0.620867	0.037307	0.223703
LNC_002094	XLOC_047603	--	intronic_lncRNA	0.90791	0.496124	0.284081	0.522902
LNC_002099	XLOC_047685	--	antisense_lncRNA	0.874281	0.413544	0.51486	0.313248
LNC_002098	XLOC_047674	--	intronic_lncRNA	27.6186	14.7334	27.948	23.4006
LNC_001430	XLOC_031220	--	intronic_lncRNA	0	0	0.631575	0.545829
LNC_000769	XLOC_016113	--	intronic_lncRNA	0.52733	0.193796	0.334199	0.57339
LNC_000768	XLOC_016030	--	intronic_lncRNA	0.842108	0.658958	1.02907	0.805243
LNC_001431	XLOC_031220	--	intronic_lncRNA	0.995115	0.117751	0.304593	0
LNC_000763	XLOC_015838	--	intronic_lncRNA	0.535574	0.645674	0.663472	0.358583
LNC_000762	XLOC_015834	--	intronic_lncRNA	0.663103	0.407156	0.40755	0.6755
LNC_000761	XLOC_015802	--	lincRNA	0	0	0.481673	0.532863
LNC_000760	XLOC_015792	--	lincRNA	0.531673	0	0	0
LNC_000767	XLOC_016029	--	intronic_lncRNA	0.573667	0.096445	0.217092	0.526426
LNC_000766	XLOC_016006	--	intronic_lncRNA	0.02049	0	0.650276	0.801128
LNC_000765	XLOC_015999	--	intronic_lncRNA	0.580587	0	0.398683	0.458177
LNC_000764	XLOC_015933	--	intronic_lncRNA	0.455758	1.00007	0.425615	0.475344
LNC_006353	XLOC_152277	--	intronic_lncRNA	0.102469	1.07676	0.877588	0.970704
LNC_006354	XLOC_152278	--	intronic_lncRNA	0.251714	0.849317	0.33314	0.462502
LNC_006355	XLOC_152310	--	intronic_lncRNA	1.45614	0.991145	0.937831	1.07269
LNC_002545	XLOC_058889	--	intronic_lncRNA	0.89028	0.440415	0.425814	0.51974
LNC_002544	XLOC_058879	--	intronic_lncRNA	0.335131	0.717441	0.999162	1.10232
LNC_002547	XLOC_058935	--	intronic_lncRNA	1.04898	1.21448	0.957534	0.555703
LNC_002546	XLOC_058922	--	lincRNA	0.363566	2.23475	0	0.049644
LNC_002541	XLOC_058876	--	intronic_lncRNA	0.569021	0.044766	0.265497	0.18594
LNC_002540	XLOC_058875	--	intronic_lncRNA	0.241512	0.500922	0.60664	0.461211
LNC_002543	XLOC_058879	--	intronic_lncRNA	0.578025	0.301714	0.069108	0.347407
LNC_002542	XLOC_058876	--	intronic_lncRNA	0	0.305208	0.891741	0.785347
LNC_006357	XLOC_152358	--	intronic_lncRNA	5.76754	3.03611	1.22422	1.43424
LNC_002549	XLOC_058999	--	intronic_lncRNA	0.344337	0.052272	0.176119	0.895894
LNC_002548	XLOC_058999	--	intronic_lncRNA	0.644712	0.130043	0.430043	1.12712
LNC_003155	XLOC_072771	--	intronic_lncRNA	0.628123	0.724992	0.512117	0.421364
LNC_001438	XLOC_031254	--	intronic_lncRNA	1.29755	0.638296	0.861177	0.752146
LNC_003157	XLOC_072930	--	lincRNA	0.430259	0.735078	0.493147	0.174835
LNC_003156	XLOC_072790	--	lincRNA	0	0	0.536046	0.089624
LNC_003151	XLOC_072744	--	intronic_lncRNA	4.62057	2.44014	3.46189	3.76392
LNC_003150	XLOC_072744	--	intronic_lncRNA	0.760087	0.91707	0.216076	0.184507
LNC_003153	XLOC_072746	--	intronic_lncRNA	0.458783	0.840325	0.117413	0.99393
LNC_003152	XLOC_072744	--	intronic_lncRNA	0.598332	0.303925	1.16339	0.794433
LNC_003159	XLOC_072979	--	intronic_lncRNA	0.551064	0.441207	0.69033	0.432046
LNC_003158	XLOC_072930	--	lincRNA	0.076975	0.489111	0.215107	0.499416
LNC_006429	XLOC_154049	--	intronic_lncRNA	0.500796	0.292251	0.723056	0.241205
LNC_000499	XLOC_008785	--	intronic_lncRNA	1.97804	1.56146	2.26959	1.36167
LNC_000498	XLOC_008784	--	intronic_lncRNA	0.714655	0.323609	0.277848	0.207005
LNC_000495	XLOC_008755	--	intronic_lncRNA	0.630075	1.72887	1.28996	0.9184
LNC_000494	XLOC_008745	--	intronic_lncRNA	0.790556	0.432526	0.660198	0.407867
LNC_000497	XLOC_008771	--	intronic_lncRNA	0.520525	0.231688	0.76357	1.06287
LNC_000496	XLOC_008755	--	intronic_lncRNA	1.8916	1.46373	1.48329	0.83808
LNC_000491	XLOC_008727	--	intronic_lncRNA	0.88324	0.237084	0.133913	0.092215
LNC_000490	XLOC_008722	--	intronic_lncRNA	1.13037	0.372651	0.787537	0
LNC_000493	XLOC_008733	--	intronic_lncRNA	0.226664	0.457318	0.472867	0.168707
LNC_000492	XLOC_008732	--	intronic_lncRNA	0	0.49152	0.161374	0.705774
LNC_002400	XLOC_055424	--	intronic_lncRNA	0.257088	0.824313	0.344456	0
LNC_002401	XLOC_055425	--	intronic_lncRNA	0.180682	0	0.182854	0.766612
LNC_002402	XLOC_055528	--	intronic_lncRNA	0.27909	0.940115	1.42353	1.24565
LNC_002403	XLOC_055528	--	intronic_lncRNA	0.720695	0	0	0
LNC_002404	XLOC_055565	--	intronic_lncRNA	0	0.722148	0	0
LNC_002405	XLOC_055623	--	intronic_lncRNA	0.264273	0.339068	0.201305	0.583137
LNC_002406	XLOC_055673	--	intronic_lncRNA	1.49947	0.33405	0.789798	0.657294
LNC_002407	XLOC_055749	--	lincRNA	1.41168	0.767015	2.21441	1.8421
LNC_002408	XLOC_055749	--	lincRNA	0	0.274878	1.28472	0.697722
LNC_002409	XLOC_055763	--	intronic_lncRNA	0.67304	0.591998	0.516299	0.315113
LNC_001018	XLOC_022110	--	intronic_lncRNA	0.50379	0.365854	0.918114	0.78272
LNC_001019	XLOC_022119	--	intronic_lncRNA	0.404338	0.775059	0.257569	0.340713
LNC_001012	XLOC_021939	--	intronic_lncRNA	0.177666	0.515741	0.03531	0.387876
LNC_001013	XLOC_021953	--	intronic_lncRNA	0.24914	0.339007	0	0.506043
LNC_001010	XLOC_021713	--	antisense_lncRNA	0.975039	0	0.095775	0.212233
LNC_001011	XLOC_021921	--	intronic_lncRNA	0	0.51555	0	0
LNC_001016	XLOC_022108	--	intronic_lncRNA	0.484616	0	0.289117	0.26521
LNC_001017	XLOC_022109	--	intronic_lncRNA	0.19775	0.231595	0.405562	0.220644
LNC_001014	XLOC_021953	--	intronic_lncRNA	1.38633	0.339904	0.777514	0.211261
LNC_001015	XLOC_021959	--	intronic_lncRNA	0.759136	0.595883	0.102186	0
LNC_001171	XLOC_025495	--	intronic_lncRNA	0.279948	0.308176	0.282295	0.420566
LNC_001170	XLOC_025488	--	intronic_lncRNA	0.685113	0.305332	0.914895	0.531704
LNC_001173	XLOC_025518	--	intronic_lncRNA	0	0	0.112286	0.550888
LNC_001172	XLOC_025510	--	intronic_lncRNA	0.407168	0.347916	0.473774	0.289616
LNC_001175	XLOC_025543	--	intronic_lncRNA	0.500561	0.235787	0.214556	0.427122
LNC_001174	XLOC_025531	--	intronic_lncRNA	0	0.418569	0	0
LNC_001177	XLOC_025645	--	intronic_lncRNA	0.433469	0.568503	0.257715	0.742977
LNC_001176	XLOC_025643	--	intronic_lncRNA	0.274613	0.142855	0.220476	0.694037
LNC_001179	XLOC_025651	--	intronic_lncRNA	0.742692	0.531824	0.947689	0.912061
LNC_001178	XLOC_025646	--	intronic_lncRNA	0.484571	0.639554	0.559393	0.722237
LNC_004279	XLOC_092959	--	lincRNA	0.645029	0.341425	0.131359	0.200511
LNC_004278	XLOC_092939	--	intronic_lncRNA	0.871054	0.544943	0.611867	0.486232
LNC_003713	XLOC_079543	--	intronic_lncRNA	0.519932	0.135724	0.73156	0.08336
LNC_003712	XLOC_079525	--	intronic_lncRNA	0.729101	0.165914	0.819992	0.664664
LNC_003711	XLOC_079449	--	intronic_lncRNA	0.645745	0.545305	0.886334	0.983208
LNC_003710	XLOC_079390	--	intronic_lncRNA	0.953398	0.915816	0.077269	0.688503
LNC_003717	XLOC_079729	--	intronic_lncRNA	0	0	0.679689	0.528044
LNC_003716	XLOC_079701	--	intronic_lncRNA	1.80275	0.289492	1.17014	0.927202
LNC_003715	XLOC_079697	--	intronic_lncRNA	0.827887	0.30607	0.577867	0.45714
LNC_003714	XLOC_079548	--	intronic_lncRNA	0.530193	0	0	0
LNC_003719	XLOC_079737	--	intronic_lncRNA	0	0	0	0.615973
LNC_003718	XLOC_079737	--	intronic_lncRNA	0.396081	0.426378	0.375695	0.518392
LNC_005386	XLOC_124077	--	intronic_lncRNA	0	0	0.54777	0.198076
LNC_005387	XLOC_124078	--	intronic_lncRNA	0.510135	0	0.195367	0.116369
LNC_005384	XLOC_124075	--	intronic_lncRNA	0	0	0.456032	0
LNC_005385	XLOC_124076	--	intronic_lncRNA	0	0	0.406678	0.05828
LNC_005382	XLOC_123915	--	lincRNA	0	0	0	0.419314
LNC_005383	XLOC_124074	--	intronic_lncRNA	0.551197	0	0.183173	0
LNC_005380	XLOC_123777	--	intronic_lncRNA	0.243493	0	0	0.623405
LNC_005381	XLOC_123892	--	lincRNA	0	0.254585	0.455761	0
LNC_005388	XLOC_124088	--	intronic_lncRNA	0	0.211263	0.105474	0.500507
LNC_005389	XLOC_124307	--	lincRNA	0.433961	0.781371	0.595936	0.522985
LNC_003438	XLOC_075218	--	lincRNA	1.61005	0.285554	0.244804	0.216218
LNC_003439	XLOC_075219	--	lincRNA	2.75062	0.560516	0.192292	1.02189
LNC_003436	XLOC_075216	--	lincRNA	1.71112	0.597287	0.272205	0.215473
LNC_003437	XLOC_075217	--	lincRNA	2.37776	1.20716	0.238478	0.354885
LNC_003434	XLOC_075214	--	lincRNA	5.76329	1.83449	1.97032	1.63039
LNC_003435	XLOC_075215	--	lincRNA	4.19082	1.55976	0.598119	0.948767
LNC_003432	XLOC_075212	--	lincRNA	1.64953	1.06412	0.96531	0.233515
LNC_003433	XLOC_075213	--	lincRNA	0.319634	0.854748	0.196107	0.492636
LNC_003430	XLOC_075210	--	lincRNA	1.42221	0.813074	0.647355	0.459185
LNC_003431	XLOC_075211	--	lincRNA	3.63393	2.13636	1.22564	1.02869
LNC_005658	XLOC_132076	--	intronic_lncRNA	1.02458	0.24667	0.222096	0.689274
LNC_005659	XLOC_132204	--	intronic_lncRNA	0.929219	0.620824	0.82628	0.951612
LNC_005650	XLOC_131609	--	intronic_lncRNA	1.91142	0.548597	1.52962	0.880391
LNC_005651	XLOC_131631	--	intronic_lncRNA	0	0	0	0.396314
LNC_005652	XLOC_131727	--	intronic_lncRNA	0	0	0.299929	0.806886
LNC_005653	XLOC_131729	--	intronic_lncRNA	0	0	0	0.538314
LNC_005654	XLOC_131729	--	intronic_lncRNA	0.395854	0.074593	0.647805	0
LNC_005655	XLOC_131810	--	lincRNA	0.134315	0.483328	0	0
LNC_005656	XLOC_132076	--	intronic_lncRNA	0.405973	0.702753	0.347354	0.804154
LNC_005657	XLOC_132076	--	intronic_lncRNA	0.626079	0.734015	1.28703	0.697587
LNC_002390	XLOC_055262	--	intronic_lncRNA	0.593707	0.461537	0.500421	0.494233
LNC_002391	XLOC_055263	--	intronic_lncRNA	0.1349	0.360285	0.605927	0.576423
LNC_002392	XLOC_055285	--	intronic_lncRNA	0	0	0.424439	0.140041
LNC_002393	XLOC_055286	--	intronic_lncRNA	0	0.473952	0.785473	0
LNC_002394	XLOC_055287	--	intronic_lncRNA	0	0	0.402611	0.06709
LNC_002395	XLOC_055290	--	intronic_lncRNA	0.532042	0.759002	0.593802	0.695804
LNC_002396	XLOC_055311	--	intronic_lncRNA	0.393217	1.01641	0.43543	0.526525
LNC_002397	XLOC_055349	--	intronic_lncRNA	0.220851	0.356371	0.670297	0.238264
LNC_002398	XLOC_055400	--	intronic_lncRNA	2.30126	0.898081	1.32539	1.07789
LNC_002399	XLOC_055423	--	intronic_lncRNA	0.708164	0.754253	0.671073	0.52503
LNC_003380	XLOC_075175	--	lincRNA	0.875332	1.32799	0.407737	0.367657
LNC_003381	XLOC_075175	--	lincRNA	2.12644	1.14844	0	0.836031
LNC_003382	XLOC_075175	--	lincRNA	0.602659	0.718248	0.713609	0
LNC_003383	XLOC_075176	--	lincRNA	1.4513	0.093213	0.134204	0.898115
LNC_003384	XLOC_075177	--	lincRNA	2.21552	0	0	0
LNC_003385	XLOC_075177	--	lincRNA	12.8353	8.39862	3.95804	5.49651
LNC_003386	XLOC_075180	--	lincRNA	4.68453	2.11358	1.20328	1.66773
LNC_003387	XLOC_075181	--	lincRNA	3.61996	2.728	0.532044	1.17893
LNC_003388	XLOC_075182	--	lincRNA	1.32987	1.69736	0.397417	0.115348
LNC_003389	XLOC_075183	--	lincRNA	2.5453	1.17877	0.517611	0.387657
LNC_006099	XLOC_145929	--	intronic_lncRNA	1.05164	0.611112	1.64025	1.74077
LNC_006098	XLOC_145929	--	intronic_lncRNA	0.986149	0.505539	0.321079	0.454144
LNC_006097	XLOC_145837	--	intronic_lncRNA	0.11138	0.224248	0.470678	0.438555
LNC_006096	XLOC_145835	--	antisense_lncRNA	0	0	0.36241	0
LNC_006095	XLOC_145835	--	intronic_lncRNA	0	0.489301	0	0
LNC_006094	XLOC_145835	--	intronic_lncRNA	0.234173	0.165357	0.501476	0.151145
LNC_006093	XLOC_145811	--	intronic_lncRNA	0.190911	0	0.411467	0.171218
LNC_006092	XLOC_145810	--	intronic_lncRNA	0.3489	0.928111	0.774431	0.7203
LNC_006091	XLOC_145806	--	intronic_lncRNA	0	0.38064	0.398838	0.4816
LNC_006090	XLOC_145741	--	intronic_lncRNA	0.68623	0.834447	0.468986	0.567744
LNC_004529	XLOC_099327	--	intronic_lncRNA	1.51143	1.2246	1.13337	0.91157
LNC_004528	XLOC_099323	--	intronic_lncRNA	0	0	0.521903	0
LNC_004521	XLOC_099023	--	intronic_lncRNA	0.339384	0	0.420077	0.461238
LNC_004520	XLOC_099019	--	intronic_lncRNA	0.201516	0.193331	0.62524	0.179504
LNC_004523	XLOC_099064	--	intronic_lncRNA	0.357102	0.17824	0.611849	0.462585
LNC_004522	XLOC_099023	--	intronic_lncRNA	0.487091	0.09135	0.508853	0.057525
LNC_004525	XLOC_099136	--	intronic_lncRNA	0.308104	0.257775	0.198347	0.846183
LNC_004524	XLOC_099122	--	intronic_lncRNA	0.313563	0.359959	1.23413	0.905018
LNC_004527	XLOC_099263	--	intronic_lncRNA	0.582025	0.829385	0.478427	0.638403
LNC_004526	XLOC_099137	--	intronic_lncRNA	0.078404	0.338637	0.086519	0.485866
LNC_005016	XLOC_114561	--	intronic_lncRNA	0.587807	0.25365	0.075154	0.540264
LNC_000537	XLOC_009994	--	intronic_lncRNA	0.68538	0.944497	0.778477	0
LNC_000534	XLOC_009956	--	lincRNA	0	0	0	0.529094
LNC_000535	XLOC_009963	--	intronic_lncRNA	0.568903	0.638499	0.386609	0.686555
LNC_000532	XLOC_009902	--	intronic_lncRNA	2.58642	1.47977	0.955044	0.46941
LNC_000533	XLOC_009917	--	intronic_lncRNA	0.520617	0.736764	0.914704	0.682061
LNC_000530	XLOC_009901	--	intronic_lncRNA	0.991852	0.29787	0.671588	0.997001
LNC_000531	XLOC_009902	--	intronic_lncRNA	1.10907	0.359662	0.165978	0.078081
LNC_000538	XLOC_009994	--	intronic_lncRNA	0	0	0.173155	0.849471
LNC_000539	XLOC_009994	--	intronic_lncRNA	0.373232	0.303053	0.70901	0.42666
LNC_003948	XLOC_084972	--	intronic_lncRNA	0.007213	0.705669	0.007999	0.542373
LNC_003949	XLOC_084972	--	intronic_lncRNA	0.315522	0.534984	0.415205	0.073723
LNC_003946	XLOC_084971	--	intronic_lncRNA	0.069682	0.449877	0.294528	0.287011
LNC_003947	XLOC_084971	--	intronic_lncRNA	0.219385	0	0.081548	0.157042
LNC_003944	XLOC_084969	--	intronic_lncRNA	0.52161	0.889587	0	0.388831
LNC_003945	XLOC_084970	--	intronic_lncRNA	0.191934	0.481108	0.196122	0.204426
LNC_003942	XLOC_084915	--	antisense_lncRNA	0.507033	0.488154	0.443512	0.662512
LNC_003943	XLOC_084956	--	lincRNA	0.258894	0.568673	1.4957	0.741649
LNC_003940	XLOC_084863	--	intronic_lncRNA	0.185117	0	0.36036	0.461551
LNC_003941	XLOC_084863	--	intronic_lncRNA	0	0.631492	0.036237	0.035547
LNC_000147	XLOC_001496	--	intronic_lncRNA	0.626437	0.433402	0.082471	0
LNC_000146	XLOC_001490	--	intronic_lncRNA	0	0.196181	0.425079	0
LNC_000145	XLOC_001474	--	antisense_lncRNA	0	0	0.487438	0.57552
LNC_000144	XLOC_001442	--	intronic_lncRNA	0.61133	0.332253	0.25946	0.401647
LNC_000143	XLOC_001423	--	intronic_lncRNA	0.199114	0.028783	0.919624	0.359901
LNC_000142	XLOC_001423	--	intronic_lncRNA	0.619175	0.473539	1.52752	0.381814
LNC_000141	XLOC_001423	--	antisense_lncRNA	0.387059	0.281348	0.532894	0.457936
LNC_000140	XLOC_001418	--	intronic_lncRNA	0.220712	0.346789	0.145678	0.992763
LNC_000149	XLOC_001520	--	intronic_lncRNA	1.05322	0.226628	0.728112	0.952559
LNC_000148	XLOC_001498	--	intronic_lncRNA	0.192482	0.220936	0.770757	1.21175
LNC_005993	XLOC_142527	--	intronic_lncRNA	0.214507	0.642372	0.348409	0.429869
LNC_005992	XLOC_142523	--	intronic_lncRNA	0.044182	0.098696	5.23332	0.026816
LNC_005991	XLOC_142523	--	intronic_lncRNA	3.1353	0.00419	2.73051	5.4501
LNC_005990	XLOC_142512	--	intronic_lncRNA	0	0.499994	0	0
LNC_005997	XLOC_142632	--	intronic_lncRNA	0.501896	0.253964	0.686702	0.465547
LNC_005996	XLOC_142545	--	intronic_lncRNA	0.242376	0	0.469713	0.483268
LNC_005995	XLOC_142529	--	intronic_lncRNA	0.222126	0.542237	0.423793	0.626689
LNC_005994	XLOC_142528	--	intronic_lncRNA	0.20718	0.277356	0.22799	0.677353
LNC_001812	XLOC_040713	--	intronic_lncRNA	0.239048	0.063043	0.696741	0.537014
LNC_001813	XLOC_040802	--	intronic_lncRNA	1.18244	0.391244	0.704452	0.646861
LNC_001810	XLOC_040705	--	intronic_lncRNA	0.258674	0	0.38895	0
LNC_001811	XLOC_040713	--	intronic_lncRNA	0.250188	0.268501	0.333627	0.437739
LNC_001816	XLOC_040815	--	intronic_lncRNA	0.991142	0.507467	0.742685	0.470167
LNC_001817	XLOC_040846	--	intronic_lncRNA	0.486101	1.01004	0.355803	0.653775
LNC_001814	XLOC_040802	--	intronic_lncRNA	0.437044	0.158175	0.709423	0.501176
LNC_001815	XLOC_040812	--	antisense_lncRNA	0.87667	0.129112	0	0
LNC_001818	XLOC_040912	--	lincRNA	0.127477	0.254383	0.076569	0.411614
LNC_001819	XLOC_040917	--	intronic_lncRNA	0.375087	0.418588	0.538661	0
LNC_004734	XLOC_105744	--	intronic_lncRNA	0.127421	0.499084	0.516615	0
LNC_004735	XLOC_105745	--	intronic_lncRNA	0	0.10538	0.580192	0.543858
LNC_004736	XLOC_105756	--	intronic_lncRNA	0	0.079683	0	0.42776
LNC_004737	XLOC_105757	--	intronic_lncRNA	0	0	0.592075	0.024994
LNC_004730	XLOC_105519	--	intronic_lncRNA	0.296528	0.306065	0.490369	0.123913
LNC_004731	XLOC_105613	--	lincRNA	0.171014	0.075406	0.430283	0.478435
LNC_004732	XLOC_105661	--	intronic_lncRNA	0.176215	0.058554	0.652115	0.938314
LNC_004733	XLOC_105691	--	intronic_lncRNA	0.743725	0.823872	1.08239	0.951412
LNC_004738	XLOC_105777	--	lincRNA	0.669892	0.377846	0.306002	0
LNC_004739	XLOC_105838	--	intronic_lncRNA	0	0.356136	0.801275	0
LNC_000855	XLOC_018341	--	intronic_lncRNA	0	0.349757	0.50945	0.40681
LNC_000854	XLOC_018323	--	intronic_lncRNA	0.377013	0.793849	0.16086	0.309871
LNC_000857	XLOC_018355	--	intronic_lncRNA	0.761999	0.564787	0.112193	0.212829
LNC_000856	XLOC_018354	--	intronic_lncRNA	0.565115	0.308361	0.38963	0.566696
LNC_000851	XLOC_018306	--	intronic_lncRNA	0.240677	0.203506	0.981452	0.700328
LNC_000850	XLOC_018293	--	intronic_lncRNA	0.920539	0.908107	0.579362	0.567904
LNC_000853	XLOC_018315	--	intronic_lncRNA	0.680874	0.211164	0.272796	0.555696
LNC_000852	XLOC_018313	--	intronic_lncRNA	0.516121	0.134485	0.427012	0.212376
LNC_000859	XLOC_018403	--	intronic_lncRNA	0.003129	0.259561	0.529782	0.7256
LNC_000858	XLOC_018403	--	intronic_lncRNA	0.600269	0	2.34256	1.90961
LNC_000259	XLOC_003721	--	intronic_lncRNA	0.732285	0.169007	0.278716	0.238352
LNC_003787	XLOC_081094	--	lincRNA	0	0	0.603125	0
LNC_006468	XLOC_155648	--	intronic_lncRNA	0.606339	0.261757	0.340207	0.282108
LNC_006469	XLOC_155649	--	intronic_lncRNA	0	0.54205	0.451422	0.228232
LNC_006466	XLOC_155480	--	intronic_lncRNA	1.14594	0.584667	1.21906	0.94479
LNC_006467	XLOC_155647	--	intronic_lncRNA	0.12712	0.245358	0.730747	0.932782
LNC_006464	XLOC_155460	--	lincRNA	0.135147	0.398035	0.579356	0.144209
LNC_006465	XLOC_155472	--	intronic_lncRNA	0.242896	0.154305	0.691543	0.518718
LNC_006462	XLOC_155401	--	intronic_lncRNA	0.074001	0.19492	0.216675	0.450328
LNC_006463	XLOC_155430	--	lincRNA	0.545697	0.33077	0.262176	0.395081
LNC_006460	XLOC_155376	--	intronic_lncRNA	2.93172	2.98309	3.69046	4.7759
LNC_006461	XLOC_155396	--	intronic_lncRNA	1.89807	1.25748	2.33656	2.99832
LNC_000709	XLOC_014079	--	intronic_lncRNA	0.621269	0.372615	0.835976	1.40102
LNC_000708	XLOC_014075	--	lincRNA	0.748233	0.501704	0.17825	0.553666
LNC_000705	XLOC_014029	--	lincRNA	0.488707	0.307523	0.675375	1.8575
LNC_000704	XLOC_014028	--	intronic_lncRNA	0.657066	0.628289	0.36664	0.88524
LNC_000707	XLOC_014034	--	intronic_lncRNA	0.536534	0.183542	0.926048	0.34083
LNC_000706	XLOC_014029	--	lincRNA	0.974055	0.141449	0	0
LNC_000701	XLOC_013941	--	antisense_lncRNA	0.524405	0.188264	0.081125	0
LNC_000700	XLOC_013940	--	intronic_lncRNA	0.488715	0.615144	0	0.595727
LNC_000703	XLOC_014027	--	intronic_lncRNA	0.856416	0.294603	0.227119	0.035829
LNC_000702	XLOC_014027	--	intronic_lncRNA	0.117913	0.495835	0.297308	0.700106
LNC_005373	XLOC_123539	--	intronic_lncRNA	1.62278	0.688015	1.14622	0.263604
LNC_002569	XLOC_059686	--	intronic_lncRNA	0.692375	0	0.059015	0.482912
LNC_002568	XLOC_059676	--	intronic_lncRNA	0.275069	0.069314	0.41584	0.176603
LNC_002567	XLOC_059565	--	intronic_lncRNA	2.61279	2.34988	5.06242	5.74673
LNC_002566	XLOC_059478	--	intronic_lncRNA	0.213565	0	0.298182	0.656816
LNC_002565	XLOC_059430	--	lincRNA	0.593964	0.254837	0.201449	0.234024
LNC_002564	XLOC_059425	--	lincRNA	0.60498	0.157148	0.40279	0.324688
LNC_002563	XLOC_059306	--	intronic_lncRNA	1.44924	0.31296	0.603344	0.595891
LNC_002562	XLOC_059268	--	intronic_lncRNA	1.02753	0.8651	0.974557	0.730944
LNC_002561	XLOC_059265	--	intronic_lncRNA	0.159172	0	0.497731	0.181561
LNC_002560	XLOC_059228	--	intronic_lncRNA	0.193117	0.316615	0.340197	0.93141
LNC_005746	XLOC_134772	--	intronic_lncRNA	0.763575	0.414119	0.837935	0.789552
LNC_000250	XLOC_003540	--	intronic_lncRNA	0.56827	0.362127	0.961266	0.767591
LNC_003179	XLOC_073647	--	intronic_lncRNA	0.935264	0.451564	1.12118	0.451966
LNC_003178	XLOC_073647	--	intronic_lncRNA	0.630338	0.476085	0.48283	0.385588
LNC_003177	XLOC_073642	--	intronic_lncRNA	1.20245	0.656458	1.773	2.07872
LNC_005377	XLOC_123545	--	intronic_lncRNA	0.939017	1.60124	0.909544	0.584868
LNC_003175	XLOC_073538	--	intronic_lncRNA	0.260128	0.125792	0.410229	0
LNC_003174	XLOC_073537	--	intronic_lncRNA	0.902393	0.351678	0	0.102899
LNC_003173	XLOC_073500	--	intronic_lncRNA	0.966664	0.302855	1.08963	1.10546
LNC_003172	XLOC_073482	--	antisense_lncRNA	1.04851	0.748535	0.469922	0.135887
LNC_003171	XLOC_073476	--	lincRNA	0.947446	0	0	0.638051
LNC_003170	XLOC_073449	--	intronic_lncRNA	0.076336	1.30692	0.382816	0.352224
LNC_005745	XLOC_134675	--	intronic_lncRNA	1.28846	0.685519	0.441845	0.380258
LNC_000255	XLOC_003570	--	intronic_lncRNA	1.39052	2.07788	1.65707	1.90001
LNC_005742	XLOC_134634	--	intronic_lncRNA	1.02957	0.416359	0.147245	0.22083
LNC_000254	XLOC_003569	--	intronic_lncRNA	0.364279	0	0.149169	0.426938
LNC_005743	XLOC_134658	--	intronic_lncRNA	1.55534	0.80315	0.776043	0.803033
LNC_001302	XLOC_028547	--	intronic_lncRNA	0.461737	0.329276	0.624667	0.855046
LNC_005740	XLOC_134593	--	intronic_lncRNA	0.997066	0	0.436821	0.479583
LNC_001303	XLOC_028552	--	intronic_lncRNA	0.354185	0.445115	1.38496	0.995848
LNC_005741	XLOC_134594	--	intronic_lncRNA	0.412267	0.645808	0.420113	0.515892
LNC_001300	XLOC_028529	--	intronic_lncRNA	1.81441	1.05837	0.971198	1.24839
LNC_001301	XLOC_028536	--	intronic_lncRNA	0.105027	0	0	0.862175
LNC_001306	XLOC_028577	--	intronic_lncRNA	0.230172	0.71012	0.451647	0.091849
LNC_001307	XLOC_028580	--	intronic_lncRNA	0.549343	0.547536	0.85714	1.93528
LNC_006288	XLOC_150773	--	lincRNA	0.441185	1.45455	0.293291	0.47445
LNC_006289	XLOC_150781	--	intronic_lncRNA	0.521945	0.521297	0.08294	0.351025
LNC_001304	XLOC_028557	--	antisense_lncRNA	0.360471	0.682731	0.510324	0.600344
LNC_006282	XLOC_150613	--	intronic_lncRNA	0.97117	0.626535	0.71654	0.674055
LNC_006283	XLOC_150646	--	intronic_lncRNA	0.619595	0	0	0
LNC_006280	XLOC_150585	--	intronic_lncRNA	0	0.01314	0.542984	0.807621
LNC_001305	XLOC_028576	--	intronic_lncRNA	0.239884	0.332248	0.720838	0.52274
LNC_006286	XLOC_150766	--	intronic_lncRNA	0.064273	0.191684	0.083065	0.536089
LNC_006287	XLOC_150771	--	lincRNA	0.354928	0.535095	0.041285	0
LNC_006284	XLOC_150679	--	lincRNA	0.357605	0.348021	0.431154	0.411321
LNC_006285	XLOC_150683	--	lincRNA	0	0.574251	0	0
LNC_006277	XLOC_150540	--	intronic_lncRNA	0.853313	0.839883	0.538995	0.381804
LNC_006276	XLOC_150540	--	intronic_lncRNA	2.41607	0.224896	0.744077	0.437567
LNC_006275	XLOC_150540	--	intronic_lncRNA	0.703798	1.64603	0.444767	0.050413
LNC_006274	XLOC_150540	--	intronic_lncRNA	0.944116	0.419887	1.64851	1.14682
LNC_006273	XLOC_150540	--	intronic_lncRNA	3.36388	2.36159	2.94003	2.03341
LNC_006272	XLOC_150497	--	intronic_lncRNA	0	0.070645	0.651266	0.974729
LNC_001038	XLOC_022484	--	intronic_lncRNA	0.533299	0.380834	0	0
LNC_001039	XLOC_022485	--	intronic_lncRNA	0.512155	0.1269	0	0
LNC_001034	XLOC_022403	--	intronic_lncRNA	0.503737	0.89568	1.15729	1.26317
LNC_001035	XLOC_022410	--	intronic_lncRNA	1.16475	1.07427	1.21667	0.22577
LNC_001036	XLOC_022410	--	intronic_lncRNA	0	0	0	1.35482
LNC_001037	XLOC_022422	--	lincRNA	0.577665	0.327235	2.31	1.70199
LNC_001030	XLOC_022398	--	intronic_lncRNA	0.160058	0.76346	0.193581	0.133794
LNC_001031	XLOC_022399	--	intronic_lncRNA	15.9283	23.3503	21.5009	23.9005
LNC_001032	XLOC_022401	--	intronic_lncRNA	0.749643	0.805338	0.837402	0.203905
LNC_001033	XLOC_022403	--	intronic_lncRNA	0.795439	0.027557	1.4187	0.460385
LNC_004284	XLOC_093338	--	intronic_lncRNA	0.787537	0.411817	0.306841	0.877528
LNC_004285	XLOC_093355	--	intronic_lncRNA	0.329401	0.165712	0.402611	0.201271
LNC_001159	XLOC_025224	--	lincRNA	0.418222	0.545483	0.703417	0.529425
LNC_001158	XLOC_025187	--	lincRNA	1.12245	0.287653	0.134773	0.119366
LNC_004280	XLOC_092993	--	intronic_lncRNA	0.78909	0	0	0.192669
LNC_004281	XLOC_093016	--	intronic_lncRNA	0.173432	0.300294	0.836011	0.222737
LNC_004282	XLOC_093094	--	intronic_lncRNA	0.356829	0.071261	0.353663	0.808627
LNC_004283	XLOC_093262	--	intronic_lncRNA	0.507682	0.367245	0.478601	0.289162
LNC_001153	XLOC_024962	--	intronic_lncRNA	1.68245	0.298471	1.29994	0.888046
LNC_001152	XLOC_024954	--	intronic_lncRNA	0.164673	0.058207	0.478584	0.461649
LNC_001151	XLOC_024953	--	intronic_lncRNA	0.553819	0.281445	0.574221	0.114824
LNC_001150	XLOC_024933	--	intronic_lncRNA	0.402962	0.295683	0.552403	0.588494
LNC_004288	XLOC_093368	--	intronic_lncRNA	1.03685	0.123844	0.162182	0.05782
LNC_004289	XLOC_093368	--	intronic_lncRNA	0.628714	0.095045	0.040514	0.026308
LNC_001155	XLOC_024968	--	intronic_lncRNA	0	0	0.474103	0.491441
LNC_001154	XLOC_024962	--	intronic_lncRNA	1.58483	1.20528	1.25899	1.58414
LNC_003883	XLOC_083406	--	intronic_lncRNA	0.227053	0.364924	0.530862	0.199351
LNC_003882	XLOC_083405	--	intronic_lncRNA	1.69087	0.343297	1.12982	0.50268
LNC_003881	XLOC_083401	--	intronic_lncRNA	0	0.224804	0.546178	0.273042
LNC_003880	XLOC_083400	--	intronic_lncRNA	0	0	0	0.404855
LNC_003887	XLOC_083452	--	intronic_lncRNA	0.368725	1.22518	1.18466	0.159358
LNC_003886	XLOC_083450	--	intronic_lncRNA	1.03636	1.14318	1.43047	1.36519
LNC_003885	XLOC_083446	--	intronic_lncRNA	0.243943	0.226173	0.149043	0.451569
LNC_003884	XLOC_083444	--	antisense_lncRNA	0.598989	0	0.213637	0.069165
LNC_003889	XLOC_083628	--	intronic_lncRNA	0	0.656712	0.200311	0.214192
LNC_003888	XLOC_083546	--	intronic_lncRNA	0.522867	0.070506	0.06053	0.121039
LNC_000288	XLOC_004229	--	intronic_lncRNA	0.598759	1.29784	0.535079	1.02102
LNC_003774	XLOC_080684	--	intronic_lncRNA	0.858602	0.340044	0	0
LNC_003777	XLOC_080806	--	intronic_lncRNA	0	0	1.10817	0
LNC_003776	XLOC_080744	--	intronic_lncRNA	0.818296	0.746742	0.507718	0.437439
LNC_003771	XLOC_080661	--	intronic_lncRNA	0.678932	0	0	0.992372
LNC_003770	XLOC_080661	--	intronic_lncRNA	0.869466	0.228568	0.56422	0.626713
LNC_003773	XLOC_080675	--	intronic_lncRNA	0	0.000733	0.454121	0.04274
LNC_003772	XLOC_080671	--	intronic_lncRNA	0.600513	1.03855	0.278852	0.840938
LNC_000280	XLOC_004027	--	lincRNA	1.22106	2.80407	0.427426	0.99757
LNC_000281	XLOC_004072	--	antisense_lncRNA	0.48894	0.089272	0.46399	0.936822
LNC_000282	XLOC_004090	--	intronic_lncRNA	0.858173	0.735237	0.324074	0.555126
LNC_000283	XLOC_004113	--	lincRNA	0	0	0.391427	0
LNC_003779	XLOC_080808	--	intronic_lncRNA	0.295316	0.579312	0.337796	0.455651
LNC_003778	XLOC_080808	--	intronic_lncRNA	0.839854	0.804733	0.740872	0.880374
LNC_000286	XLOC_004155	--	antisense_lncRNA	0.867861	0	0	0
LNC_000287	XLOC_004201	--	lincRNA	0.888658	1.56832	1.51496	1.79744
LNC_002828	XLOC_065419	--	lincRNA	0.297157	0.664761	0.253926	0.206718
LNC_002829	XLOC_065419	--	lincRNA	0.503976	0	0	0
LNC_002822	XLOC_065386	--	lincRNA	0.057369	0.037381	0	0.83364
LNC_002823	XLOC_065387	--	lincRNA	2.55478	2.08747	0.496822	0.898698
LNC_002820	XLOC_065382	--	lincRNA	1.29284	0.340327	0.331483	0.402277
LNC_002821	XLOC_065386	--	lincRNA	1.3309	0.22226	0	0
LNC_002826	XLOC_065395	--	lincRNA	3.34564	3.31986	0.23367	1.36583
LNC_002827	XLOC_065408	--	lincRNA	0.788284	0.023986	0	0.545767
LNC_002824	XLOC_065391	--	lincRNA	0.961688	0.381389	0.070505	1.0683
LNC_002825	XLOC_065391	--	lincRNA	0.90499	0.152242	0.354012	0.668117
LNC_003410	XLOC_075199	--	lincRNA	1.46917	0.049337	0	0
LNC_003411	XLOC_075199	--	lincRNA	1.5366	0.386219	0.186277	0.370524
LNC_003412	XLOC_075200	--	lincRNA	8.88396	5.8103	2.85672	3.02734
LNC_003413	XLOC_075201	--	lincRNA	2.78903	1.56431	0.55495	1.31279
LNC_003414	XLOC_075202	--	lincRNA	1.9912	0.682284	0.735187	0.364597
LNC_003415	XLOC_075203	--	lincRNA	3.06777	1.07997	0.479769	0.340505
LNC_003416	XLOC_075206	--	lincRNA	0	1.66621	0	0
LNC_003417	XLOC_075206	--	lincRNA	3.6878	2.34761	1.13343	0.457452
LNC_003418	XLOC_075206	--	lincRNA	1.2407	0	0	0
LNC_003419	XLOC_075206	--	lincRNA	2.55146	0.506958	0.633969	0.418337
LNC_006071	XLOC_145122	--	lincRNA	0.186458	0.174571	0.653335	0.594484
LNC_006070	XLOC_145089	--	intronic_lncRNA	0.854505	0.729361	0.794796	0.775589
LNC_006073	XLOC_145188	--	antisense_lncRNA	2.08585	0.067145	0.312737	0.501307
LNC_006072	XLOC_145156	--	lincRNA	0.612344	0.488608	0.134904	0.322893
LNC_006075	XLOC_145266	--	intronic_lncRNA	0	0	0.167795	0.462899
LNC_006074	XLOC_145203	--	intronic_lncRNA	0.669031	0.603636	0.217285	0.214945
LNC_006077	XLOC_145269	--	intronic_lncRNA	0.994054	3.21792	1.66516	2.39651
LNC_006076	XLOC_145267	--	intronic_lncRNA	0	0	0.284244	0.243934
LNC_006079	XLOC_145305	--	lincRNA	0.422974	0.343785	0.974478	0.679547
LNC_006078	XLOC_145301	--	intronic_lncRNA	0	0.487062	0.100797	0
LNC_004503	XLOC_098756	--	intronic_lncRNA	1.36929	1.24189	1.749	1.67358
LNC_004502	XLOC_098750	--	intronic_lncRNA	0.104175	0	0.462978	0
LNC_004501	XLOC_098699	--	intronic_lncRNA	2.29793	0.96949	0.139887	0.217636
LNC_004500	XLOC_098699	--	intronic_lncRNA	11.0055	4.82723	1.36624	1.97569
LNC_004507	XLOC_098802	--	intronic_lncRNA	0.347764	0.108141	0.281639	0.694526
LNC_004506	XLOC_098777	--	intronic_lncRNA	0.269785	0	0.435766	0.777871
LNC_004505	XLOC_098774	--	intronic_lncRNA	0.560649	0.510354	0.731633	1.03561
LNC_004504	XLOC_098772	--	intronic_lncRNA	0.508422	0	0.684712	0.677292
LNC_004509	XLOC_098881	--	intronic_lncRNA	0	0	0	0.500768
LNC_004508	XLOC_098830	--	intronic_lncRNA	0.246193	0.127846	0.336525	0.361903
LNC_005049	XLOC_115258	--	lincRNA	0.554127	0.067793	0	0
LNC_005048	XLOC_115257	--	lincRNA	0.609751	0	0	0
LNC_005041	XLOC_115099	--	intronic_lncRNA	0.585741	0.376907	0	0
LNC_005040	XLOC_115091	--	intronic_lncRNA	0	0.154665	0.626284	0.124818
LNC_005043	XLOC_115100	--	intronic_lncRNA	0	0.108988	0	0.740837
LNC_005042	XLOC_115100	--	intronic_lncRNA	0.534637	0.237299	0.13484	0.033624
LNC_005045	XLOC_115110	--	lincRNA	0	0.487389	0	0
LNC_005044	XLOC_115103	--	intronic_lncRNA	19.6195	41.6437	29.4844	23.0645
LNC_005047	XLOC_115197	--	intronic_lncRNA	0.104637	0.262598	0.399755	0.696787
LNC_005046	XLOC_115192	--	intronic_lncRNA	0.927911	1.19216	1.78927	1.66119
LNC_000518	XLOC_009176	--	intronic_lncRNA	0.179412	0.064444	0.721483	0.441125
LNC_000519	XLOC_009195	--	intronic_lncRNA	0	0	0.651539	0.012991
LNC_000510	XLOC_009026	--	intronic_lncRNA	0.111749	0.666317	0.42227	0.717471
LNC_000511	XLOC_009026	--	intronic_lncRNA	2.26571	1.95238	1.47078	1.38798
LNC_005032	XLOC_114844	--	intronic_lncRNA	0.544757	0.494522	0.583099	0.162638
LNC_005033	XLOC_114844	--	intronic_lncRNA	0	0	0.013478	0.502292
LNC_005034	XLOC_114846	--	intronic_lncRNA	0.161688	0.570368	0.099793	0.26359
LNC_000515	XLOC_009042	--	intronic_lncRNA	4.03328	5.871	1.74027	2.05735
LNC_005036	XLOC_114956	--	intronic_lncRNA	2.03612	1.06488	3.15928	2.77829
LNC_000517	XLOC_009112	--	intronic_lncRNA	0.542744	0.836678	0.962491	0.671298
LNC_003960	XLOC_085212	--	intronic_lncRNA	0.274111	0.195974	0.80505	0.387999
LNC_003961	XLOC_085306	--	intronic_lncRNA	0.733528	0.499395	0.806888	0.72542
LNC_003962	XLOC_085348	--	lincRNA	0.153824	0	0	0.603909
LNC_003963	XLOC_085357	--	lincRNA	0.15093	0.240263	0.435797	0.349321
LNC_003964	XLOC_085436	--	intronic_lncRNA	0.391445	0	0.079076	0.395313
LNC_003965	XLOC_085571	--	intronic_lncRNA	0.42746	0.292878	0.792504	0.461311
LNC_003966	XLOC_085572	--	intronic_lncRNA	0.711965	0.110135	1.37123	0.896663
LNC_003967	XLOC_085573	--	intronic_lncRNA	0	0.107009	0.179112	0.753787
LNC_003968	XLOC_085573	--	intronic_lncRNA	0	0.506303	0	0
LNC_003969	XLOC_085615	--	intronic_lncRNA	0	0.31075	0.653691	0
LNC_002611	XLOC_060327	--	intronic_lncRNA	0.52572	0	0.234856	0.701009
LNC_002610	XLOC_060272	--	intronic_lncRNA	0.912218	0.023138	0.823029	1.82301
LNC_002613	XLOC_060341	--	intronic_lncRNA	0	0	0	0.666484
LNC_002612	XLOC_060341	--	intronic_lncRNA	2.28851	0.944342	4.36613	2.74641
LNC_002615	XLOC_060369	--	intronic_lncRNA	0.005947	0.148336	0.022664	0.500759
LNC_002614	XLOC_060368	--	intronic_lncRNA	0.619895	0	0.51213	1.12263
LNC_002617	XLOC_060461	--	intronic_lncRNA	0	0	0.398062	0.086559
LNC_002616	XLOC_060369	--	intronic_lncRNA	0.238129	0	0.39496	0.400782
LNC_002619	XLOC_060518	--	intronic_lncRNA	0.254718	0.108399	0.067601	0.361744
LNC_002618	XLOC_060518	--	intronic_lncRNA	0.647151	0.38811	0.447455	0.386112
LNC_004349	XLOC_094664	--	intronic_lncRNA	0.143677	0	0.508091	0.23159
LNC_004348	XLOC_094651	--	intronic_lncRNA	0.653958	0	0.493438	0.135659
LNC_004341	XLOC_094396	--	intronic_lncRNA	0.13176	0	0	1.09641
LNC_004340	XLOC_094357	--	lincRNA	0.893075	0.047577	0	0
LNC_004343	XLOC_094466	--	intronic_lncRNA	0.421577	0.315531	0.5672	0.746537
LNC_004342	XLOC_094465	--	intronic_lncRNA	0	0.133746	0.520746	0.971891
LNC_004345	XLOC_094495	--	intronic_lncRNA	0.172654	0.555484	0.379913	0.561105
LNC_004344	XLOC_094471	--	intronic_lncRNA	1.54002	0.875077	0.997649	1.07642
LNC_004347	XLOC_094510	--	intronic_lncRNA	0.538268	0.196861	1.20294	1.01658
LNC_004346	XLOC_094497	--	intronic_lncRNA	2.00179	0.434791	0.310846	0.292566
LNC_001834	XLOC_041168	--	intronic_lncRNA	0	0.088145	0	0.711347
LNC_001835	XLOC_041176	--	intronic_lncRNA	0.234079	0.622812	0.567438	0.378227
LNC_001836	XLOC_041181	--	intronic_lncRNA	1.0567	0.226206	0.293112	0
LNC_001837	XLOC_041182	--	intronic_lncRNA	0.735591	0.513759	0.087709	0.434844
LNC_001830	XLOC_041134	--	antisense_lncRNA	0.378917	0.779091	0.852897	1.27829
LNC_001831	XLOC_041145	--	intronic_lncRNA	0.72662	0.50689	0	0.240523
LNC_001832	XLOC_041154	--	intronic_lncRNA	0.281592	0.565473	0.169588	0.690622
LNC_001833	XLOC_041155	--	intronic_lncRNA	0.347743	0.483489	0.391819	0.403774
LNC_001838	XLOC_041183	--	intronic_lncRNA	1.39371	0.649309	0.098937	0.128902
LNC_001839	XLOC_041183	--	intronic_lncRNA	0	1.56151	0.740265	0.000163
LNC_004758	XLOC_106418	--	intronic_lncRNA	0.136454	0.679533	0.081998	0.048632
LNC_004759	XLOC_106475	--	intronic_lncRNA	0.69415	0.365455	1.05438	1.12418
LNC_004756	XLOC_106416	--	intronic_lncRNA	0.230673	0.219867	0.545824	0.162756
LNC_004757	XLOC_106417	--	intronic_lncRNA	0.893557	0	0.191498	0.388951
LNC_004754	XLOC_106393	--	intronic_lncRNA	1.04911	0.954791	0.422767	0.451708
LNC_004755	XLOC_106399	--	intronic_lncRNA	0.614521	0.812464	0.318516	0.44403
LNC_004752	XLOC_106272	--	intronic_lncRNA	0	0.132018	0.245721	0.634312
LNC_004753	XLOC_106355	--	intronic_lncRNA	0.546191	0	0	0
LNC_004750	XLOC_106269	--	intronic_lncRNA	0.585989	0.314467	0.483438	0.564286
LNC_004751	XLOC_106270	--	intronic_lncRNA	0.064882	0	0.787759	0.177291
LNC_006000	XLOC_142652	--	intronic_lncRNA	0.808928	0.807491	1.01168	1.72719
LNC_006001	XLOC_142653	--	intronic_lncRNA	0.373317	0.356239	0.609991	0.178794
LNC_006101	XLOC_145984	--	intronic_lncRNA	1.44734	1.70567	1.26681	1.70234
LNC_006100	XLOC_145971	--	lincRNA	0.862004	0.118426	0.219806	0
LNC_006103	XLOC_146009	--	intronic_lncRNA	0.325606	0.569303	0.504197	1.05003
LNC_006102	XLOC_145984	--	intronic_lncRNA	10.6205	8.24588	6.29352	3.26979
LNC_006105	XLOC_146034	--	intronic_lncRNA	0.792967	0.445514	0.59102	0.550393
LNC_006104	XLOC_146034	--	intronic_lncRNA	0.086448	0	0.108976	0
LNC_006008	XLOC_142787	--	intronic_lncRNA	0.271877	0	0.982482	0.498984
LNC_006107	XLOC_146036	--	intronic_lncRNA	1.09714	0.119095	0.343684	0.419326
LNC_006009	XLOC_142814	--	intronic_lncRNA	0.447169	0.277841	0.340861	0.757972
LNC_006106	XLOC_146035	--	intronic_lncRNA	0.731874	0.423808	1.11504	0.749718
LNC_006440	XLOC_154376	--	intronic_lncRNA	0.529933	0.70992	0.722703	1.35573
LNC_006441	XLOC_154376	--	intronic_lncRNA	1.13658	0.640369	0.44997	0.050077
LNC_006442	XLOC_154954	--	intronic_lncRNA	0.157067	0.665913	0.559968	0.41896
LNC_006443	XLOC_154957	--	intronic_lncRNA	0.27649	0.14517	0.372561	0.474477
LNC_006444	XLOC_154979	--	intronic_lncRNA	0	0	0	0.888086
LNC_006445	XLOC_154991	--	antisense_lncRNA	3.16411	1.87956	0.740062	0.490763
LNC_000879	XLOC_019126	--	intronic_lncRNA	0.464619	0.519422	0.515071	0.388504
LNC_000878	XLOC_019125	--	intronic_lncRNA	0.290385	0.118205	0	0.567046
LNC_000877	XLOC_019025	--	lincRNA	0.889266	0.14962	0	0
LNC_000876	XLOC_018939	--	lincRNA	0	0.412347	0.575009	0.44386
LNC_000875	XLOC_018811	--	intronic_lncRNA	0.12317	0.209272	0.112518	0.650036
LNC_000874	XLOC_018811	--	intronic_lncRNA	0.223957	0.09059	0.60207	0
LNC_000873	XLOC_018747	--	intronic_lncRNA	0.562337	0.285642	0.505562	0.219345
LNC_000872	XLOC_018709	--	lincRNA	0.758212	0	0	0.225287
LNC_000871	XLOC_018691	--	intronic_lncRNA	0.692055	0.697408	0.383055	0.57547
LNC_000870	XLOC_018614	--	intronic_lncRNA	0.830418	0.370249	0.704377	1.12974
LNC_000727	XLOC_014815	--	intronic_lncRNA	0.548384	0.757599	0.234329	0.930275
LNC_000726	XLOC_014685	--	intronic_lncRNA	0.626397	0.626104	1.39969	0.707596
LNC_000725	XLOC_014590	--	intronic_lncRNA	0.635082	0.414785	0.543357	0.041655
LNC_000724	XLOC_014590	--	intronic_lncRNA	0.071847	0.867866	0.018567	0.486893
LNC_000723	XLOC_014524	--	intronic_lncRNA	1.39986	0.946823	1.5782	0.87084
LNC_000722	XLOC_014502	--	intronic_lncRNA	1.79603	1.26279	1.4329	1.65718
LNC_000721	XLOC_014434	--	intronic_lncRNA	0.14264	0.644282	0.011945	0.018791
LNC_000720	XLOC_014429	--	intronic_lncRNA	0.991558	0.717481	0.804252	1.07142
LNC_005939	XLOC_140307	--	intronic_lncRNA	0.37129	0.748506	0.963413	0.750604
LNC_005938	XLOC_140285	--	intronic_lncRNA	0.544696	0.790824	0.602793	0.58004
LNC_000729	XLOC_014835	--	lincRNA	0.589458	0	0	0.051119
LNC_000728	XLOC_014816	--	intronic_lncRNA	0.82205	0.379896	1.7669	0.749454
LNC_002581	XLOC_059881	--	intronic_lncRNA	0.604147	0.230391	0.581494	0.789709
LNC_002580	XLOC_059836	--	intronic_lncRNA	0.085452	0.208132	0.649507	0.496128
LNC_002583	XLOC_059887	--	intronic_lncRNA	0.630018	0	0	0.144071
LNC_002582	XLOC_059881	--	intronic_lncRNA	0.236941	0.349029	0.373085	0.896034
LNC_002585	XLOC_059936	--	intronic_lncRNA	1.02496	0.631593	0.981669	0.615208
LNC_002584	XLOC_059888	--	intronic_lncRNA	0	0	0.506712	0
LNC_002587	XLOC_059954	--	intronic_lncRNA	0.021137	0	0.534703	0.075595
LNC_002586	XLOC_059940	--	intronic_lncRNA	0.735624	0.37754	0.314168	0.47948
LNC_002589	XLOC_059955	--	intronic_lncRNA	0.367831	0.133475	0.854782	0.14213
LNC_002588	XLOC_059954	--	intronic_lncRNA	1.34314	0.973956	1.10095	1.73744
LNC_001439	XLOC_031291	--	antisense_lncRNA	0.576533	0.207209	0	0.085137
LNC_006421	XLOC_153987	--	antisense_lncRNA	0.322492	0.28425	0.411006	0.457114
LNC_003191	XLOC_073655	--	lincRNA	63.4215	0	0.088579	1.30506
LNC_003190	XLOC_073655	--	lincRNA	44.0833	0	0	0
LNC_003193	XLOC_073680	--	intronic_lncRNA	0.23098	0.200523	2.17314	4.52498
LNC_003192	XLOC_073656	--	intronic_lncRNA	0.119523	0	0.567501	0.307156
LNC_003195	XLOC_073719	--	lincRNA	0.627305	0.065648	0.070362	0
LNC_003194	XLOC_073680	--	intronic_lncRNA	0.465474	0.476806	0.9039	1.32078
LNC_003197	XLOC_073804	--	lincRNA	0.672797	0	0	0
LNC_003196	XLOC_073779	--	intronic_lncRNA	1.0685	0.906641	0.251347	0.655713
LNC_003199	XLOC_073851	--	intronic_lncRNA	0.67831	0.14109	0.347421	0.363725
LNC_003198	XLOC_073847	--	intronic_lncRNA	0.578404	0	0.221225	0
LNC_000597	XLOC_011287	--	intronic_lncRNA	0	0.783158	0	0.048424
LNC_001588	XLOC_034441	--	intronic_lncRNA	0	0.591761	0.543687	0
LNC_001589	XLOC_034442	--	intronic_lncRNA	0.36489	0.157607	0.642239	0.382852
LNC_001584	XLOC_034420	--	intronic_lncRNA	0.099844	0.522141	0.230824	0.321198
LNC_001585	XLOC_034425	--	lincRNA	0.385537	0.26295	0.763993	0.499846
LNC_001586	XLOC_034438	--	intronic_lncRNA	0.633639	0.194629	0.416091	0.275528
LNC_001587	XLOC_034440	--	intronic_lncRNA	0	0.722256	0.104381	0.280598
LNC_001580	XLOC_034316	--	intronic_lncRNA	0.673249	0.338078	0.801382	1.21897
LNC_001581	XLOC_034360	--	intronic_lncRNA	0.592149	0.179124	0.304037	0.40584
LNC_001582	XLOC_034384	--	intronic_lncRNA	5.81105	6.18683	8.40828	8.51616
LNC_001583	XLOC_034411	--	intronic_lncRNA	0.956735	0.810393	1.01489	1.08184
LNC_005458	XLOC_125960	--	intronic_lncRNA	0.424793	0.048914	0.191662	0.498668
LNC_005459	XLOC_126000	--	intronic_lncRNA	0.667324	0.451821	0.654487	0.772327
LNC_005456	XLOC_125743	--	intronic_lncRNA	1.57682	0.653402	1.57465	0.951487
LNC_005457	XLOC_125941	--	intronic_lncRNA	0.114204	0	0.546614	0.276797
LNC_005454	XLOC_125708	--	intronic_lncRNA	0.25936	0	0.560182	0.140126
LNC_001056	XLOC_022846	--	intronic_lncRNA	0.540741	0.225703	0	0
LNC_001057	XLOC_022851	--	intronic_lncRNA	0.57163	0.209224	0.552395	0.771528
LNC_001054	XLOC_022823	--	intronic_lncRNA	0.230275	0.479165	0	0.429864
LNC_001055	XLOC_022832	--	intronic_lncRNA	2.71839	1.71051	2.78754	2.553
LNC_001052	XLOC_022769	--	intronic_lncRNA	0.125233	0.332272	0.592747	0.829062
LNC_001053	XLOC_022805	--	intronic_lncRNA	0.854469	1.03814	0.659692	1.01413
LNC_001050	XLOC_022726	--	lincRNA	0.03781	0.054409	0.436454	0.116679
LNC_001051	XLOC_022758	--	intronic_lncRNA	0.404139	0.552374	0.761978	0.349333
LNC_005452	XLOC_125706	--	intronic_lncRNA	1.44323	0.73413	0.448653	1.03539
LNC_001058	XLOC_022892	--	intronic_lncRNA	0	0.78026	0	0
LNC_001059	XLOC_022915	--	intronic_lncRNA	0.299569	0.559902	0.644002	0.490341
LNC_005450	XLOC_125679	--	lincRNA	0.096231	0.273886	0.614019	0.934567
LNC_005451	XLOC_125706	--	intronic_lncRNA	2.20027	1.4527	1.76353	1.804
LNC_001139	XLOC_024814	--	lincRNA	0.729661	0	0	0
LNC_001138	XLOC_024809	--	intronic_lncRNA	0.597388	0	0.301867	0.047701
LNC_001135	XLOC_024808	--	intronic_lncRNA	1.31537	0.572524	1.10441	0.975004
LNC_001134	XLOC_024807	--	lincRNA	0.552448	0.074958	0	0
LNC_001137	XLOC_024809	--	intronic_lncRNA	0.305797	0.608105	0.036587	0.196214
LNC_001136	XLOC_024809	--	intronic_lncRNA	0.006292	0.09777	0.097175	0.508957
LNC_001131	XLOC_024752	--	intronic_lncRNA	0.420058	0.204861	0.408256	0.453187
LNC_001130	XLOC_024745	--	intronic_lncRNA	0	0.520827	0.403575	0.318486
LNC_001133	XLOC_024790	--	lincRNA	0	0	0.455433	0
LNC_001132	XLOC_024762	--	intronic_lncRNA	0.700953	0.383346	0.46076	0.472914
LNC_003759	XLOC_080447	--	intronic_lncRNA	0.587038	0.63403	0.53265	0.376953
LNC_003758	XLOC_080446	--	intronic_lncRNA	0.116259	0.289997	0.352285	0.234816
LNC_003757	XLOC_080445	--	intronic_lncRNA	0.122452	0.586773	0.301593	0.137394
LNC_003756	XLOC_080398	--	intronic_lncRNA	0.082896	0.069474	0	0.464519
LNC_003755	XLOC_080390	--	intronic_lncRNA	1.5345	0.207883	0.117396	0.336654
LNC_003754	XLOC_080366	--	intronic_lncRNA	0.689429	0.257195	1.72973	1.48065
LNC_003753	XLOC_080353	--	lincRNA	0	0	0.240535	0.850447
LNC_003752	XLOC_080352	--	lincRNA	0	0	0.512414	0
LNC_003751	XLOC_080344	--	intronic_lncRNA	0.875445	0.807075	0.832852	0.877178
LNC_003750	XLOC_080339	--	intronic_lncRNA	0.048124	0.041375	0.835412	1.17793
LNC_005342	XLOC_122294	--	lincRNA	0.659874	0.146073	0.763678	0.205992
LNC_005343	XLOC_122424	--	intronic_lncRNA	0	0.328378	0.314869	0.690635
LNC_000260	XLOC_003746	--	intronic_lncRNA	0.809966	0.13084	0	0.258798
LNC_005341	XLOC_122267	--	lincRNA	0.382438	0.433015	0.306024	0.429537
LNC_005346	XLOC_122629	--	intronic_lncRNA	1.07942	0	0.433385	0.311544
LNC_005347	XLOC_122674	--	intronic_lncRNA	0.293408	0	0.900629	0
LNC_005344	XLOC_122427	--	intronic_lncRNA	0.068823	0	0.360398	0.748303
LNC_005345	XLOC_122604	--	lincRNA	0	0.513268	0	0
LNC_005348	XLOC_122751	--	intronic_lncRNA	0.576175	0.137972	0.724227	0.103443
LNC_005349	XLOC_122788	--	intronic_lncRNA	0.22716	0.194512	0.692154	0.369201
LNC_002808	XLOC_065252	--	intronic_lncRNA	0.156617	0.617697	0.455174	0.251588
LNC_002809	XLOC_065292	--	intronic_lncRNA	0.635898	0.144637	0	0
LNC_002804	XLOC_065224	--	intronic_lncRNA	0	2.62857	1.57021	0
LNC_002805	XLOC_065230	--	intronic_lncRNA	0.356344	0.073944	0.736379	0
LNC_002806	XLOC_065238	--	intronic_lncRNA	0.116603	0.831454	0	0.147553
LNC_002807	XLOC_065248	--	lincRNA	0	0	0.075312	0.717549
LNC_002800	XLOC_065196	--	lincRNA	0.594214	0	0	0.122958
LNC_002801	XLOC_065218	--	intronic_lncRNA	0	0.61921	0.143198	0.749851
LNC_002802	XLOC_065222	--	intronic_lncRNA	29.9947	55.8449	47.0354	58.6265
LNC_002803	XLOC_065224	--	intronic_lncRNA	1.27497	2.445	0	2.69059
LNC_005694	XLOC_133265	--	lincRNA	0	0.199196	0.490021	0
LNC_005695	XLOC_133282	--	intronic_lncRNA	1.76244	2.09808	1.48892	0.637096
LNC_005696	XLOC_133305	--	intronic_lncRNA	0.766816	0.489204	0.745259	1.07868
LNC_005697	XLOC_133306	--	intronic_lncRNA	0.550614	0.531983	0.960371	0.66923
LNC_005690	XLOC_133176	--	intronic_lncRNA	0.230909	0.095709	0.778357	0.294041
LNC_005691	XLOC_133176	--	intronic_lncRNA	0.402016	0	0.233791	0.48129
LNC_005692	XLOC_133241	--	intronic_lncRNA	0.491173	0.44601	0.785039	0
LNC_005693	XLOC_133242	--	intronic_lncRNA	2.02176	0.425758	0.66908	0.512498
LNC_005698	XLOC_133386	--	intronic_lncRNA	1.96729	1.9066	1.08326	1.6961
LNC_005699	XLOC_133386	--	intronic_lncRNA	0.723748	1.04745	0.610418	1.20779
LNC_006059	XLOC_144390	--	intronic_lncRNA	0.450656	0.327957	0.903616	1.0314
LNC_006058	XLOC_144343	--	intronic_lncRNA	0.051103	0.558748	0.648077	0.336465
LNC_006053	XLOC_144267	--	lincRNA	0.806337	0	0	0
LNC_006052	XLOC_144115	--	intronic_lncRNA	0.276266	0.590414	0.46622	0.901319
LNC_006051	XLOC_144114	--	intronic_lncRNA	0.233787	0.059335	0.706286	0.598419
LNC_006050	XLOC_144114	--	intronic_lncRNA	0.143386	0.485825	0.052969	0.403342
LNC_006057	XLOC_144342	--	intronic_lncRNA	0.4666	0.510346	0.412705	0.293801
LNC_006056	XLOC_144318	--	intronic_lncRNA	0	0.046618	0.437337	0.636789
LNC_006055	XLOC_144302	--	intronic_lncRNA	0	0	0.398062	0
LNC_006054	XLOC_144294	--	intronic_lncRNA	0.452178	0.288524	0.753385	0.344273
LNC_004565	XLOC_100308	--	intronic_lncRNA	0.517037	0	0	0
LNC_004564	XLOC_100300	--	intronic_lncRNA	0.292288	0.538791	0.327687	0.312232
LNC_004567	XLOC_100351	--	intronic_lncRNA	0.876862	0.832425	1.42565	1.12799
LNC_004566	XLOC_100313	--	intronic_lncRNA	0.401254	0.053855	0.362819	0.557438
LNC_004561	XLOC_100293	--	intronic_lncRNA	0.345194	0.075526	0.472571	0.589532
LNC_004560	XLOC_100290	--	intronic_lncRNA	2.42028	0.950129	0.908734	1.02601
LNC_004563	XLOC_100294	--	intronic_lncRNA	0.907558	0.882651	0.609772	0.794173
LNC_004562	XLOC_100293	--	intronic_lncRNA	0	0.486287	0	0.106996
LNC_004569	XLOC_100368	--	intronic_lncRNA	0.569167	0.066012	0.073508	0
LNC_004568	XLOC_100354	--	intronic_lncRNA	0.129702	1.13654	0.122308	0.26727
LNC_005586	XLOC_130055	--	intronic_lncRNA	0.851297	0.613503	0.787988	0.868893
LNC_002248	XLOC_051510	--	intronic_lncRNA	0.027489	0.363557	0.097087	0.487507
LNC_002249	XLOC_051512	--	intronic_lncRNA	0.107955	0.067017	0.510557	0
LNC_002242	XLOC_051422	--	intronic_lncRNA	0.533112	0.292269	0.584874	0.543068
LNC_002243	XLOC_051423	--	intronic_lncRNA	0.323369	0.734969	0.537663	0.709904
LNC_002240	XLOC_051373	--	antisense_lncRNA	0.05623	0.098659	0	0.529487
LNC_002241	XLOC_051378	--	intronic_lncRNA	0.233452	0.229047	0.471599	0
LNC_002246	XLOC_051491	--	intronic_lncRNA	0.078111	0.156235	0.237435	0.509382
LNC_002247	XLOC_051509	--	intronic_lncRNA	0.204347	0	0.801558	0.08436
LNC_002244	XLOC_051435	--	lincRNA	0	0	0.615344	0
LNC_002245	XLOC_051436	--	intronic_lncRNA	0.703251	0.501769	0.738455	0.840194
LNC_003038	XLOC_069892	--	lincRNA	0.38484	0.161158	0.619866	0.728523
LNC_003039	XLOC_069940	--	intronic_lncRNA	0.973845	0.544753	0.568091	0.786853
LNC_003032	XLOC_069474	--	intronic_lncRNA	0.462052	0.646728	0.57729	0.65481
LNC_003033	XLOC_069490	--	intronic_lncRNA	0.13112	0.610228	0.087518	0.070621
LNC_003030	XLOC_069367	--	intronic_lncRNA	0.26303	0.524881	0.380446	0.179919
LNC_003031	XLOC_069474	--	intronic_lncRNA	0.760824	0.599183	1.05103	0.755062
LNC_003036	XLOC_069679	--	lincRNA	0.902239	0.178966	0	0.457515
LNC_003037	XLOC_069879	--	intronic_lncRNA	0	0.468582	0.398062	0.270635
LNC_003034	XLOC_069537	--	intronic_lncRNA	0.470305	0	0.286793	0.303969
LNC_003035	XLOC_069543	--	intronic_lncRNA	0.991355	0.93224	0.570646	0.241986
LNC_005108	XLOC_116893	--	intronic_lncRNA	1.19902	0.740989	0.942416	0.689324
LNC_000469	XLOC_008292	--	intronic_lncRNA	0.042735	0.462376	0.662793	0.666891
LNC_004987	XLOC_113653	--	intronic_lncRNA	1.63362	1.44518	1.55658	1.70509
LNC_000464	XLOC_008233	--	intronic_lncRNA	0.394577	0.671126	0.557573	0.504894
LNC_004985	XLOC_113641	--	intronic_lncRNA	0.270718	0.098374	0.219466	0.495742
LNC_004984	XLOC_113445	--	intronic_lncRNA	0.980123	0	0	0
LNC_004983	XLOC_113438	--	intronic_lncRNA	0.998923	0.32625	0.370604	0.225871
LNC_004982	XLOC_113437	--	intronic_lncRNA	0.530695	0.369514	0.499534	0.775931
LNC_004981	XLOC_113434	--	intronic_lncRNA	0.602776	0.182306	0.495077	0
LNC_000465	XLOC_008234	--	intronic_lncRNA	0	0.164046	0.582697	0.300794
LNC_005106	XLOC_116867	--	intronic_lncRNA	0	0.789075	0.154482	0.714957
LNC_004989	XLOC_113670	--	intronic_lncRNA	0.811919	0.353893	0.328236	0.643339
LNC_004988	XLOC_113666	--	intronic_lncRNA	0.174647	0.424171	0	0.412186
LNC_005107	XLOC_116869	--	intronic_lncRNA	0.110618	0.796134	0.421147	0.578364
LNC_005100	XLOC_116773	--	intronic_lncRNA	0.565767	0.211291	0.353924	0.10549
LNC_005101	XLOC_116774	--	intronic_lncRNA	0.327336	0.306875	0.424623	0
LNC_002639	XLOC_061014	--	lincRNA	0.497048	0.575151	0	0
LNC_002638	XLOC_061011	--	lincRNA	0.545818	0	0	0
LNC_000462	XLOC_008230	--	intronic_lncRNA	0.197409	0.132057	0.340575	0.513205
LNC_002633	XLOC_060956	--	intronic_lncRNA	0.176909	0	0.196456	0.474025
LNC_002632	XLOC_060920	--	intronic_lncRNA	0.585168	0.599584	0.601625	0.408355
LNC_002631	XLOC_060909	--	intronic_lncRNA	0.054947	0	0.440012	0.099706
LNC_005103	XLOC_116782	--	intronic_lncRNA	0	1.87065	2.54318	1.16893
LNC_002637	XLOC_061002	--	lincRNA	0.540741	0	0	0
LNC_002636	XLOC_060972	--	intronic_lncRNA	0.323047	0.304669	0.358592	0.494536
LNC_002635	XLOC_060971	--	intronic_lncRNA	0.339189	0.217682	0.08964	0.521212
LNC_002634	XLOC_060967	--	intronic_lncRNA	0.210115	0.421031	0.82897	0.366447
LNC_004363	XLOC_095074	--	lincRNA	0.098172	0.135489	0.359374	0.463432
LNC_004362	XLOC_095034	--	lincRNA	0.625958	0.133585	0.356544	0.372234
LNC_004361	XLOC_094997	--	intronic_lncRNA	0.016898	0.265841	0.034679	0.040319
LNC_004360	XLOC_094997	--	intronic_lncRNA	0.488546	0.102198	0.330618	0.574214
LNC_004367	XLOC_095246	--	intronic_lncRNA	0.233296	0.354551	0.392736	0
LNC_004366	XLOC_095233	--	intronic_lncRNA	0.690574	0	0.009803	0
LNC_004365	XLOC_095233	--	intronic_lncRNA	0	0.555281	0.880956	0.821251
LNC_004364	XLOC_095206	--	intronic_lncRNA	0.149077	0.358098	0.128893	0.850724
LNC_004369	XLOC_095263	--	lincRNA	0	0	0.611988	0.102094
LNC_004368	XLOC_095247	--	intronic_lncRNA	0.36219	0.370012	0.673979	0.662378
LNC_001858	XLOC_041279	--	intronic_lncRNA	0.170169	0.102099	0.463663	0.384944
LNC_001859	XLOC_041280	--	intronic_lncRNA	0	0.298904	0.494294	0.862861
LNC_001856	XLOC_041262	--	intronic_lncRNA	0.434247	0.476707	0.240218	0.321666
LNC_001857	XLOC_041278	--	intronic_lncRNA	0.580824	0.228903	0.572123	0.343024
LNC_001854	XLOC_041254	--	intronic_lncRNA	0.813206	0.393351	0.77202	0.678039
LNC_001855	XLOC_041255	--	intronic_lncRNA	0.888704	0.58234	0.961759	0.389459
LNC_001852	XLOC_041240	--	intronic_lncRNA	0	1.76216	1.59138	1.77771
LNC_001853	XLOC_041248	--	intronic_lncRNA	0	0	0.424439	0.051988
LNC_001850	XLOC_041231	--	antisense_lncRNA	0.658585	0.566682	0	0
LNC_001851	XLOC_041233	--	intronic_lncRNA	0.48835	0.356526	0.61979	0.689607
LNC_004770	XLOC_106582	--	lincRNA	3.11165	1.17376	1.60147	1.73472
LNC_004771	XLOC_106582	--	lincRNA	0.902211	0	0.921639	1.54667
LNC_004772	XLOC_106582	--	lincRNA	0.414222	0.424834	0	1.057
LNC_004773	XLOC_106688	--	intronic_lncRNA	2.24995	0.649684	0.720661	0.687892
LNC_004774	XLOC_106694	--	antisense_lncRNA	0.230679	0.119668	0.13352	0.48743
LNC_004775	XLOC_106705	--	intronic_lncRNA	0.784148	1.08648	0.73761	0.23809
LNC_004776	XLOC_106712	--	intronic_lncRNA	0	0	0.684283	0
LNC_004777	XLOC_106749	--	intronic_lncRNA	0.104026	0.39372	0.607399	0.888502
LNC_004778	XLOC_106750	--	intronic_lncRNA	0.539032	0.172079	0.787233	0.453697
LNC_004779	XLOC_106783	--	intronic_lncRNA	1.42566	0.685181	0.079549	0.224211
LNC_000099	XLOC_000756	--	lincRNA	1.0778	0	0	0.352681
LNC_005578	XLOC_129560	--	intronic_lncRNA	7.54196	1.88329	0.644821	0.550838
LNC_000091	XLOC_000619	--	lincRNA	9.01792	20.0348	5.72808	16.7784
LNC_005570	XLOC_129297	--	intronic_lncRNA	0.228217	0.227895	0.195889	0.640323
LNC_000093	XLOC_000621	--	lincRNA	7.97908	10.5176	12.6224	20.428
LNC_005572	XLOC_129373	--	intronic_lncRNA	0.493351	0.367624	0.791538	0.63663
LNC_000095	XLOC_000638	--	lincRNA	1.25947	0	0.29357	0.508279
LNC_000094	XLOC_000622	--	lincRNA	0.079237	1.58633	21.0635	16.2318
LNC_000097	XLOC_000727	--	lincRNA	1.14036	0.239726	0	0.982196
LNC_000096	XLOC_000686	--	lincRNA	0.236934	1.21594	0.098318	0.223414
LNC_002031	XLOC_045486	--	intronic_lncRNA	0.793642	0	0.198127	0.321666
LNC_002030	XLOC_045470	--	intronic_lncRNA	0.705859	0.378543	0.041506	0
LNC_002033	XLOC_045535	--	intronic_lncRNA	0.035684	0.502494	0.480381	0.746106
LNC_002032	XLOC_045487	--	intronic_lncRNA	0.113049	0	0.166327	0.716966
LNC_002035	XLOC_045563	--	intronic_lncRNA	1.00618	0.542725	0.387089	0.46171
LNC_002034	XLOC_045542	--	intronic_lncRNA	0.935531	1.14451	0.511465	0.589377
LNC_002037	XLOC_045730	--	intronic_lncRNA	0.535931	0.076719	0.36264	0.326514
LNC_002036	XLOC_045592	--	intronic_lncRNA	0.984941	1.04704	0.813127	0.513026
LNC_002039	XLOC_045735	--	intronic_lncRNA	0.045848	0.500858	0.065441	0.632665
LNC_002038	XLOC_045732	--	intronic_lncRNA	0.270828	0	0	0
LNC_003201	XLOC_073933	--	lincRNA	0.170092	0.269689	0.427412	0.604013
LNC_003200	XLOC_073895	--	intronic_lncRNA	1.64701	0.766294	0.454056	0.707294
LNC_003203	XLOC_073956	--	lincRNA	0.349192	0	0	0.524803
LNC_003202	XLOC_073936	--	intronic_lncRNA	0	0.094645	0.646834	0.223075
LNC_003205	XLOC_074038	--	intronic_lncRNA	0.054788	0.273142	0.198333	0.597183
LNC_003204	XLOC_073986	--	intronic_lncRNA	0.557267	0.402176	0.778857	0.738564
LNC_003207	XLOC_074075	--	intronic_lncRNA	1.35152	0.230085	0.900865	0.833448
LNC_003206	XLOC_074042	--	intronic_lncRNA	0	0	0.18582	0.516079
LNC_003209	XLOC_074213	--	intronic_lncRNA	1.49063	0.888625	0.8744	0.886103
LNC_003208	XLOC_074088	--	intronic_lncRNA	0	0	0.637619	0
LNC_000891	XLOC_019317	--	intronic_lncRNA	30.3484	15.4957	26.2169	23.9516
LNC_000890	XLOC_019317	--	antisense_lncRNA	0.410146	0.087456	0.4298	6.92426
LNC_000893	XLOC_019351	--	intronic_lncRNA	0.56101	0.652634	0.935289	0.666614
LNC_000892	XLOC_019321	--	intronic_lncRNA	0.571943	0.602679	0.846657	1.08021
LNC_000895	XLOC_019453	--	intronic_lncRNA	0.136807	0.314298	0.831806	0.893122
LNC_000894	XLOC_019383	--	intronic_lncRNA	0	0	0.287778	0.435982
LNC_000897	XLOC_019498	--	intronic_lncRNA	0.763808	0.389599	0.492169	0.494586
LNC_000896	XLOC_019497	--	intronic_lncRNA	0.299641	0.50373	0.136743	0.409475
LNC_000899	XLOC_019513	--	intronic_lncRNA	0	0.330795	0.178598	0.399098
LNC_000898	XLOC_019498	--	intronic_lncRNA	0.582053	0.218851	0.518976	1.0353
LNC_006347	XLOC_152226	--	intronic_lncRNA	0.588492	0.51709	0.7221	0.563443
LNC_006346	XLOC_152226	--	intronic_lncRNA	2.80004	1.57001	1.25442	0.871414
LNC_006345	XLOC_152226	--	intronic_lncRNA	0.361845	1.20576	0.363983	0.245208
LNC_006344	XLOC_152210	--	intronic_lncRNA	0.077778	4.16667	10.0558	9.48766
LNC_001423	XLOC_030959	--	intronic_lncRNA	0.441004	0.351319	0.508363	1.01993
LNC_001422	XLOC_030956	--	intronic_lncRNA	0.505475	0.884279	0.408446	0.084398
LNC_006341	XLOC_152177	--	intronic_lncRNA	0.22633	3.0022	0.128277	0.429884
LNC_006340	XLOC_152177	--	intronic_lncRNA	0	0	1.99093	0
LNC_006439	XLOC_154376	--	intronic_lncRNA	1.875	0	0.408875	0.227514
LNC_006438	XLOC_154371	--	intronic_lncRNA	0.89343	0.405668	0.87306	1.09402
LNC_001429	XLOC_031220	--	intronic_lncRNA	0.000563	0.518362	0.284681	0.630535
LNC_001428	XLOC_031202	--	intronic_lncRNA	0.506368	0.503758	0.117587	0.66541
LNC_005919	XLOC_139513	--	intronic_lncRNA	0	0.65755	0	0
LNC_005918	XLOC_139513	--	intronic_lncRNA	0	0.548531	0	0
LNC_005913	XLOC_139470	--	intronic_lncRNA	0	0	0	0.57422
LNC_005912	XLOC_139470	--	intronic_lncRNA	0.488484	0.822875	0.216568	0.268457
LNC_005911	XLOC_139453	--	intronic_lncRNA	0.611153	0.592706	0.453629	0.433917
LNC_005910	XLOC_139452	--	intronic_lncRNA	0.628531	0.232552	0.244524	0.299519
LNC_005917	XLOC_139499	--	intronic_lncRNA	0.715304	0.394927	0.716785	0.687897
LNC_005916	XLOC_139479	--	intronic_lncRNA	0	0.685031	0	0
LNC_005915	XLOC_139478	--	intronic_lncRNA	1.28324	0	0	0
LNC_005914	XLOC_139478	--	intronic_lncRNA	0.657386	0.617839	0.827552	1.02372
LNC_001078	XLOC_023255	--	intronic_lncRNA	0	0	0.543617	0.006101
LNC_001079	XLOC_023299	--	intronic_lncRNA	0.282046	0.710006	0.273486	1.05661
LNC_001070	XLOC_023082	--	antisense_lncRNA	0.382023	0.974224	0.094004	0.00276
LNC_001071	XLOC_023082	--	antisense_lncRNA	0.832841	0.265354	1.43274	1.36658
LNC_001072	XLOC_023083	--	intronic_lncRNA	0	0	0.042322	1.09858
LNC_001073	XLOC_023086	--	intronic_lncRNA	1.10558	0.452684	1.08145	1.07832
LNC_001074	XLOC_023111	--	intronic_lncRNA	0	0	0.587801	0.162718
LNC_001075	XLOC_023204	--	lincRNA	0.216363	0.70546	0.159064	0.300858
LNC_001076	XLOC_023204	--	lincRNA	0.228378	1.09244	0.411057	0.543035
LNC_001077	XLOC_023255	--	intronic_lncRNA	0.752113	0.613583	0.308255	0.979493
LNC_001117	XLOC_024258	--	intronic_lncRNA	0.348136	0.274229	0.122518	0
LNC_001116	XLOC_024245	--	intronic_lncRNA	0.531728	0.5651	0.647767	0.613434
LNC_001115	XLOC_024216	--	intronic_lncRNA	0	0	0.303694	0.400469
LNC_001114	XLOC_024213	--	antisense_lncRNA	0	0.406794	0.814267	0.641066
LNC_001113	XLOC_024174	--	intronic_lncRNA	0	0	0.146022	0.629506
LNC_001112	XLOC_023949	--	intronic_lncRNA	0.411507	0	0.111859	0.42069
LNC_001111	XLOC_023948	--	intronic_lncRNA	0.784009	0.02103	0.071115	0.053327
LNC_001110	XLOC_023826	--	intronic_lncRNA	0.277237	0.207635	0.934568	0.356614
LNC_001119	XLOC_024288	--	lincRNA	1.07157	0	0.053376	0
LNC_001118	XLOC_024274	--	intronic_lncRNA	0.750351	0.342187	0.702617	0.593437
LNC_000309	XLOC_004461	--	intronic_lncRNA	4.36272	4.17309	3.71593	3.99691
LNC_000308	XLOC_004455	--	intronic_lncRNA	2.18322	1.23413	2.35314	2.82056
LNC_000301	XLOC_004304	--	intronic_lncRNA	0.698519	0.711007	0.971216	1.18626
LNC_000300	XLOC_004303	--	intronic_lncRNA	0.841898	0.707334	0.86033	1.04166
LNC_000303	XLOC_004319	--	intronic_lncRNA	0.341122	0.338407	0.087121	0.429538
LNC_000302	XLOC_004319	--	intronic_lncRNA	0.239653	0.572834	0.06738	0.050365
LNC_000305	XLOC_004439	--	intronic_lncRNA	158.188	150.467	0.41515	1.29552
LNC_000304	XLOC_004320	--	intronic_lncRNA	0.938621	0.438119	0	0.490762
LNC_000307	XLOC_004452	--	intronic_lncRNA	0.199002	0.447871	0.453391	0.332429
LNC_000306	XLOC_004449	--	intronic_lncRNA	0.202333	0.272911	0.484852	0.193703
LNC_002798	XLOC_065149	--	intronic_lncRNA	0.679084	0	0	0
LNC_002799	XLOC_065194	--	intronic_lncRNA	1.67646	2.1482	1.68607	1.98139
LNC_002794	XLOC_065017	--	intronic_lncRNA	1.28138	1.54032	1.00039	1.23938
LNC_002795	XLOC_065027	--	intronic_lncRNA	0.822366	0.837949	0.462215	0.703492
LNC_002796	XLOC_065069	--	intronic_lncRNA	0	0.139723	0.622833	0
LNC_002797	XLOC_065104	--	intronic_lncRNA	0	0.84465	0	0
LNC_002790	XLOC_064888	--	intronic_lncRNA	0.372714	0	0.005312	0
LNC_002791	XLOC_064917	--	intronic_lncRNA	0.628797	0.126775	0.906743	0
LNC_002792	XLOC_064944	--	intronic_lncRNA	0	0.200603	0.339708	0.847145
LNC_002793	XLOC_064953	--	intronic_lncRNA	0.614045	0.806467	0.572807	0.334581
LNC_005364	XLOC_123271	--	intronic_lncRNA	0.231963	0	0	0.589144
LNC_000245	XLOC_003406	--	intronic_lncRNA	1.33267	1.68824	0.852834	0.853146
LNC_005366	XLOC_123278	--	intronic_lncRNA	0.279347	0	0	0.359046
LNC_005367	XLOC_123286	--	intronic_lncRNA	0.67211	0.25477	0.54491	0.108963
LNC_000240	XLOC_003336	--	intronic_lncRNA	1.18665	0.71208	0.658547	0.38063
LNC_005361	XLOC_123204	--	intronic_lncRNA	0.069707	0	0.042544	1.58838
LNC_000242	XLOC_003355	--	intronic_lncRNA	0.854214	0	0	0
LNC_000243	XLOC_003358	--	intronic_lncRNA	0	0.253459	0.592733	0.068954
LNC_005368	XLOC_123288	--	intronic_lncRNA	0.257515	0	0.406678	0
LNC_000249	XLOC_003513	--	intronic_lncRNA	0.839331	1.11094	1.29132	0.849754
LNC_002866	XLOC_066067	--	intronic_lncRNA	0.514246	1.06509	1.18881	1.20322
LNC_002867	XLOC_066068	--	intronic_lncRNA	0.190475	0.380553	0.912481	0.971614
LNC_002864	XLOC_066060	--	intronic_lncRNA	0.481101	1.46692	0.299091	0.200697
LNC_002865	XLOC_066067	--	intronic_lncRNA	0.736631	0.038337	0.095693	0.298629
LNC_002862	XLOC_065940	--	intronic_lncRNA	0.276257	0.135445	0.158219	0.437957
LNC_002863	XLOC_065944	--	intronic_lncRNA	0	0	0.347292	0.780694
LNC_002860	XLOC_065844	--	lincRNA	0.474404	1.02195	0.461811	0.132816
LNC_002861	XLOC_065890	--	intronic_lncRNA	0.959954	0.545201	0.47817	0.696802
LNC_002868	XLOC_066110	--	intronic_lncRNA	0.575015	0	0.172579	0
LNC_002869	XLOC_066159	--	intronic_lncRNA	0	0.611073	0	0
LNC_004095	XLOC_088611	--	intronic_lncRNA	0.525171	0.199998	0.566895	0.161942
LNC_004094	XLOC_088610	--	intronic_lncRNA	0.536031	0.597029	0.189618	0.622005
LNC_004097	XLOC_088627	--	intronic_lncRNA	0.507682	0	0.186654	0.148066
LNC_004096	XLOC_088612	--	intronic_lncRNA	0.221982	0.910319	0.81941	0.83045
LNC_004091	XLOC_088576	--	intronic_lncRNA	1.03798	0.971567	0.962568	0.932665
LNC_004090	XLOC_088570	--	intronic_lncRNA	0.304896	0	0.03166	0.681426
LNC_004093	XLOC_088608	--	intronic_lncRNA	0	0	0.194252	0.48717
LNC_004092	XLOC_088578	--	intronic_lncRNA	1.27118	1.71669	2.02066	1.19177
LNC_004099	XLOC_088646	--	intronic_lncRNA	0	0	0.776988	0
LNC_004098	XLOC_088643	--	intronic_lncRNA	0	0	0.665014	0.105401
LNC_000938	XLOC_020154	--	intronic_lncRNA	0.576666	0.720033	0.491047	0.368531
LNC_000939	XLOC_020158	--	intronic_lncRNA	0.388148	0.723622	0.264796	0.519245
LNC_006039	XLOC_143759	--	intronic_lncRNA	0.211744	0.553441	0	0
LNC_006038	XLOC_143719	--	intronic_lncRNA	0	0.459784	0.522381	0
LNC_000932	XLOC_020086	--	intronic_lncRNA	0.575216	0.223137	0.209901	0.68054
LNC_000933	XLOC_020087	--	intronic_lncRNA	0.552405	0.448165	0.798128	0.622468
LNC_000930	XLOC_020067	--	intronic_lncRNA	0.722107	0	0	0.135639
LNC_000931	XLOC_020084	--	intronic_lncRNA	0.344189	0.434995	0.535637	0.208554
LNC_000936	XLOC_020109	--	lincRNA	0.007256	1.39644	0	0.454393
LNC_000937	XLOC_020153	--	intronic_lncRNA	0	0.767353	0.16052	0.361441
LNC_000934	XLOC_020109	--	lincRNA	0.401527	0.031894	0.657853	0
LNC_000935	XLOC_020109	--	lincRNA	0.175283	0	0.645995	0.363461
LNC_004549	XLOC_099804	--	intronic_lncRNA	0.107053	0	0.645603	0.345665
LNC_004548	XLOC_099778	--	intronic_lncRNA	0	0	0.407265	0
LNC_004547	XLOC_099770	--	intronic_lncRNA	8.81369	5.54549	4.43023	4.93615
LNC_004546	XLOC_099706	--	intronic_lncRNA	0.913888	1.37714	0.58872	0.97187
LNC_004545	XLOC_099701	--	lincRNA	0.131222	0	0.624146	0.102763
LNC_004544	XLOC_099675	--	intronic_lncRNA	0.36497	0.25774	0.982875	0.516885
LNC_004543	XLOC_099489	--	lincRNA	0	0.543744	0	0
LNC_004542	XLOC_099460	--	intronic_lncRNA	0.018399	0.18805	0	0
LNC_004541	XLOC_099425	--	intronic_lncRNA	0.390502	0.515579	0.803951	0.688198
LNC_004540	XLOC_099422	--	intronic_lncRNA	0.565463	0	0	0.274104
LNC_001687	XLOC_036978	--	intronic_lncRNA	0.023612	0.005859	0.370808	0
LNC_001686	XLOC_036910	--	intronic_lncRNA	0	0.257556	0.633714	0
LNC_001685	XLOC_036849	--	lincRNA	0.273462	0.150727	0.346151	0.442599
LNC_001684	XLOC_036789	--	intronic_lncRNA	0.736506	0.886758	0.570565	0.327065
LNC_001683	XLOC_036767	--	lincRNA	0	0.224749	0.519594	0.246955
LNC_001682	XLOC_036705	--	antisense_lncRNA	0	0	0.412683	0.051663
LNC_001681	XLOC_036681	--	intronic_lncRNA	0.523737	0.368619	1.7089	1.80875
LNC_001680	XLOC_036681	--	intronic_lncRNA	0.654456	0.248793	0.743258	0.702796
LNC_001689	XLOC_036984	--	intronic_lncRNA	2.80247	2.34246	2.36475	3.16807
LNC_001688	XLOC_036978	--	intronic_lncRNA	0.447263	0.985843	0.222386	0.782249
LNC_006248	XLOC_150040	--	intronic_lncRNA	0.185803	0.725204	0.323536	0.082572
LNC_002268	XLOC_052163	--	intronic_lncRNA	0.795864	0.122347	0.00733	0.070805
LNC_002269	XLOC_052197	--	intronic_lncRNA	0	0	0.443125	0.400959
LNC_002264	XLOC_052122	--	intronic_lncRNA	0.306197	0.221971	0.485033	0.717139
LNC_002265	XLOC_052135	--	lincRNA	0.339319	0	0.066784	0.556436
LNC_002266	XLOC_052149	--	intronic_lncRNA	7.83827	3.79963	4.46117	4.95398
LNC_002267	XLOC_052151	--	intronic_lncRNA	0.617586	0	0.884007	0.872827
LNC_002260	XLOC_052076	--	intronic_lncRNA	0.932126	0.578812	0.382658	0.477602
LNC_002261	XLOC_052084	--	intronic_lncRNA	0.19955	0.269407	0.463871	0.919865
LNC_002262	XLOC_052105	--	intronic_lncRNA	0.709588	0.234822	0.428961	0.08628
LNC_002263	XLOC_052121	--	intronic_lncRNA	0.791737	0.225506	0.547884	0.316005
LNC_003018	XLOC_069035	--	intronic_lncRNA	0.092153	0.097342	0.484494	0
LNC_003019	XLOC_069063	--	intronic_lncRNA	0.037604	0.101755	0.569118	0.743742
LNC_003014	XLOC_069009	--	intronic_lncRNA	0.618132	0.141593	0.171572	0.272819
LNC_003015	XLOC_069009	--	intronic_lncRNA	0.508514	0.078061	0.091698	0.110373
LNC_003016	XLOC_069028	--	lincRNA	0.988025	0.24952	0.160586	0.76265
LNC_003017	XLOC_069034	--	intronic_lncRNA	0.611613	0.520591	0.159766	0.164353
LNC_003010	XLOC_068900	--	intronic_lncRNA	0.048334	0	0.80985	0
LNC_003011	XLOC_068939	--	lincRNA	0	0	0.736501	0.081018
LNC_003012	XLOC_068976	--	lincRNA	1.18108	0.307417	0	0.414869
LNC_003013	XLOC_068983	--	lincRNA	1.35568	1.00217	0.785008	0.89392
LNC_004842	XLOC_108816	--	intronic_lncRNA	0.978664	0.422805	0.600167	0.453359
LNC_002659	XLOC_061823	--	intronic_lncRNA	0.498096	0.314347	0.08964	0.537746
LNC_002658	XLOC_061821	--	intronic_lncRNA	0.380158	0.137929	0.33511	0.704541
LNC_004843	XLOC_108817	--	intronic_lncRNA	0.515961	0.731604	0.891157	0.277546
LNC_002655	XLOC_061754	--	intronic_lncRNA	0.89383	0.707053	0.89163	0.957638
LNC_002654	XLOC_061735	--	intronic_lncRNA	0.269776	0.14285	0.456665	0.631829
LNC_002657	XLOC_061759	--	antisense_lncRNA	0.485653	0.425748	0	0.189388
LNC_002656	XLOC_061756	--	intronic_lncRNA	0	0.259374	0.165781	0.690635
LNC_002651	XLOC_061537	--	intronic_lncRNA	0.066586	0.766238	0.437071	0.507288
LNC_002650	XLOC_061400	--	lincRNA	0.490076	0.470425	0.073321	0.058487
LNC_002653	XLOC_061651	--	lincRNA	0.656793	0	1.06013	0
LNC_002652	XLOC_061538	--	intronic_lncRNA	0.496229	0.211721	0	0.057272
LNC_004841	XLOC_108800	--	intronic_lncRNA	7.83484	7.43199	9.5185	10.2081
LNC_004846	XLOC_108867	--	intronic_lncRNA	0.753295	0.528137	0.945743	0.660915
LNC_004847	XLOC_108868	--	intronic_lncRNA	4.26444	1.10375	1.0713	1.73658
LNC_004336	XLOC_094228	--	lincRNA	0	0	0.577088	0.173429
LNC_004337	XLOC_094264	--	intronic_lncRNA	0.399298	0.636831	0.480645	0.700028
LNC_004305	XLOC_093647	--	intronic_lncRNA	0.626621	0.726292	0.300872	0.775213
LNC_004304	XLOC_093627	--	intronic_lncRNA	1.11142	0.724672	1.82658	1.02563
LNC_004307	XLOC_093676	--	intronic_lncRNA	0.155171	0.39563	0.20841	0.197549
LNC_004306	XLOC_093669	--	intronic_lncRNA	0	0	0.106581	0.497923
LNC_004301	XLOC_093569	--	intronic_lncRNA	0.905528	0.610987	0.488782	0.619416
LNC_004300	XLOC_093539	--	intronic_lncRNA	0	0	0.5017	0.25249
LNC_004303	XLOC_093625	--	intronic_lncRNA	0.376191	0.708323	0.947592	0.716919
LNC_004302	XLOC_093576	--	intronic_lncRNA	0.548459	0.240689	0.728063	0.522812
LNC_004309	XLOC_093735	--	intronic_lncRNA	1.69177	1.9368	0.842524	1.51121
LNC_004308	XLOC_093677	--	intronic_lncRNA	0.136427	0.562211	0.881516	0.07046
LNC_001870	XLOC_041631	--	antisense_lncRNA	0.204969	0.207977	0.514612	0.161588
LNC_001871	XLOC_041710	--	intronic_lncRNA	0.555065	0.520771	0.477448	0.45045
LNC_001872	XLOC_041750	--	intronic_lncRNA	0.910882	0.523197	1.07766	0.659367
LNC_001873	XLOC_041776	--	intronic_lncRNA	1.14678	0.812728	1.0917	1.18278
LNC_001874	XLOC_041799	--	intronic_lncRNA	0.307283	0.781772	1.26188	1.39861
LNC_001875	XLOC_041799	--	intronic_lncRNA	0.639207	0.158997	0.411597	0.31733
LNC_001876	XLOC_041808	--	intronic_lncRNA	2.17351	0.3306	0.895579	0.272841
LNC_001877	XLOC_041810	--	intronic_lncRNA	2.26127	1.81659	0.982953	1.37285
LNC_001878	XLOC_041851	--	intronic_lncRNA	0.45532	1.42875	1.11082	1.0249
LNC_001879	XLOC_041853	--	intronic_lncRNA	1.21475	0.814708	1.06282	0.636468
LNC_001308	XLOC_028594	--	intronic_lncRNA	0.545064	0.272969	0.193696	0.121544
LNC_001309	XLOC_028597	--	intronic_lncRNA	0	0.394019	1.09219	1.00246
LNC_003658	XLOC_078152	--	intronic_lncRNA	0.713112	0.19361	0.40894	0.324047
LNC_003659	XLOC_078153	--	intronic_lncRNA	0.277602	0.49152	0	0.386072
LNC_003652	XLOC_078123	--	intronic_lncRNA	1.05671	0.490839	0.872622	0.5483
LNC_003653	XLOC_078137	--	intronic_lncRNA	0.717081	0.220774	0.679036	1.33496
LNC_003650	XLOC_078100	--	intronic_lncRNA	2.41527	0.432167	0.820319	0.835026
LNC_003651	XLOC_078110	--	intronic_lncRNA	3.7286	1.22223	0.935468	0.812953
LNC_003656	XLOC_078150	--	intronic_lncRNA	0.472576	0.154152	0.498521	0.386694
LNC_003657	XLOC_078151	--	intronic_lncRNA	0	0	0.456143	0
LNC_003654	XLOC_078137	--	intronic_lncRNA	0.397241	1.02643	0.283381	0.093381
LNC_003655	XLOC_078144	--	intronic_lncRNA	0.163994	0.60416	0	0.3669
LNC_005553	XLOC_128747	--	lincRNA	0.810259	0.089472	0	0.116089
LNC_005552	XLOC_128690	--	lincRNA	0.446764	0.502469	0.492262	0.519036
LNC_005551	XLOC_128582	--	intronic_lncRNA	0.625308	0.007384	0.519263	0.370235
LNC_005550	XLOC_128582	--	intronic_lncRNA	0.417898	1.13896	0.671828	1.01768
LNC_005557	XLOC_128918	--	intronic_lncRNA	0	0	0.481591	0
LNC_005556	XLOC_128888	--	lincRNA	0.320777	0.243502	0.043485	0.437274
LNC_005555	XLOC_128875	--	lincRNA	0.130256	0.493252	0.453396	0.479065
LNC_005554	XLOC_128828	--	intronic_lncRNA	0.708257	0.698057	0.414961	0.714777
LNC_005559	XLOC_128944	--	intronic_lncRNA	0	0.610563	0	0
LNC_005558	XLOC_128940	--	intronic_lncRNA	1.34538	0	0	0
LNC_002019	XLOC_045406	--	intronic_lncRNA	0.58721	0.468459	0.408025	0
LNC_002018	XLOC_045406	--	intronic_lncRNA	0.627941	0.101692	0.65417	1.4048
LNC_002013	XLOC_045355	--	intronic_lncRNA	0.081016	0.001309	0	0.303265
LNC_002012	XLOC_045355	--	intronic_lncRNA	0.286923	0.360385	0.034335	0.0779
LNC_002011	XLOC_045329	--	intronic_lncRNA	0.876216	0.760643	0.852428	1.16726
LNC_002010	XLOC_045328	--	intronic_lncRNA	0.401229	0.364016	0.700354	0.692576
LNC_002017	XLOC_045390	--	intronic_lncRNA	0.272217	0	0.458256	0
LNC_002016	XLOC_045384	--	intronic_lncRNA	0.369092	0.510709	0.45948	0.894907
LNC_002015	XLOC_045356	--	intronic_lncRNA	0.697467	0.693725	1.00376	0.944466
LNC_002014	XLOC_045355	--	intronic_lncRNA	0.311284	0.256048	0.963527	0.373833
LNC_003229	XLOC_074920	--	intronic_lncRNA	1.16527	0.041004	0.223392	0.360678
LNC_003228	XLOC_074861	--	lincRNA	0	0	0.182143	0.62489
LNC_003223	XLOC_074786	--	intronic_lncRNA	1.30529	0.299935	0.021167	0.528719
LNC_003222	XLOC_074777	--	intronic_lncRNA	1.76149	1.83311	1.30619	1.11494
LNC_003221	XLOC_074750	--	intronic_lncRNA	0.630457	0.877173	0.359376	0.275641
LNC_003220	XLOC_074739	--	intronic_lncRNA	0.574621	0.63746	0.58221	0.608842
LNC_003227	XLOC_074838	--	intronic_lncRNA	0.504269	0	1.09122	0.315633
LNC_003226	XLOC_074791	--	intronic_lncRNA	0.378149	0.324019	0.304103	0.05189
LNC_003225	XLOC_074790	--	intronic_lncRNA	1.55247	0.693809	0.284541	0.099734
LNC_003224	XLOC_074789	--	intronic_lncRNA	0.599274	0.482331	0.258862	0.644332
LNC_000228	XLOC_003185	--	intronic_lncRNA	0.244935	0.281039	0.285166	0.649122
LNC_000229	XLOC_003187	--	intronic_lncRNA	0.536205	0.127331	0.254879	0.900256
LNC_000226	XLOC_003175	--	intronic_lncRNA	0.580454	0	0.102111	0
LNC_000227	XLOC_003184	--	intronic_lncRNA	0.150958	0	0.684048	0
LNC_000224	XLOC_003165	--	intronic_lncRNA	0	0.483328	0	0.359401
LNC_000225	XLOC_003165	--	intronic_lncRNA	0.772487	0.026334	0	0
LNC_005302	XLOC_121358	--	intronic_lncRNA	0.180514	0.321622	0.462905	0.349737
LNC_005303	XLOC_121361	--	intronic_lncRNA	12.365	16.9656	12.743	16.9665
LNC_005300	XLOC_121321	--	intronic_lncRNA	0.601854	1.76544	0.943798	1.76341
LNC_000221	XLOC_003149	--	intronic_lncRNA	0	0	0	0.394993
LNC_001311	XLOC_028627	--	intronic_lncRNA	0	0.955448	0	0
LNC_001310	XLOC_028597	--	intronic_lncRNA	1.818	1.23877	1.52661	1.00168
LNC_001313	XLOC_028741	--	intronic_lncRNA	0	0	0	0.897957
LNC_001312	XLOC_028634	--	intronic_lncRNA	2.62516	1.08564	5.29156	4.87985
LNC_001315	XLOC_028755	--	intronic_lncRNA	0.267058	0.765034	0.602786	0.620902
LNC_001314	XLOC_028743	--	lincRNA	0	0	0.456601	0
LNC_001317	XLOC_028792	--	intronic_lncRNA	0.387926	0.488396	0.336598	0.2612
LNC_001316	XLOC_028773	--	intronic_lncRNA	0.36373	0.280672	0.514587	0.634812
LNC_005979	XLOC_142243	--	intronic_lncRNA	0.117766	0	0.529751	0
LNC_005978	XLOC_141991	--	lincRNA	0.217646	0.951238	0.077205	0.077224
LNC_005975	XLOC_141854	--	intronic_lncRNA	0.89752	1.13258	0.670483	0
LNC_005974	XLOC_141796	--	intronic_lncRNA	1.40101	1.42576	0.897185	0.431606
LNC_005977	XLOC_141882	--	intronic_lncRNA	0	0	0	0.559085
LNC_005976	XLOC_141881	--	intronic_lncRNA	0	0	0	0.602092
LNC_005971	XLOC_141412	--	intronic_lncRNA	0	0	0.438984	0.432324
LNC_005970	XLOC_141401	--	lincRNA	0.315067	0.867688	0.046916	0.356968
LNC_005973	XLOC_141762	--	intronic_lncRNA	0.219162	0.369389	0.248086	0.156367
LNC_005972	XLOC_141762	--	intronic_lncRNA	0.388097	0.24725	0.741634	0.626297
LNC_001092	XLOC_023539	--	intronic_lncRNA	0	0	0.544069	0
LNC_001093	XLOC_023540	--	intronic_lncRNA	0.211717	0.20564	0.524249	0
LNC_001090	XLOC_023537	--	intronic_lncRNA	0.026942	0.554239	0.224474	0.303362
LNC_001091	XLOC_023538	--	intronic_lncRNA	0	0.892297	0.483362	0
LNC_001096	XLOC_023552	--	intronic_lncRNA	0.505475	0	0	0
LNC_001097	XLOC_023582	--	intronic_lncRNA	0.795414	0.718961	0.89437	1.27371
LNC_001094	XLOC_023542	--	intronic_lncRNA	0.362977	0.327317	1.41948	1.0164
LNC_001095	XLOC_023542	--	intronic_lncRNA	0.508632	0	0	0
LNC_001098	XLOC_023583	--	intronic_lncRNA	0.219633	0.292188	0.483581	0.466083
LNC_001099	XLOC_023584	--	lincRNA	0.408732	0.322291	0.445012	0.672382
LNC_003821	XLOC_082128	--	intronic_lncRNA	0	0.404171	0.599105	1.56012
LNC_003820	XLOC_082126	--	lincRNA	0	0.105798	0.465543	0.676967
LNC_003823	XLOC_082131	--	intronic_lncRNA	0.428428	0.147742	0.298058	0.341799
LNC_003822	XLOC_082129	--	intronic_lncRNA	0.321435	0.487496	0.739001	0.584931
LNC_003825	XLOC_082133	--	intronic_lncRNA	0.498047	0.390425	0.561827	0.491895
LNC_003824	XLOC_082132	--	intronic_lncRNA	0.113566	0	0.043654	0.523753
LNC_003827	XLOC_082258	--	intronic_lncRNA	0.36513	0.111752	0.449199	0.450931
LNC_003826	XLOC_082255	--	intronic_lncRNA	1.07782	0.803715	0.48276	0.526853
LNC_003829	XLOC_082269	--	intronic_lncRNA	2.47528	0.922748	1.69209	1.62217
LNC_003828	XLOC_082269	--	intronic_lncRNA	2.09862	1.71954	0.76542	1.99264
LNC_000323	XLOC_004657	--	intronic_lncRNA	0.056986	0	0	0.612215
LNC_000322	XLOC_004641	--	intronic_lncRNA	0.61151	2.60973	0.446684	0.009865
LNC_000321	XLOC_004641	--	intronic_lncRNA	0.458793	0.472649	0.205103	1.02163
LNC_000320	XLOC_004599	--	intronic_lncRNA	0.386018	0.209469	0.307661	0.85127
LNC_000327	XLOC_004720	--	intronic_lncRNA	0.880191	0.850219	0.692057	0.946885
LNC_000326	XLOC_004698	--	antisense_lncRNA	0.90591	0.853841	0	0
LNC_000325	XLOC_004680	--	intronic_lncRNA	0	0.568621	0	0
LNC_000324	XLOC_004657	--	intronic_lncRNA	1.78463	0	0	0
LNC_000329	XLOC_004995	--	intronic_lncRNA	0.552295	0.606414	0.130759	0.049578
LNC_000328	XLOC_004861	--	antisense_lncRNA	0	0.452785	0.306002	0.685326
LNC_003799	XLOC_081520	--	intronic_lncRNA	0.168248	0.503612	0.847205	0.426814
LNC_003798	XLOC_081514	--	intronic_lncRNA	0.761925	0.120985	0	0.207487
LNC_003793	XLOC_081344	--	intronic_lncRNA	1.9498	1.39236	1.17443	1.21259
LNC_003792	XLOC_081203	--	lincRNA	0.514421	0	0	0.175939
LNC_003791	XLOC_081145	--	intronic_lncRNA	0.809267	0.221831	0.827223	0.872242
LNC_003790	XLOC_081125	--	intronic_lncRNA	0	0.47542	0.025826	0
LNC_003797	XLOC_081513	--	intronic_lncRNA	0.185745	0.151044	0	0.466262
LNC_003796	XLOC_081425	--	antisense_lncRNA	0.972359	1.24247	1.69921	1.10855
LNC_003795	XLOC_081388	--	antisense_lncRNA	0.847044	0.181723	0.270162	0.351768
LNC_003794	XLOC_081377	--	intronic_lncRNA	1.16847	0.560717	1.35263	1.59465
LNC_005308	XLOC_121458	--	antisense_lncRNA	1.84136	1.5616	0.388216	0.345618
LNC_005309	XLOC_121471	--	intronic_lncRNA	0	0	0.019946	0.514874
LNC_005306	XLOC_121420	--	intronic_lncRNA	0	0	0.417932	0.563911
LNC_005307	XLOC_121420	--	intronic_lncRNA	2.00424	1.48386	2.18659	1.91431
LNC_005304	XLOC_121361	--	intronic_lncRNA	2.09403	2.51288	5.4283	5.01396
LNC_005305	XLOC_121387	--	intronic_lncRNA	0	0.668195	0	0
LNC_000222	XLOC_003164	--	intronic_lncRNA	0.03934	0.065439	0.080585	0.337911
LNC_000223	XLOC_003164	--	intronic_lncRNA	0.564399	0.773858	0.321605	0.193501
LNC_000220	XLOC_003101	--	intronic_lncRNA	0.246752	1.2458	1.07382	0.176325
LNC_005301	XLOC_121357	--	intronic_lncRNA	0.598713	0.421418	0.540082	0.254563
LNC_002848	XLOC_065595	--	intronic_lncRNA	0.357201	0.865664	1.50826	0.398646
LNC_002849	XLOC_065606	--	intronic_lncRNA	0.082308	0	0.421898	0.131234
LNC_002840	XLOC_065462	--	lincRNA	0	0	0.385016	0.555248
LNC_002841	XLOC_065462	--	lincRNA	0.651882	0.419805	0.109607	0.273423
LNC_002842	XLOC_065480	--	lincRNA	0.486228	0.144074	0	0.321601
LNC_002843	XLOC_065539	--	intronic_lncRNA	0	0.483328	0	0.78011
LNC_002844	XLOC_065552	--	intronic_lncRNA	0.333802	0.204889	0.464117	0.426275
LNC_002845	XLOC_065552	--	intronic_lncRNA	0.488463	0.662352	0.106399	0.260825
LNC_002846	XLOC_065570	--	intronic_lncRNA	0	0.432831	0.241238	0
LNC_002847	XLOC_065590	--	intronic_lncRNA	0.455254	0	0.391819	0.234685
LNC_006017	XLOC_143333	--	intronic_lncRNA	0	0	0	0.869688
LNC_006016	XLOC_143260	--	intronic_lncRNA	0	0	0.65247	0.326179
LNC_006015	XLOC_143240	--	intronic_lncRNA	0.522425	0.104066	0.124419	0.21684
LNC_006014	XLOC_143239	--	intronic_lncRNA	0.459235	0.313601	0.603117	0.70761
LNC_000918	XLOC_019918	--	intronic_lncRNA	1.06386	0.299973	0.747813	0.947613
LNC_000919	XLOC_019918	--	intronic_lncRNA	0.844094	0.380836	1.35562	1.04848
LNC_006011	XLOC_142904	--	lincRNA	0.830074	0.317833	0	0
LNC_006010	XLOC_142848	--	intronic_lncRNA	0.191919	0.201957	0.176479	0.620013
LNC_000914	XLOC_019854	--	intronic_lncRNA	0.383495	0.13239	0.363349	0.645098
LNC_000915	XLOC_019856	--	lincRNA	1.27352	0.979544	0.049705	0.074296
LNC_000916	XLOC_019858	--	lincRNA	0	0.333475	0	0.410159
LNC_000917	XLOC_019918	--	intronic_lncRNA	1.07787	1.31459	1.52388	0.809095
LNC_000910	XLOC_019772	--	intronic_lncRNA	0.382635	0.330706	0.539127	0.500557
LNC_000911	XLOC_019784	--	intronic_lncRNA	0	0.745944	0	0
LNC_000912	XLOC_019789	--	intronic_lncRNA	0	0.074341	0.199031	0.486575
LNC_000913	XLOC_019789	--	intronic_lncRNA	0	0.06281	0	0.637048
LNC_006243	XLOC_149835	--	intronic_lncRNA	1.09302	0.310008	0.199192	0.942213
LNC_006457	XLOC_155302	--	intronic_lncRNA	0.086767	0.996686	0	0.430893
LNC_006456	XLOC_155287	--	lincRNA	0	0.946569	0.094459	0.05962
LNC_000558	XLOC_010462	--	intronic_lncRNA	0.666876	0.241664	0.195714	0.138933
LNC_000559	XLOC_010467	--	intronic_lncRNA	0.630053	0	0.152665	0.203745
LNC_005074	XLOC_115819	--	intronic_lncRNA	0.261197	0.201251	0.41824	0.743099
LNC_005075	XLOC_115833	--	lincRNA	0	0	0	0.392997
LNC_005076	XLOC_115842	--	intronic_lncRNA	0.329061	0.626237	0.579288	0.148932
LNC_005077	XLOC_115855	--	lincRNA	0.749429	0.26284	0.146159	0.157948
LNC_005070	XLOC_115728	--	lincRNA	0.176073	0	0.349948	0.607484
LNC_000551	XLOC_010240	--	intronic_lncRNA	0.52959	0.410862	0.247188	0.158955
LNC_005896	XLOC_138896	--	intronic_lncRNA	0.294672	0.092651	0.150068	0.525147
LNC_005897	XLOC_138898	--	intronic_lncRNA	0.657918	0	0.267897	0.323207
LNC_005894	XLOC_138837	--	intronic_lncRNA	0	0.485069	0	0.634637
LNC_005895	XLOC_138838	--	intronic_lncRNA	0	0	0.258878	0.413304
LNC_005892	XLOC_138781	--	intronic_lncRNA	0.422668	0.143275	0.410577	0.819351
LNC_005072	XLOC_115731	--	intronic_lncRNA	0.791504	0	1.84006	1.03253
LNC_005890	XLOC_138780	--	intronic_lncRNA	0	0.037968	0	0.638625
LNC_005891	XLOC_138780	--	intronic_lncRNA	0.397659	0.273347	0.550524	0.016227
LNC_005073	XLOC_115792	--	lincRNA	0	0	0.416826	0.268253
LNC_005898	XLOC_138901	--	intronic_lncRNA	0.328273	0.09385	0.189993	0.437462
LNC_005899	XLOC_138902	--	intronic_lncRNA	0.506644	0.321611	0.180968	0.238703
LNC_002206	XLOC_050297	--	intronic_lncRNA	0.700683	0.587224	0.69183	0.617547
LNC_002207	XLOC_050433	--	lincRNA	5.43501	3.60305	4.25399	5.10872
LNC_002204	XLOC_050285	--	lincRNA	0.805577	0.749057	0.489469	0.77048
LNC_002205	XLOC_050285	--	lincRNA	0.956806	0	0.419487	1.06044
LNC_002202	XLOC_050223	--	lincRNA	0.531681	0.429271	0.833253	0.329851
LNC_002203	XLOC_050260	--	lincRNA	0.101625	0.202795	0.410588	0.480392
LNC_002200	XLOC_050216	--	lincRNA	0.238001	0.46913	0.6621	0.344535
LNC_002201	XLOC_050216	--	lincRNA	0.40099	0.065535	0.117489	0.752096
LNC_002208	XLOC_050434	--	lincRNA	0.070687	0.587414	0	0
LNC_002209	XLOC_050439	--	intronic_lncRNA	1.19594	1.55204	1.59655	1.75059
LNC_003076	XLOC_070589	--	intronic_lncRNA	0.142663	0.293667	0.416201	0.344198
LNC_003077	XLOC_070589	--	intronic_lncRNA	0.22919	0.087311	0.033082	0.091654
LNC_003074	XLOC_070587	--	intronic_lncRNA	0.466061	0.088653	0.253686	0.534456
LNC_003075	XLOC_070588	--	intronic_lncRNA	0.648521	0.394553	0.222253	0.106492
LNC_003072	XLOC_070571	--	intronic_lncRNA	0	0.745914	0.177585	0.177554
LNC_003073	XLOC_070586	--	intronic_lncRNA	0.140979	0.096344	0.506905	0.098815
LNC_003070	XLOC_070560	--	intronic_lncRNA	0.344231	1.4156	0.174356	0
LNC_003071	XLOC_070562	--	intronic_lncRNA	0.875762	0.857133	0.15696	0
LNC_005831	XLOC_137464	--	intronic_lncRNA	1.19686	0.474086	1.973	2.08476
LNC_003078	XLOC_070604	--	intronic_lncRNA	0.038526	0	0.002745	0.993014
LNC_003079	XLOC_070641	--	intronic_lncRNA	0	0	0.400323	0.054257
LNC_006452	XLOC_155232	--	intronic_lncRNA	0.538552	0.526796	0.075357	0.58608
LNC_005098	XLOC_116727	--	intronic_lncRNA	0	0.178197	0.550173	0.472004
LNC_005099	XLOC_116727	--	intronic_lncRNA	0	0.026389	0.090493	0.430704
LNC_005096	XLOC_116534	--	lincRNA	0.524306	0	0.080173	0.106252
LNC_005097	XLOC_116677	--	intronic_lncRNA	0.659096	0	0	0
LNC_005094	XLOC_116461	--	lincRNA	0	0.255504	0.310383	0
LNC_005095	XLOC_116502	--	lincRNA	0.185449	0	0.702889	0
LNC_005092	XLOC_116416	--	intronic_lncRNA	5.79149	14.2979	10.4675	13.494
LNC_005093	XLOC_116454	--	lincRNA	0.641364	0.501302	1.06851	0.617479
LNC_005090	XLOC_116372	--	intronic_lncRNA	1.18945	0.750357	0.570828	0.926249
LNC_005091	XLOC_116381	--	lincRNA	0	0	0.575853	0.108294
LNC_006451	XLOC_155232	--	intronic_lncRNA	0.257356	0.19678	0.968647	0.333089
LNC_006450	XLOC_155096	--	intronic_lncRNA	0.262634	0.084569	0.564976	0.583975
LNC_002677	XLOC_062342	--	intronic_lncRNA	0.595475	0.607707	0.805072	1.45302
LNC_002676	XLOC_062262	--	intronic_lncRNA	0.541693	0.324393	0.588479	0.829532
LNC_002675	XLOC_062260	--	intronic_lncRNA	0	0	1.15803	0.106255
LNC_002674	XLOC_062237	--	intronic_lncRNA	0.278187	0.727264	0.485419	0.176173
LNC_002673	XLOC_062167	--	intronic_lncRNA	0.531123	0.224152	0.566681	0.294938
LNC_002672	XLOC_062159	--	intronic_lncRNA	0.343349	0.596704	0	0.349716
LNC_002671	XLOC_062011	--	intronic_lncRNA	0.108045	0.206664	0.509455	0.436794
LNC_002670	XLOC_062010	--	intronic_lncRNA	0.1543	0.87077	0.825171	0.662985
LNC_002679	XLOC_062426	--	intronic_lncRNA	0.315896	0	0.142337	0.479594
LNC_002678	XLOC_062361	--	intronic_lncRNA	0.170113	0.213299	0.441045	0
LNC_004859	XLOC_109497	--	intronic_lncRNA	0.192847	0.26244	0.477152	0.524528
LNC_004858	XLOC_109496	--	intronic_lncRNA	0	0	0	0.404773
LNC_004329	XLOC_093956	--	intronic_lncRNA	0.611962	0.284995	0.591856	0.447707
LNC_004328	XLOC_093955	--	intronic_lncRNA	0.187379	0.255934	0.337	0.547904
LNC_004327	XLOC_093938	--	lincRNA	0	0.646382	0	0
LNC_004326	XLOC_093931	--	intronic_lncRNA	0.602644	0.112861	0.145851	0.235574
LNC_004853	XLOC_109093	--	intronic_lncRNA	0.576141	0.345737	0.91579	0.632695
LNC_004324	XLOC_093910	--	intronic_lncRNA	0.200715	0.694945	0.462225	0.657853
LNC_004855	XLOC_109172	--	intronic_lncRNA	0.229049	0.089519	0.94469	0.520142
LNC_004322	XLOC_093832	--	antisense_lncRNA	0.98565	0.457782	0	0.096927
LNC_004857	XLOC_109492	--	intronic_lncRNA	0.754705	0	0	0
LNC_004856	XLOC_109237	--	intronic_lncRNA	0.030375	0.022882	0.530908	0.504753
LNC_005806	XLOC_136696	--	lincRNA	0.361578	0.329168	0.106632	1.13508
LNC_005801	XLOC_136665	--	intronic_lncRNA	0.1444	0.487342	0.498883	0.618094
LNC_005800	XLOC_136632	--	intronic_lncRNA	0.46251	0.502661	0.417976	0
LNC_005803	XLOC_136678	--	intronic_lncRNA	0	0.185649	0.406678	0.201948
LNC_005802	XLOC_136666	--	intronic_lncRNA	0.641412	1.11018	0.840972	0.419329
LNC_003921	XLOC_084555	--	intronic_lncRNA	0.95855	0.95277	0.311412	0.410993
LNC_001324	XLOC_028880	--	intronic_lncRNA	1.13908	0.688986	0.938033	1.11374
LNC_001325	XLOC_028937	--	intronic_lncRNA	0.543584	0.178193	0.64152	0.806446
LNC_001326	XLOC_028940	--	intronic_lncRNA	0	0.554134	0.14959	0.218364
LNC_001327	XLOC_029047	--	intronic_lncRNA	0	0	0.449916	0.341527
LNC_001320	XLOC_028827	--	intronic_lncRNA	0.623374	0.20369	0.464676	0.12531
LNC_001321	XLOC_028831	--	intronic_lncRNA	0.8786	1.12973	1.11333	0.915065
LNC_001322	XLOC_028833	--	intronic_lncRNA	0	0	0.687384	0
LNC_001323	XLOC_028835	--	intronic_lncRNA	0.289234	0.278472	0.513903	0.481486
LNC_001328	XLOC_029074	--	intronic_lncRNA	3.41448	0.072551	2.1312	0.125584
LNC_001329	XLOC_029088	--	intronic_lncRNA	0.8094	1.00483	0.267558	0.680471
LNC_006430	XLOC_154050	--	intronic_lncRNA	0.465942	0.250127	0.539469	0.502524
LNC_006433	XLOC_154101	--	intronic_lncRNA	0.291977	0.131821	0.437887	0.474413
LNC_003678	XLOC_078630	--	intronic_lncRNA	0.576933	0.153641	0	0
LNC_003679	XLOC_078637	--	intronic_lncRNA	0.783884	0	0.202814	0.269826
LNC_003674	XLOC_078569	--	intronic_lncRNA	0.252732	0	0.203712	0.574068
LNC_003675	XLOC_078571	--	intronic_lncRNA	0.704459	0.101753	0.725171	0.20696
LNC_003676	XLOC_078614	--	intronic_lncRNA	1.19418	0.364864	1.20287	0.945316
LNC_003677	XLOC_078625	--	intronic_lncRNA	0	0	0.391427	0
LNC_003670	XLOC_078522	--	lincRNA	0.641041	0.959003	0	0
LNC_003671	XLOC_078546	--	intronic_lncRNA	1.93619	1.26555	1.76315	1.32895
LNC_003672	XLOC_078564	--	intronic_lncRNA	1.05025	1.44679	2.45611	2.51659
LNC_003673	XLOC_078569	--	intronic_lncRNA	0.74918	0.835592	0.90942	0
LNC_006432	XLOC_154069	--	intronic_lncRNA	0	0	0	0.30712
LNC_006435	XLOC_154176	--	intronic_lncRNA	0.631359	0.709434	0.841989	0.839425
LNC_006013	XLOC_143236	--	intronic_lncRNA	0.358702	0.193331	0.576403	0.818046
LNC_006012	XLOC_143131	--	lincRNA	0.260838	0.29489	0.419443	0.167539
LNC_005535	XLOC_127950	--	intronic_lncRNA	0.968546	0.489707	0.802723	0.731749
LNC_005534	XLOC_127823	--	intronic_lncRNA	1.24103	0.436244	0.359289	0.44851
LNC_005537	XLOC_127974	--	intronic_lncRNA	0.238809	0.116231	0.094445	0.470573
LNC_005536	XLOC_127974	--	intronic_lncRNA	0.277124	0.20622	0.621306	0.703943
LNC_005531	XLOC_127796	--	intronic_lncRNA	0.365636	0.024639	0.498579	0.508202
LNC_005530	XLOC_127753	--	intronic_lncRNA	0.349954	0.573696	0.55923	0.47693
LNC_005533	XLOC_127804	--	lincRNA	0.522748	0	0.124889	0
LNC_005532	XLOC_127797	--	intronic_lncRNA	0.235176	0.174324	0.607632	0.522075
LNC_005539	XLOC_128044	--	intronic_lncRNA	0.213264	0.425844	1.07138	0.70494
LNC_005538	XLOC_128017	--	lincRNA	1.19707	0.578925	0.248757	0.304858
LNC_002079	XLOC_046928	--	lincRNA	0.594084	0.76762	1.06919	0.33375
LNC_002078	XLOC_046920	--	lincRNA	0.929302	0.444387	0.826372	0.899377
LNC_002075	XLOC_046710	--	lincRNA	1.16085	0.721819	0.709648	0.974899
LNC_002074	XLOC_046705	--	intronic_lncRNA	0.071354	0.142862	0.218011	1.22588
LNC_002077	XLOC_046870	--	intronic_lncRNA	0.688335	0.162972	0.543668	0.944882
LNC_002076	XLOC_046730	--	intronic_lncRNA	0.343285	0.572001	0.53567	0.091215
LNC_002071	XLOC_046529	--	antisense_lncRNA	0.575541	0	0	0
LNC_002070	XLOC_046519	--	lincRNA	1.20617	0.117854	0.051234	0.212324
LNC_002073	XLOC_046705	--	intronic_lncRNA	0.500333	0.183649	1.23027	0.220699
LNC_002072	XLOC_046585	--	intronic_lncRNA	0.578366	0.359633	0.960877	0.346235
LNC_003249	XLOC_075119	--	lincRNA	2.56858	1.65885	1.51345	0.990602
LNC_003248	XLOC_075118	--	lincRNA	1.03882	0.905383	0.240324	0.524298
LNC_003245	XLOC_075117	--	lincRNA	2.93714	1.72288	0.937455	1.03168
LNC_003244	XLOC_075117	--	lincRNA	2.73755	0.089485	0.013187	0.010858
LNC_003247	XLOC_075117	--	lincRNA	2.27658	0.738426	0	0.014012
LNC_003246	XLOC_075117	--	lincRNA	10.7141	5.03323	2.93351	3.52404
LNC_003241	XLOC_075117	--	lincRNA	0.740868	0.702013	0.312019	0.227304
LNC_003240	XLOC_075117	--	lincRNA	0.35175	0.885803	0	0.096277
LNC_003243	XLOC_075117	--	lincRNA	1.3668	0.126663	0	0.023065
LNC_003242	XLOC_075117	--	lincRNA	0.880739	0.481104	0.717167	0.553405
LNC_006436	XLOC_154282	--	lincRNA	1.56346	0	0.099275	0.122218
LNC_004668	XLOC_103749	--	intronic_lncRNA	14.5143	22.1554	9.49343	12.5777
LNC_004669	XLOC_103756	--	intronic_lncRNA	0.809255	0	0.148666	0.35913
LNC_004662	XLOC_103611	--	intronic_lncRNA	0.498878	0.318043	0.296162	0.066145
LNC_004663	XLOC_103612	--	intronic_lncRNA	0.443577	0.564938	0.017019	0
LNC_004660	XLOC_103491	--	intronic_lncRNA	0.278132	0.036918	0.554616	0.317869
LNC_004661	XLOC_103588	--	intronic_lncRNA	0.203454	0.461923	0.30755	0
LNC_004666	XLOC_103749	--	intronic_lncRNA	2.93836	13.4382	13.3284	3.66534
LNC_004667	XLOC_103749	--	intronic_lncRNA	4.60614	3.30144	2.03825	5.58084
LNC_004664	XLOC_103612	--	intronic_lncRNA	0	0	0.530026	0.783181
LNC_004665	XLOC_103698	--	lincRNA	0.275356	0.504817	0.198868	0.287137
LNC_001522	XLOC_032783	--	intronic_lncRNA	0.531968	0.479433	0.344112	0.231364
LNC_001523	XLOC_032809	--	intronic_lncRNA	0.719975	0.980089	0.761821	0.61983
LNC_001520	XLOC_032770	--	intronic_lncRNA	0	0.609237	0	0
LNC_001521	XLOC_032774	--	intronic_lncRNA	0	0.681955	0.438516	0.537084
LNC_001526	XLOC_032956	--	intronic_lncRNA	0.353616	0.35448	1.00056	0.496147
LNC_001527	XLOC_032957	--	intronic_lncRNA	0.522561	0.207838	0.651023	0.130114
LNC_001524	XLOC_032821	--	intronic_lncRNA	0.041021	0.091183	0.736462	0.099284
LNC_001525	XLOC_032866	--	intronic_lncRNA	1.4252	0.753206	1.13119	1.20941
LNC_001528	XLOC_033253	--	intronic_lncRNA	0.394941	0.212808	0.588309	0.609236
LNC_001529	XLOC_033260	--	intronic_lncRNA	0.492529	0.118173	0.386642	1.03304
LNC_005957	XLOC_141079	--	lincRNA	1.33797	1.401	1.36705	1.27339
LNC_005956	XLOC_141041	--	intronic_lncRNA	0.372297	0.009351	0	0.019102
LNC_005955	XLOC_140975	--	lincRNA	0.747935	0	0	0
LNC_005954	XLOC_140923	--	intronic_lncRNA	1.06526	0.355578	0.97309	0.433869
LNC_005953	XLOC_140921	--	antisense_lncRNA	0.326571	0.08146	0.329854	0.065959
LNC_005952	XLOC_140670	--	intronic_lncRNA	0.471978	0.464891	0.192574	0.327828
LNC_005951	XLOC_140588	--	intronic_lncRNA	0.23962	0.13227	0.789703	0.519057
LNC_005950	XLOC_140572	--	intronic_lncRNA	0.580127	0.171461	0.24017	0.291129
LNC_005449	XLOC_125676	--	intronic_lncRNA	0	1.11372	0	0
LNC_005959	XLOC_141104	--	intronic_lncRNA	0.603591	0.551812	0.041939	0.606903
LNC_005448	XLOC_125586	--	intronic_lncRNA	2.72878	0.607713	2.52579	1.79185
LNC_005445	XLOC_125538	--	intronic_lncRNA	2.18047	1.85628	1.1149	1.00733
LNC_005444	XLOC_125538	--	intronic_lncRNA	0.000182	0.00354	0.051877	0.003276
LNC_000167	XLOC_001947	--	intronic_lncRNA	0.211797	0.280014	0.308474	0.61474
LNC_005446	XLOC_125558	--	intronic_lncRNA	0.006046	0.017002	0.121507	1.17392
LNC_005441	XLOC_125538	--	intronic_lncRNA	1.49162	1.31389	1.46684	1.27673
LNC_005440	XLOC_125527	--	intronic_lncRNA	0	1.13064	0.187617	0.647656
LNC_005443	XLOC_125538	--	intronic_lncRNA	0.214844	0.551022	0.885962	0.949964
LNC_004723	XLOC_105246	--	lincRNA	0	0	0	0.39136
LNC_005442	XLOC_125538	--	intronic_lncRNA	2.06395	0.089305	0.745905	1.12459
LNC_000693	XLOC_013800	--	intronic_lncRNA	5.05054	1.05509	2.97879	1.79207
LNC_000692	XLOC_013800	--	intronic_lncRNA	6.03081	1.02074	2.67826	1.7664
LNC_000691	XLOC_013769	--	intronic_lncRNA	0.607228	0.418609	1.15494	0.975775
LNC_000690	XLOC_013765	--	intronic_lncRNA	1.18171	0.532679	0.706455	0.480712
LNC_000697	XLOC_013805	--	intronic_lncRNA	0.00165	0.16669	0.316456	0.753695
LNC_000696	XLOC_013805	--	intronic_lncRNA	0.557747	0	0.008538	0.05602
LNC_000695	XLOC_013804	--	intronic_lncRNA	0.693671	0.305137	0.481857	0.392294
LNC_000694	XLOC_013803	--	intronic_lncRNA	0	0.721877	0.823543	0.288353
LNC_000699	XLOC_013938	--	intronic_lncRNA	0.378896	0	0.407595	0.357329
LNC_000698	XLOC_013937	--	intronic_lncRNA	0.562545	0	0	0
LNC_003809	XLOC_081816	--	lincRNA	1.48361	1.81867	0.667454	0.370155
LNC_003808	XLOC_081780	--	intronic_lncRNA	0.795498	0.904351	0.127275	0.180698
LNC_003803	XLOC_081673	--	intronic_lncRNA	0.197366	0.802385	0.148643	0.29406
LNC_003802	XLOC_081652	--	intronic_lncRNA	0	0	0	0.411958
LNC_003801	XLOC_081548	--	intronic_lncRNA	0.215568	0	0.312605	0.859751
LNC_003800	XLOC_081544	--	intronic_lncRNA	0.008655	0.500727	0.579166	0.330569
LNC_003807	XLOC_081689	--	intronic_lncRNA	0.336826	0.579078	0.718342	0.874732
LNC_003806	XLOC_081685	--	intronic_lncRNA	0.648693	0.95257	0.413413	0.589201
LNC_003805	XLOC_081677	--	intronic_lncRNA	0	0.616603	0.126086	0.287206
LNC_003804	XLOC_081676	--	intronic_lncRNA	0.86868	0.602183	1.11861	0.723758
LNC_000345	XLOC_005409	--	intronic_lncRNA	0.102137	0.523317	0.138673	0.202472
LNC_000344	XLOC_005407	--	intronic_lncRNA	1.23518	0	1.21156	0.971143
LNC_000347	XLOC_005519	--	intronic_lncRNA	0.484193	0.588704	0.004996	0
LNC_000346	XLOC_005519	--	intronic_lncRNA	2.39603	0.651897	0.361581	0.292698
LNC_000341	XLOC_005355	--	intronic_lncRNA	1.40795	0.433392	0.654938	0.773655
LNC_000340	XLOC_005152	--	intronic_lncRNA	0.166499	0	0	0.703041
LNC_000343	XLOC_005407	--	intronic_lncRNA	0.535712	0.059339	0.395508	0.41803
LNC_000342	XLOC_005379	--	intronic_lncRNA	0.800683	0	0	0.129375
LNC_000349	XLOC_005576	--	lincRNA	0.006327	0.02483	0.831452	0.579621
LNC_000348	XLOC_005563	--	lincRNA	0.265567	0.352067	0.4047	0.255238
LNC_005320	XLOC_121702	--	intronic_lncRNA	0.435074	0	0.393275	0.205777
LNC_005321	XLOC_121713	--	intronic_lncRNA	0	0	0.212898	0.639273
LNC_005322	XLOC_121758	--	intronic_lncRNA	0.57412	0.250619	0.115978	0.27057
LNC_005323	XLOC_121769	--	intronic_lncRNA	0.193385	0	0.276302	0.549745
LNC_005324	XLOC_121777	--	intronic_lncRNA	0.468547	0.117266	0.952359	0.493227
LNC_005325	XLOC_121842	--	antisense_lncRNA	0	0	0.277663	0.807879
LNC_005326	XLOC_121847	--	intronic_lncRNA	0.697868	0.290412	0.409862	0.806959
LNC_005327	XLOC_121848	--	intronic_lncRNA	0.714877	0.403505	0.711686	0.260907
LNC_005328	XLOC_121854	--	intronic_lncRNA	0.197165	0.634262	0.149417	0
LNC_005329	XLOC_121932	--	intronic_lncRNA	0.253758	0.653585	0.586408	0.585134
LNC_003426	XLOC_075207	--	lincRNA	1.03681	0.86761	0.199236	0.997543
LNC_004051	XLOC_087531	--	intronic_lncRNA	0	0	0	0.410159
LNC_004050	XLOC_087515	--	intronic_lncRNA	0	0	0.204297	0.529724
LNC_004053	XLOC_087543	--	lincRNA	0	0.150865	0.060204	0.48717
LNC_004052	XLOC_087543	--	lincRNA	0.156613	0.642441	0.256504	0.287459
LNC_004055	XLOC_087573	--	intronic_lncRNA	0.562871	0.45127	0.430699	0.57378
LNC_004054	XLOC_087553	--	intronic_lncRNA	0.569898	0	0.18578	0.249652
LNC_004057	XLOC_087683	--	lincRNA	0.087778	0.13482	0.373325	0.427949
LNC_004056	XLOC_087665	--	intronic_lncRNA	0.337963	0.562009	0.060686	0.499565
LNC_004059	XLOC_087716	--	intronic_lncRNA	0.218095	0.520173	0.421267	0
LNC_004058	XLOC_087715	--	intronic_lncRNA	0	0.150623	0.166762	0.695957
LNC_000976	XLOC_020917	--	intronic_lncRNA	0	0.569706	0.517021	1.56566
LNC_000977	XLOC_020931	--	intronic_lncRNA	0.549747	0.509728	0.711649	0.749506
LNC_000974	XLOC_020916	--	intronic_lncRNA	1.18446	0.958287	0.570875	0.958981
LNC_000975	XLOC_020917	--	intronic_lncRNA	0.22771	0.379324	1.96464	2.11945
LNC_000972	XLOC_020858	--	intronic_lncRNA	0	0.242885	0.240211	0
LNC_000973	XLOC_020876	--	lincRNA	0.690376	2.10919	0.188555	0.164357
LNC_000970	XLOC_020744	--	intronic_lncRNA	0.26415	0	1.00366	0.408085
LNC_000971	XLOC_020771	--	intronic_lncRNA	0.515982	0.166395	0.911982	0.943133
LNC_000978	XLOC_020990	--	intronic_lncRNA	0	0	0.850607	0
LNC_000979	XLOC_020991	--	intronic_lncRNA	0.198034	0.455254	0.32199	0.425397
LNC_004589	XLOC_101481	--	intronic_lncRNA	0.483289	0.41778	0.659365	0.861833
LNC_004588	XLOC_101475	--	intronic_lncRNA	0.372723	0.303193	0.500117	0.272393
LNC_004583	XLOC_100920	--	lincRNA	1.59633	0.701731	0.446834	0.38343
LNC_004582	XLOC_100541	--	intronic_lncRNA	0	0	0.618646	0.07159
LNC_004581	XLOC_100530	--	intronic_lncRNA	0.915164	0.222826	0.326792	0.212739
LNC_004580	XLOC_100528	--	intronic_lncRNA	0.479064	0.122878	0.455689	0.805961
LNC_004587	XLOC_101411	--	lincRNA	0.811866	0.062556	0	0
LNC_004586	XLOC_101229	--	lincRNA	1.30285	0.239766	0.11455	0.054238
LNC_004585	XLOC_101209	--	lincRNA	0.725479	0.180556	0.074913	0.029505
LNC_004584	XLOC_100920	--	lincRNA	0.987759	0	0.236104	0.48483
LNC_005933	XLOC_140159	--	intronic_lncRNA	0.237586	0.127192	0	0.411958
LNC_002196	XLOC_050092	--	intronic_lncRNA	0	0	0.544874	0.067524
LNC_002197	XLOC_050106	--	intronic_lncRNA	0.712326	2.93166	0.545431	1.12147
LNC_002194	XLOC_050056	--	lincRNA	0	0	0	0.527676
LNC_002195	XLOC_050059	--	intronic_lncRNA	0.110842	0.311824	0.615172	0.554132
LNC_002192	XLOC_050030	--	intronic_lncRNA	0.788228	0.992885	0.244597	0.385496
LNC_002193	XLOC_050030	--	intronic_lncRNA	0.358713	0.182131	0.367803	0.175133
LNC_002190	XLOC_050011	--	intronic_lncRNA	1.36955	1.55133	1.56201	1.18729
LNC_002191	XLOC_050029	--	intronic_lncRNA	0.342041	0.524039	0.160682	0.439536
LNC_002198	XLOC_050108	--	intronic_lncRNA	0	0.56038	0	0
LNC_002199	XLOC_050109	--	intronic_lncRNA	0.244928	0.08146	0.489064	0.66839
LNC_003586	XLOC_075948	--	intronic_lncRNA	0.280606	0.283725	0.663776	1.00484
LNC_003587	XLOC_075949	--	intronic_lncRNA	0.910426	0.420766	0.319233	0.756812
LNC_003584	XLOC_075904	--	intronic_lncRNA	0.325702	0	0.044096	0.554402
LNC_003585	XLOC_075905	--	intronic_lncRNA	0.637497	1.2001	0.770387	0.951382
LNC_003582	XLOC_075883	--	intronic_lncRNA	0.343448	0.170291	0.648236	0.800176
LNC_003583	XLOC_075891	--	intronic_lncRNA	0.180056	0.488617	0.277249	0.331917
LNC_003580	XLOC_075791	--	lincRNA	1.70688	0.868333	0.144233	0.213841
LNC_003581	XLOC_075882	--	intronic_lncRNA	0.240905	0	0.719075	0.297146
LNC_003588	XLOC_075960	--	lincRNA	0.499682	0	0	0
LNC_003589	XLOC_076023	--	intronic_lncRNA	0.3971	0.135548	0.867467	0.927464
LNC_002228	XLOC_051072	--	intronic_lncRNA	0	0	1.42359	0.569849
LNC_002229	XLOC_051073	--	intronic_lncRNA	0	0.895742	0	0
LNC_005934	XLOC_140170	--	intronic_lncRNA	0.672199	0.286416	0.309856	0.816348
LNC_002220	XLOC_050833	--	intronic_lncRNA	0.479116	0.746192	0.921225	0.741444
LNC_002221	XLOC_050840	--	intronic_lncRNA	0.149373	0.171185	0.945242	0.235058
LNC_002222	XLOC_050842	--	intronic_lncRNA	1.18359	0.250677	0.787187	1.46369
LNC_002223	XLOC_050898	--	intronic_lncRNA	0.202117	0.655468	0.810428	0.503755
LNC_002224	XLOC_050926	--	lincRNA	0	0	0	0.479038
LNC_002225	XLOC_050948	--	intronic_lncRNA	0.07046	0.50799	0.275491	0.137263
LNC_002226	XLOC_050957	--	intronic_lncRNA	0.168492	0	0.883151	0.570364
LNC_002227	XLOC_051065	--	lincRNA	0.557417	0.139212	0.144167	0.392738
LNC_003058	XLOC_070257	--	intronic_lncRNA	0.180265	0	0.046843	0.557527
LNC_003059	XLOC_070282	--	intronic_lncRNA	0.280315	0.612669	0	0
LNC_003050	XLOC_070205	--	intronic_lncRNA	0	0	0	0.41745
LNC_003051	XLOC_070216	--	intronic_lncRNA	0.862845	0.062141	0	0
LNC_003052	XLOC_070224	--	intronic_lncRNA	1.074	0.550025	0.494103	0.416983
LNC_003053	XLOC_070252	--	intronic_lncRNA	0	0	0.415675	0
LNC_003054	XLOC_070253	--	intronic_lncRNA	0.913988	0	0	0
LNC_003055	XLOC_070254	--	intronic_lncRNA	0.960814	0	0	0
LNC_003056	XLOC_070255	--	intronic_lncRNA	0.775062	0	0	0
LNC_003057	XLOC_070256	--	intronic_lncRNA	0.550992	0.274878	0	0.082352
LNC_000590	XLOC_011012	--	intronic_lncRNA	0.283812	0.26665	0.135378	0.54185
LNC_000473	XLOC_008377	--	intronic_lncRNA	0.313527	0.151698	0.528888	0.515762
LNC_000592	XLOC_011062	--	lincRNA	0.822512	0.216508	0.399668	0.54756
LNC_000593	XLOC_011171	--	lincRNA	0.298418	0.501229	0.627637	0.434458
LNC_000594	XLOC_011179	--	intronic_lncRNA	0.044738	0.508086	0.380244	0.232773
LNC_000595	XLOC_011281	--	intronic_lncRNA	0.88664	0.448331	0.557453	0.164935
LNC_000596	XLOC_011281	--	intronic_lncRNA	0.013517	0.158679	0	0.392369
LNC_005112	XLOC_116905	--	intronic_lncRNA	0.182853	0.853155	0.712636	0.59506
LNC_000598	XLOC_011398	--	intronic_lncRNA	0.587589	0.771303	0.716479	0.779586
LNC_000599	XLOC_011414	--	intronic_lncRNA	0.145015	0.534626	0.341959	0.493641
LNC_000471	XLOC_008358	--	intronic_lncRNA	0.722601	0.153652	0.181894	0
LNC_000470	XLOC_008311	--	intronic_lncRNA	0.108807	0.293486	0.136184	0.446699
LNC_005117	XLOC_117027	--	intronic_lncRNA	0.473054	0.517763	0.76625	0.716899
LNC_005116	XLOC_117022	--	antisense_lncRNA	0	0	0.251207	0.585945
LNC_005115	XLOC_117007	--	intronic_lncRNA	0.378551	0.086852	0.438439	0.635883
LNC_005114	XLOC_116940	--	intronic_lncRNA	26.3476	32.0993	38.5545	39.2775
LNC_000479	XLOC_008408	--	intronic_lncRNA	6.07178	15.2696	10.8199	10.9341
LNC_005893	XLOC_138833	--	intronic_lncRNA	0.218797	0.569818	0	0.078728
LNC_005118	XLOC_117068	--	intronic_lncRNA	2.53563	1.80211	1.70677	2.98195
LNC_001759	XLOC_038792	--	intronic_lncRNA	1.15525	1.07603	0.873638	0.931632
LNC_005362	XLOC_123217	--	lincRNA	1.08566	0	0.711477	0.545602
LNC_001751	XLOC_038723	--	intronic_lncRNA	0.295016	0.224773	0.335882	0.821343
LNC_001750	XLOC_038711	--	intronic_lncRNA	0	0	0.40425	0
LNC_001753	XLOC_038724	--	intronic_lncRNA	0.111073	0.406822	0.288472	0.539385
LNC_001752	XLOC_038724	--	intronic_lncRNA	0.151312	0	0.458074	0.340338
LNC_001755	XLOC_038784	--	intronic_lncRNA	1.07471	0.776877	1.23171	2.02614
LNC_001754	XLOC_038747	--	lincRNA	0.520411	0.150583	0.473435	0
LNC_001757	XLOC_038788	--	intronic_lncRNA	0.159276	0	0.947171	0.450652
LNC_001756	XLOC_038784	--	intronic_lncRNA	0	0	0.004542	0.446907
LNC_004873	XLOC_110520	--	lincRNA	0.492982	0.667484	0.433974	0.903203
LNC_004872	XLOC_110430	--	intronic_lncRNA	0.175746	0.302642	0.309813	0.662554
LNC_004871	XLOC_110134	--	intronic_lncRNA	0.087151	0.347242	0.344832	0.73578
LNC_004870	XLOC_110131	--	intronic_lncRNA	0.081414	0	0.394717	0.392456
LNC_004877	XLOC_110626	--	intronic_lncRNA	0.904239	0.452622	0.828905	0.736677
LNC_004876	XLOC_110561	--	lincRNA	0.941006	1.04192	0.999664	0.874378
LNC_004875	XLOC_110537	--	lincRNA	0.687974	0.083679	0	0
LNC_004874	XLOC_110522	--	intronic_lncRNA	0.636595	0.134129	0.05362	0
LNC_004879	XLOC_110662	--	intronic_lncRNA	0.571376	0.554689	0.39452	1.1583
LNC_004878	XLOC_110662	--	intronic_lncRNA	0.092309	0.107719	0.746722	0.305075
LNC_001348	XLOC_029378	--	antisense_lncRNA	0.48668	0	0	0
LNC_001349	XLOC_029381	--	intronic_lncRNA	1.0621	0.199093	0.178945	0.190838
LNC_001346	XLOC_029307	--	intronic_lncRNA	0	0	0	0.426938
LNC_001347	XLOC_029378	--	intronic_lncRNA	1.43663	0.539194	0.676579	0.757667
LNC_001344	XLOC_029240	--	lincRNA	0.297438	0.694009	0.475066	0.458125
LNC_001345	XLOC_029246	--	intronic_lncRNA	0.101271	0	0.16339	0.408814
LNC_001342	XLOC_029209	--	antisense_lncRNA	0.819597	1.97619	0.105439	0.743002
LNC_001343	XLOC_029234	--	intronic_lncRNA	1.02139	0.729765	2.48814	1.77442
LNC_001340	XLOC_029199	--	intronic_lncRNA	0.478884	0.262074	0.189511	0.068124
LNC_001341	XLOC_029200	--	intronic_lncRNA	0	0.115078	0.745576	0
LNC_003616	XLOC_077112	--	intronic_lncRNA	0.208368	0	0.544594	0.318533
LNC_003617	XLOC_077116	--	intronic_lncRNA	0.903044	0.159893	0.147009	0.175657
LNC_003614	XLOC_077033	--	intronic_lncRNA	0.702237	0.077852	0.125627	0.456604
LNC_003615	XLOC_077034	--	intronic_lncRNA	0.537459	0.224315	0.368686	0.139662
LNC_003612	XLOC_077018	--	intronic_lncRNA	0.353214	0.582594	0.623226	0.616663
LNC_003613	XLOC_077031	--	intronic_lncRNA	0.555984	0.837103	0.360754	0.403535
LNC_003610	XLOC_076963	--	lincRNA	0	0.759816	0	0
LNC_003611	XLOC_077012	--	lincRNA	0.438344	0	0.06461	0.18346
LNC_003618	XLOC_077123	--	intronic_lncRNA	0.94061	0.492684	0.342427	0.389948
LNC_003619	XLOC_077132	--	intronic_lncRNA	0.440157	0	0.326482	0.471653
LNC_001968	XLOC_044355	--	lincRNA	0	0	0.460503	0
LNC_001969	XLOC_044376	--	intronic_lncRNA	0.888201	1.29019	2.54153	1.32015
LNC_001962	XLOC_044137	--	intronic_lncRNA	0.509379	0.627434	0.242581	0.647249
LNC_001963	XLOC_044149	--	intronic_lncRNA	0	0.250624	0	0.500792
LNC_001960	XLOC_044135	--	intronic_lncRNA	1.32809	0.823247	0	0
LNC_001961	XLOC_044135	--	intronic_lncRNA	0.5279	0.651828	1.58791	1.89362
LNC_001966	XLOC_044315	--	intronic_lncRNA	1.93002	2.10575	2.49056	2.71372
LNC_001967	XLOC_044339	--	lincRNA	0.037812	0	0.214535	0.649434
LNC_001964	XLOC_044247	--	intronic_lncRNA	0.713517	0.117225	0.51816	0.866124
LNC_001965	XLOC_044314	--	intronic_lncRNA	0.953367	0	0	0
LNC_005519	XLOC_127524	--	intronic_lncRNA	0.816943	0.428831	0.876189	0.871329
LNC_005518	XLOC_127463	--	intronic_lncRNA	0.758993	1.21865	1.2638	2.07437
LNC_005517	XLOC_127460	--	intronic_lncRNA	0.186933	0	0.543686	0.525759
LNC_005516	XLOC_127457	--	intronic_lncRNA	0.17021	0.492805	0.140934	0.173119
LNC_005515	XLOC_127395	--	intronic_lncRNA	0.790029	0.212528	0	0.484992
LNC_005514	XLOC_127379	--	lincRNA	0.521766	0.414614	0.580381	1.12095
LNC_005513	XLOC_127374	--	intronic_lncRNA	0.097002	0	0.223381	0.688385
LNC_005512	XLOC_127370	--	intronic_lncRNA	0	0	0.442793	0.057744
LNC_005511	XLOC_127369	--	intronic_lncRNA	0	0	0.655402	0.26202
LNC_005510	XLOC_127350	--	intronic_lncRNA	0.106496	0.846065	1.36921	0.636558
LNC_005830	XLOC_137316	--	lincRNA	0	0.112344	0.420638	0
LNC_002057	XLOC_046218	--	lincRNA	0.296403	1.34507	0.082033	0
LNC_002056	XLOC_046213	--	intronic_lncRNA	0.077037	0.649605	0.266217	0.386078
LNC_002055	XLOC_046213	--	intronic_lncRNA	0.72756	0	0.286745	0
LNC_002054	XLOC_046213	--	intronic_lncRNA	0.44534	0.143848	0.412959	0.466091
LNC_002053	XLOC_046144	--	intronic_lncRNA	0.688839	0	1.03824	0.133952
LNC_002052	XLOC_046087	--	intronic_lncRNA	0.918536	0	0	0
LNC_002051	XLOC_046087	--	intronic_lncRNA	0.598715	0.698618	0.852336	1.00637
LNC_002050	XLOC_046033	--	intronic_lncRNA	0.457437	0.155671	0.522409	1.00339
LNC_002059	XLOC_046240	--	intronic_lncRNA	0.700546	2.72584	4.01182	4.83722
LNC_002058	XLOC_046237	--	intronic_lncRNA	0.078248	0	0.579892	0
LNC_003267	XLOC_075141	--	lincRNA	2.11392	0.054928	0.014445	0.037672
LNC_003266	XLOC_075141	--	lincRNA	1.21046	0	0	0
LNC_003265	XLOC_075141	--	lincRNA	3.32571	1.3838	1.33202	1.52694
LNC_003264	XLOC_075140	--	lincRNA	5.26792	1.93633	0.956251	1.2932
LNC_003263	XLOC_075138	--	lincRNA	1.46565	0	0.014302	0
LNC_003262	XLOC_075138	--	lincRNA	2.57513	1.10957	0.653411	0.244231
LNC_003261	XLOC_075136	--	lincRNA	1.61065	1.00305	0.22091	0.312015
LNC_003260	XLOC_075135	--	lincRNA	2.55682	1.08904	0.917877	0.679509
LNC_003269	XLOC_075141	--	lincRNA	3.56463	2.01412	1.148	1.1374
LNC_003268	XLOC_075141	--	lincRNA	0.109552	1.05749	0.030682	0.035069
LNC_006404	XLOC_153429	--	intronic_lncRNA	0.317924	0.165198	0.385714	0.447829
LNC_006405	XLOC_153616	--	intronic_lncRNA	0.762487	0.256634	0.410595	0.733771
LNC_006406	XLOC_153650	--	intronic_lncRNA	1.14495	0.244155	0.86948	0.810962
LNC_006407	XLOC_153683	--	intronic_lncRNA	0.608396	0	0	0
LNC_006400	XLOC_153404	--	intronic_lncRNA	0	0	0.654788	0
LNC_006401	XLOC_153425	--	intronic_lncRNA	0.434592	0.685184	1.18809	0.89198
LNC_006402	XLOC_153426	--	intronic_lncRNA	0.376503	0.985831	0.57282	0.366033
LNC_006403	XLOC_153428	--	intronic_lncRNA	0.488768	0	0.116619	0.483703
LNC_004648	XLOC_103289	--	intronic_lncRNA	0.236941	0.23641	0.444185	0.535993
LNC_004649	XLOC_103299	--	intronic_lncRNA	0.086088	0	0.20245	0.436867
LNC_004644	XLOC_103239	--	intronic_lncRNA	0.532212	0	0.42398	0.548444
LNC_004645	XLOC_103244	--	intronic_lncRNA	3.02388	2.05033	0.90879	0.924971
LNC_004646	XLOC_103244	--	intronic_lncRNA	28.0393	6.15716	26.2188	23.5522
LNC_004647	XLOC_103256	--	intronic_lncRNA	23.4867	6.99394	10.4175	10.2491
LNC_004640	XLOC_103133	--	intronic_lncRNA	0.1355	0.515099	0.509981	0.432655
LNC_004641	XLOC_103207	--	intronic_lncRNA	0.693523	0	0	0.241554
LNC_004642	XLOC_103207	--	intronic_lncRNA	0	0.141305	0.316208	0.533113
LNC_004643	XLOC_103208	--	intronic_lncRNA	0.159828	0.38334	0.643669	0.282301
LNC_001504	XLOC_032605	--	intronic_lncRNA	1.3942	23.3185	0	3.18952
LNC_001505	XLOC_032607	--	intronic_lncRNA	1.15212	1.63558	1.18541	1.04295
LNC_001506	XLOC_032613	--	intronic_lncRNA	3.76286	3.23701	1.88069	1.92685
LNC_001507	XLOC_032672	--	intronic_lncRNA	3.71149	5.08882	14.2234	13.5532
LNC_001500	XLOC_032605	--	intronic_lncRNA	1.86761	8.9927	0.012331	2.25033
LNC_001501	XLOC_032605	--	intronic_lncRNA	0	0	0	7.05086
LNC_001502	XLOC_032605	--	intronic_lncRNA	5.50196	8.36644	8.45016	6.49807
LNC_001503	XLOC_032605	--	intronic_lncRNA	1.12376	1.05805	6.46359	0
LNC_001508	XLOC_032684	--	intronic_lncRNA	0	0.141776	0	0.587153
LNC_001509	XLOC_032695	--	intronic_lncRNA	0.986843	0.616573	0.412297	0.303879
LNC_005580	XLOC_129826	--	intronic_lncRNA	0.654778	0.185469	0.314795	0.474226
LNC_000061	XLOC_000611	--	lincRNA	0.428063	3.26755	64.1823	43.6513
LNC_005582	XLOC_129902	--	intronic_lncRNA	0.183986	0.219857	2.40648	2.30242
LNC_005583	XLOC_129992	--	lincRNA	0.74339	0.226254	0.258391	0.09507
LNC_005584	XLOC_130014	--	intronic_lncRNA	0.525356	0.451375	0.393065	0
LNC_005585	XLOC_130015	--	intronic_lncRNA	0.213729	0.11717	0.554799	0.308344
LNC_003869	XLOC_083274	--	intronic_lncRNA	0.073997	0.786264	0.092463	0.428955
LNC_003868	XLOC_083267	--	intronic_lncRNA	0.163376	0.811363	0.384934	0.339137
LNC_003865	XLOC_083013	--	intronic_lncRNA	0.271526	0.635789	1.88162	1.59179
LNC_003864	XLOC_082943	--	lincRNA	32.8703	15.2913	18.2365	29.7991
LNC_003867	XLOC_083267	--	intronic_lncRNA	1.37601	0.375683	0.860938	0.945823
LNC_003866	XLOC_083093	--	lincRNA	0.97423	1.0091	0.561575	0.530658
LNC_003861	XLOC_082870	--	intronic_lncRNA	0.347962	0.171768	0.387637	0.535274
LNC_003860	XLOC_082870	--	intronic_lncRNA	0	0	0	0.517477
LNC_003863	XLOC_082919	--	lincRNA	0.385817	0	0.465062	0
LNC_003862	XLOC_082911	--	lincRNA	0.82741	0.319595	0	0.758171
LNC_005588	XLOC_130135	--	lincRNA	0	0	0.479299	0
LNC_000369	XLOC_006160	--	intronic_lncRNA	0.574265	0.488645	0	0
LNC_000368	XLOC_006144	--	intronic_lncRNA	1.00861	0.585008	0.101669	0.130286
LNC_000367	XLOC_006144	--	intronic_lncRNA	3.6661	7.04864	3.40578	4.10585
LNC_000366	XLOC_006141	--	intronic_lncRNA	0.198052	0.24808	0.415675	0.326941
LNC_000365	XLOC_006097	--	intronic_lncRNA	0.39189	0.53041	0.670314	0.38775
LNC_000364	XLOC_006038	--	intronic_lncRNA	1.11928	0.561624	1.14392	0.908708
LNC_000363	XLOC_006035	--	intronic_lncRNA	0.971824	0.854045	0.30265	0.482543
LNC_000362	XLOC_005973	--	intronic_lncRNA	0.378304	0.675124	0	0
LNC_000361	XLOC_005954	--	intronic_lncRNA	0.718185	0.144277	0	0
LNC_000360	XLOC_005868	--	intronic_lncRNA	0.965682	0.098504	0.669905	0.876179
LNC_002732	XLOC_063510	--	intronic_lncRNA	2.46135	3.8269	4.00181	3.57156
LNC_002733	XLOC_063521	--	intronic_lncRNA	0	0.073242	0	0.553811
LNC_002730	XLOC_063471	--	intronic_lncRNA	2.17802	2.14467	2.21011	1.75009
LNC_002731	XLOC_063509	--	intronic_lncRNA	0.512155	0	0	0
LNC_002736	XLOC_063550	--	intronic_lncRNA	0	0.788014	0	0
LNC_002737	XLOC_063552	--	intronic_lncRNA	1.13226	0.164166	0.87295	0.15996
LNC_002734	XLOC_063522	--	lincRNA	0.102789	0.207909	0.495068	0.365651
LNC_002735	XLOC_063541	--	intronic_lncRNA	1.01949	0.22171	1.15285	0.822255
LNC_002738	XLOC_063588	--	intronic_lncRNA	0.746845	0.58812	0.762172	1.27739
LNC_002739	XLOC_063614	--	intronic_lncRNA	0.724193	0.812917	1.13574	1.45272
LNC_002884	XLOC_066315	--	intronic_lncRNA	0.721671	0.961203	0.766278	1.37459
LNC_002885	XLOC_066326	--	lincRNA	3.04815	14.4006	3.04558	2.11118
LNC_002886	XLOC_066339	--	intronic_lncRNA	0.538675	0.003407	0.032662	0.130145
LNC_002887	XLOC_066407	--	intronic_lncRNA	0	0	0.64788	0
LNC_002880	XLOC_066265	--	intronic_lncRNA	0.352141	0.627906	0.27081	0.069389
LNC_002881	XLOC_066266	--	intronic_lncRNA	0.500484	0.392645	0.445225	0
LNC_002882	XLOC_066281	--	intronic_lncRNA	61.3311	62.9569	83.4729	87.728
LNC_002883	XLOC_066285	--	intronic_lncRNA	14.5941	41.7348	18.1467	20.3403
LNC_002888	XLOC_066475	--	intronic_lncRNA	0.468091	3.58451	0.255279	0.565345
LNC_002889	XLOC_066485	--	intronic_lncRNA	2.36517	4.12615	10.1994	4.08679
LNC_001283	XLOC_027834	--	intronic_lncRNA	1.03805	1.2169	0.829689	1.42849
LNC_001282	XLOC_027699	--	intronic_lncRNA	2.3508	1.67283	1.03535	2.96975
LNC_001281	XLOC_027699	--	intronic_lncRNA	3.90307	1.2153	8.29676	1.53375
LNC_001280	XLOC_027699	--	intronic_lncRNA	1.54343	4.68039	1.12998	4.17293
LNC_001287	XLOC_028223	--	lincRNA	0.918464	0.245497	0.080155	0.153179
LNC_001286	XLOC_028157	--	lincRNA	1.23548	0.636471	0.187653	0.207123
LNC_001285	XLOC_027894	--	intronic_lncRNA	0.274391	0.520014	0.281545	0.252262
LNC_001284	XLOC_027876	--	intronic_lncRNA	0	0.538595	0	0
LNC_001289	XLOC_028263	--	intronic_lncRNA	0.06315	0.094513	0.517893	0.894622
LNC_001288	XLOC_028260	--	intronic_lncRNA	18.88	11.9114	15.6397	13.3727
LNC_004079	XLOC_088278	--	intronic_lncRNA	0.503929	0	0.223029	0.675729
LNC_004078	XLOC_088274	--	intronic_lncRNA	0.40775	0	0.510557	0.095968
LNC_004073	XLOC_088129	--	intronic_lncRNA	0.46907	0.185458	0.425079	0.624759
LNC_004072	XLOC_088128	--	intronic_lncRNA	0.418889	0.313251	1.10876	0.606743
LNC_004071	XLOC_088128	--	intronic_lncRNA	0.552754	0.096388	0	0.224739
LNC_004070	XLOC_088125	--	intronic_lncRNA	0.401057	0.621421	0.401493	0.704448
LNC_004077	XLOC_088255	--	intronic_lncRNA	0.561839	0.369304	0.792346	0.364864
LNC_004076	XLOC_088255	--	intronic_lncRNA	0.107246	0.176385	0.411909	0.130817
LNC_004075	XLOC_088254	--	intronic_lncRNA	0.276381	0.197449	0.49139	0.335911
LNC_004074	XLOC_088162	--	intronic_lncRNA	0.086998	0.304107	0.396063	0.53068
LNC_000958	XLOC_020460	--	intronic_lncRNA	0.004584	0.015804	0.008183	0.403375
LNC_000959	XLOC_020492	--	intronic_lncRNA	0	0	0.451647	0
LNC_005708	XLOC_133728	--	lincRNA	1.01302	0.130338	0	0
LNC_005709	XLOC_133748	--	antisense_lncRNA	0.609587	0.578318	0.317562	0.634906
LNC_000950	XLOC_020305	--	intronic_lncRNA	0.343879	0.761474	0.635993	0.484025
LNC_000951	XLOC_020307	--	intronic_lncRNA	0.107382	0.115078	0.806465	0.237301
LNC_000952	XLOC_020311	--	intronic_lncRNA	1.07942	0.113069	0.156255	0.133144
LNC_000953	XLOC_020311	--	intronic_lncRNA	1.69507	0.421462	0.397017	0.344986
LNC_000954	XLOC_020426	--	intronic_lncRNA	0.189966	0.377817	0.337702	0.593435
LNC_000955	XLOC_020449	--	intronic_lncRNA	0.572706	0	0	0.159628
LNC_000956	XLOC_020460	--	intronic_lncRNA	0.906855	0.651611	1.07532	0.76345
LNC_000957	XLOC_020460	--	intronic_lncRNA	0.43874	0.222645	0.773756	0.266901
LNC_005852	XLOC_137819	--	intronic_lncRNA	0	0	0.500875	0.329426
LNC_005853	XLOC_137825	--	intronic_lncRNA	0.165506	0.242388	0.622944	0.16208
LNC_005850	XLOC_137723	--	intronic_lncRNA	0.709325	0.388779	0.83649	0.669554
LNC_005851	XLOC_137788	--	intronic_lncRNA	0.535528	0.684613	0.433119	0.299777
LNC_005856	XLOC_137829	--	intronic_lncRNA	0.430696	0.19054	0.065786	0.306062
LNC_005857	XLOC_137840	--	intronic_lncRNA	0.41753	0.156693	0.305856	0.41798
LNC_005854	XLOC_137826	--	intronic_lncRNA	0.286151	0.202576	0.935682	0.36659
LNC_005855	XLOC_137829	--	intronic_lncRNA	3.08512	1.58694	3.06703	3.84095
LNC_005858	XLOC_137842	--	intronic_lncRNA	0.902589	0.751013	0.547152	0.571343
LNC_005859	XLOC_137846	--	intronic_lncRNA	0.948266	0	0	0
LNC_004851	XLOC_109076	--	intronic_lncRNA	0.548393	0	0	0
LNC_004850	XLOC_108875	--	intronic_lncRNA	2.39179	0.19679	0.297435	0.34564
LNC_004325	XLOC_093910	--	intronic_lncRNA	0.585602	0.14783	0.042701	0.153777
LNC_001773	XLOC_039300	--	lincRNA	0.150189	0.250028	0.288409	0.779829
LNC_001772	XLOC_039036	--	intronic_lncRNA	0.434287	0.504342	0.672234	0
LNC_001771	XLOC_038950	--	intronic_lncRNA	0.422699	0.686704	0.552915	0.144589
LNC_001770	XLOC_038944	--	intronic_lncRNA	1.4746	1.71486	1.23731	1.20285
LNC_001777	XLOC_039449	--	intronic_lncRNA	2.72946	0.934559	1.19202	1.67255
LNC_001776	XLOC_039333	--	intronic_lncRNA	1.13364	0.521014	0.841747	0.874314
LNC_001775	XLOC_039318	--	intronic_lncRNA	0.436561	0.278956	0.571427	1.34072
LNC_001774	XLOC_039317	--	intronic_lncRNA	0.494034	0.172078	0.306941	0.134591
LNC_004323	XLOC_093833	--	intronic_lncRNA	0.755613	0.945454	0.859103	0.037141
LNC_001779	XLOC_039462	--	intronic_lncRNA	0.537673	0.400823	0.814483	1.40443
LNC_001778	XLOC_039451	--	intronic_lncRNA	0.666853	0.276273	0.607072	0.8287
LNC_004854	XLOC_109132	--	intronic_lncRNA	0.144109	0.1424	0.284241	0.652827
LNC_004321	XLOC_093818	--	lincRNA	0.162943	0.066348	0.672466	0.480945
LNC_004320	XLOC_093816	--	intronic_lncRNA	0.013868	0.590206	1.32967	0.027231
LNC_004815	XLOC_107546	--	intronic_lncRNA	0.463485	0.671308	0.464549	0.518715
LNC_004814	XLOC_107438	--	intronic_lncRNA	0.266526	0.3839	0.610627	0.943257
LNC_004817	XLOC_107706	--	lincRNA	0.125879	0	0	0.434909
LNC_004816	XLOC_107566	--	intronic_lncRNA	0.325638	0.563856	0.413418	0.184184
LNC_004811	XLOC_107397	--	intronic_lncRNA	0.512159	0.327084	0.484598	0.774635
LNC_004810	XLOC_107396	--	intronic_lncRNA	0.240927	0.178121	0.424772	0.592596
LNC_004813	XLOC_107438	--	intronic_lncRNA	0.066555	0.041577	0.265617	0.819751
LNC_004812	XLOC_107422	--	lincRNA	0.498206	0.216528	0.326946	0.413772
LNC_004819	XLOC_107729	--	intronic_lncRNA	0.228783	0.284159	0.601341	0.215175
LNC_004818	XLOC_107725	--	intronic_lncRNA	0.56565	0.115515	0.295964	0.312962
LNC_001360	XLOC_029894	--	lincRNA	1.34308	0.367263	0.022991	0.074573
LNC_001361	XLOC_029973	--	intronic_lncRNA	0.508102	0	0	0
LNC_001362	XLOC_029984	--	intronic_lncRNA	0.267288	0.441374	0.059608	0.496848
LNC_001363	XLOC_029985	--	intronic_lncRNA	0.402284	0.680844	0.09545	0.246507
LNC_001364	XLOC_030044	--	intronic_lncRNA	0.694126	0.30646	0.16627	0.124681
LNC_001365	XLOC_030056	--	intronic_lncRNA	3.11434	2.67991	3.7101	3.85884
LNC_001366	XLOC_030067	--	intronic_lncRNA	0.454461	0.167651	0.469066	0.447869
LNC_001367	XLOC_030069	--	intronic_lncRNA	0.817464	0.424093	0.281446	0.143175
LNC_001368	XLOC_030100	--	intronic_lncRNA	0.671527	0.173132	0.273959	0.055439
LNC_001369	XLOC_030101	--	intronic_lncRNA	0.560656	0.584832	0.20204	0.388841
LNC_003638	XLOC_077827	--	intronic_lncRNA	0.39056	0.777103	0.505632	0.219666
LNC_003639	XLOC_077828	--	intronic_lncRNA	0.79906	0	0.053866	0.215427
LNC_003630	XLOC_077489	--	intronic_lncRNA	1.69276	1.51952	2.68386	2.4779
LNC_003631	XLOC_077501	--	lincRNA	0.905679	0.386899	0.887123	0.458265
LNC_003632	XLOC_077505	--	intronic_lncRNA	0.606668	0.284396	0.964281	0.760227
LNC_003633	XLOC_077623	--	intronic_lncRNA	1.64558	1.52025	1.85673	1.66147
LNC_003634	XLOC_077822	--	intronic_lncRNA	0.428678	0.233252	0.507223	0.808584
LNC_003635	XLOC_077822	--	intronic_lncRNA	0.342517	0.275032	0.331597	0.399185
LNC_003636	XLOC_077823	--	antisense_lncRNA	0.457991	0	0.226949	0.294903
LNC_003637	XLOC_077826	--	intronic_lncRNA	0.514921	0.617014	0.289823	0.968241
LNC_005289	XLOC_121195	--	intronic_lncRNA	0.568969	0.234646	0.22349	0.873888
LNC_005288	XLOC_121134	--	intronic_lncRNA	0.818757	0.619998	0.39896	0.610268
LNC_005287	XLOC_121114	--	intronic_lncRNA	0	0.03151	0.188837	0.820628
LNC_005286	XLOC_121113	--	intronic_lncRNA	0.584704	0.796155	0.92369	0.431086
LNC_005285	XLOC_121109	--	lincRNA	1.93856	0.753645	1.11069	1.32018
LNC_005284	XLOC_121027	--	intronic_lncRNA	0	0	0.664483	0.270365
LNC_005283	XLOC_121027	--	intronic_lncRNA	0.124286	0	0.20534	0.762488
LNC_005282	XLOC_121019	--	intronic_lncRNA	0.362176	0.223217	0.50165	0.469533
LNC_005281	XLOC_120949	--	lincRNA	0.386672	0.142361	0.541923	0
LNC_005280	XLOC_120925	--	antisense_lncRNA	0	0	0.414757	0.082124
LNC_002949	XLOC_067564	--	lincRNA	0.641777	0.494468	0.19807	0.100599
LNC_002948	XLOC_067551	--	intronic_lncRNA	1.54284	0.797371	1.50099	1.3157
LNC_002941	XLOC_067470	--	intronic_lncRNA	0.789741	0.302299	0.483235	0.569251
LNC_002940	XLOC_067425	--	intronic_lncRNA	1.40489	0.224913	0.724325	0.78213
LNC_002943	XLOC_067543	--	intronic_lncRNA	0.505152	0.403062	0.867969	0.661124
LNC_002942	XLOC_067541	--	lincRNA	0	0	0.104764	0.517976
LNC_002945	XLOC_067546	--	intronic_lncRNA	1.19349	0.157725	0.022424	0.444884
LNC_002944	XLOC_067543	--	intronic_lncRNA	0	0.184316	0.469955	0.806639
LNC_002947	XLOC_067548	--	intronic_lncRNA	1.02026	0.567337	0.406883	0.347544
LNC_002946	XLOC_067547	--	intronic_lncRNA	0	0.527267	0.133797	0
LNC_001948	XLOC_043955	--	intronic_lncRNA	0	0.075988	0.192696	0.845395
LNC_001949	XLOC_043956	--	intronic_lncRNA	0.216632	0.116894	0.540316	0.638913
LNC_001944	XLOC_043708	--	intronic_lncRNA	0.796191	0	0.166565	0.078654
LNC_001945	XLOC_043712	--	intronic_lncRNA	0.178882	0.256033	0.599335	0.447698
LNC_001946	XLOC_043716	--	intronic_lncRNA	1.61721	1.69157	0.964985	1.21298
LNC_001947	XLOC_043812	--	lincRNA	0.713409	0.900433	0.67051	0.291741
LNC_001940	XLOC_043667	--	intronic_lncRNA	1.11622	1.00502	0.496606	0.929354
LNC_001941	XLOC_043668	--	lincRNA	0	0	0.413844	0
LNC_001942	XLOC_043682	--	lincRNA	0.649141	0	0.288325	0.463231
LNC_001943	XLOC_043708	--	intronic_lncRNA	0	0.35311	0	0.302859
LNC_000011	XLOC_000222	--	lincRNA	0.374397	1.37109	0.181576	0.744208
LNC_000010	XLOC_000222	--	lincRNA	0.804314	0.101971	0	0.237263
LNC_000013	XLOC_000258	--	lincRNA	0.418952	1.13734	0.169266	0.326627
LNC_000012	XLOC_000249	--	lincRNA	0	0	0.836798	0
LNC_000015	XLOC_000288	--	lincRNA	15.7658	6.24247	5.41766	3.17835
LNC_000014	XLOC_000288	--	lincRNA	42.6949	31.5212	28.5929	18.0931
LNC_000017	XLOC_000289	--	lincRNA	65.1523	0.122756	0.104774	0.058762
LNC_000016	XLOC_000289	--	lincRNA	22.5405	0	0	0
LNC_000019	XLOC_000289	--	lincRNA	6.0671	14.2175	3.87772	2.44574
LNC_000018	XLOC_000289	--	lincRNA	19.2615	0.245645	36.6012	18.0108
LNC_000239	XLOC_003335	--	intronic_lncRNA	1.2388	0.457821	0.575972	0.562013
LNC_000238	XLOC_003261	--	antisense_lncRNA	0.972527	0.488113	0.394085	0.329584
LNC_000235	XLOC_003256	--	intronic_lncRNA	0.489856	0	0	0
LNC_000234	XLOC_003253	--	intronic_lncRNA	0.130944	0.124119	0.348455	0.155765
LNC_000237	XLOC_003260	--	intronic_lncRNA	1.19131	0.06561	0.076514	0
LNC_000236	XLOC_003259	--	intronic_lncRNA	0.901314	0.057086	0	0
LNC_000231	XLOC_003211	--	intronic_lncRNA	2.76636	1.00814	2.31888	2.71289
LNC_000230	XLOC_003202	--	intronic_lncRNA	0.499915	0.217497	0.251263	0.588876
LNC_004626	XLOC_102945	--	intronic_lncRNA	0.428244	0.503337	0.696577	0.796453
LNC_004627	XLOC_102956	--	lincRNA	0.592086	0.361088	0	0
LNC_004624	XLOC_102840	--	intronic_lncRNA	0.311857	0.366266	0.530271	0.542858
LNC_004625	XLOC_102867	--	intronic_lncRNA	0	0.197277	0.153783	0.625111
LNC_004622	XLOC_102827	--	intronic_lncRNA	0.214164	0.273531	0.735009	0.134283
LNC_004623	XLOC_102833	--	intronic_lncRNA	0.104264	0	0.447345	0
LNC_004620	XLOC_102797	--	lincRNA	0	0	0	0.50498
LNC_004621	XLOC_102815	--	intronic_lncRNA	0.500928	0.411561	0.533468	0.799875
LNC_000232	XLOC_003246	--	intronic_lncRNA	0	0.615103	0.498516	0.306811
LNC_004628	XLOC_102963	--	lincRNA	0.6184	0	0	0
LNC_004629	XLOC_102991	--	intronic_lncRNA	0.290228	0.128887	0.05219	0.417101
LNC_001568	XLOC_034095	--	intronic_lncRNA	0.196103	0.267752	0.033183	0.543685
LNC_001569	XLOC_034096	--	intronic_lncRNA	0.48401	0	0.578008	0.337222
LNC_001566	XLOC_034046	--	intronic_lncRNA	0.567127	0	0	0
LNC_001567	XLOC_034095	--	intronic_lncRNA	0.730488	0.552692	0.254239	0.195674
LNC_001564	XLOC_034039	--	intronic_lncRNA	1.02832	0.134459	1.27825	0.572447
LNC_001565	XLOC_034046	--	intronic_lncRNA	0.463214	1.09369	1.23195	0.853618
LNC_001562	XLOC_034025	--	intronic_lncRNA	0.570671	0.88984	0.57182	0.258411
LNC_001563	XLOC_034031	--	intronic_lncRNA	0.484414	0	0.097857	0.267429
LNC_001560	XLOC_034021	--	intronic_lncRNA	3.82144	0.833348	0.844859	0.271412
LNC_001561	XLOC_034025	--	intronic_lncRNA	0.707224	0.073551	0.007508	0.015254
LNC_000805	XLOC_017053	--	intronic_lncRNA	0.355598	0.529657	0.423072	0.397711
[truncated: 4,488 more rows]
