# Supplementary material for: Identification of Novel Multi-Omics Expression Landscapes and Meta-Analysis of Landscape-Based Competitive Endogenous RNA Networks in ALDH+ Lung Adenocarcinoma Stem Cells
Source: Preprints.org preprint supplement (doi:10.20944/preprints202201.0286.v1), 2022-01-20
Supplement: Supplementary file 3 [file Table_S3_Novel_miRNA.xlsx]

## Sheet: Sheet1
sRNA.readcount	LSC1-m.readcount	LSC2-m.readcount	LTC1-m.readcount	LTC2-m.readcount	LSC1-m.tpm	LSC2-m.tpm	LTC1-m.tpm	LTC2-m.tpm
novel_142	0	96	0	0	0	24.942	0	0
novel_180	0	2	0	0	0	0.519626	0	0
novel_189	39	76	6	3	7.18969	19.7458	0.617135	0.301104
novel_190	52	23	18	20	9.58626	5.97569	1.85141	2.00736
novel_192	67	38	3	3	12.3515	9.87289	0.308568	0.301104
novel_217	0	9	1	3	0	2.33832	0.102856	0.301104
novel_225	0	1	0	0	0	0.259813	0	0
novel_234	8	3	7	11	1.47481	0.779438	0.719991	1.10405
novel_245	1	1	5	7	0.184351	0.259813	0.514279	0.702576
novel_248	4	5	2	3	0.737404	1.29906	0.205712	0.301104
novel_249	2	2	4	6	0.368702	0.519626	0.411423	0.602208
novel_262	0	0	0	1	0	0	0	0.100368
novel_275	4	4	3	1	0.737404	1.03925	0.308568	0.100368
novel_276	8	0	0	0	1.47481	0	0	0
novel_294	0	0	5	0	0	0	0.514279	0
novel_295	0	0	0	1	0	0	0	0.100368
novel_304	0	1	0	0	0	0.259813	0	0
novel_312	0	0	1	0	0	0	0.102856	0
novel_326	0	0	0	1	0	0	0	0.100368
novel_342	2	0	1	0	0.368702	0	0.102856	0
novel_343	0	3	0	0	0	0.779438	0	0
novel_346	0	0	0	3	0	0	0	0.301104
novel_352	0	0	0	3	0	0	0	0.301104
novel_355	0	4	7	1	0	1.03925	0.719991	0.100368
novel_361	0	11	0	0	0	2.85794	0	0
novel_383	116	11	33	29	21.3847	2.85794	3.39424	2.91067
novel_384	812	155	123	139	149.693	40.271	12.6513	13.9511
novel_405	0	1	0	0	0	0.259813	0	0
novel_417	0	1	0	0	0	0.259813	0	0
novel_423	2	4	4	1	0.368702	1.03925	0.411423	0.100368
novel_446	0	0	6	0	0	0	0.617135	0
novel_452	1	0	2	3	0.184351	0	0.205712	0.301104
novel_455	0	0	2	0	0	0	0.205712	0
novel_468	0	5	8	0	0	1.29906	0.822847	0
novel_475	0	4	0	0	0	1.03925	0	0
novel_482	6	6	13	8	1.10611	1.55888	1.33713	0.802944
novel_488	5	0	1	0	0.921755	0	0.102856	0
novel_490	7	0	0	0	1.29046	0	0	0
novel_491	0	0	0	5	0	0	0	0.50184
novel_494	5	0	6	4	0.921755	0	0.617135	0.401472
novel_498	2	14	0	0	0.368702	3.63738	0	0
novel_502	5	6	7	3	0.921755	1.55888	0.719991	0.301104
novel_503	4	1	4	7	0.737404	0.259813	0.411423	0.702576
novel_508	0	13	0	0	0	3.37757	0	0
novel_510	0	1	0	1	0	0.259813	0	0.100368
novel_519	4	7	0	2	0.737404	1.81869	0	0.200736
novel_527	0	8	0	0	0	2.0785	0	0
novel_532	3	17	2	5	0.553053	4.41682	0.205712	0.50184
novel_560	39	46	9	16	7.18969	11.9514	0.925703	1.60589
novel_565	0	1	0	0	0	0.259813	0	0
novel_566	11	1	5	5	2.02786	0.259813	0.514279	0.50184
novel_567	3	0	0	2	0.553053	0	0	0.200736
novel_601	0	0	1	2	0	0	0.102856	0.200736
novel_602	8	0	2	0	1.47481	0	0.205712	0
novel_606	0	7	0	1	0	1.81869	0	0.100368
novel_621	2	0	4	1	0.368702	0	0.411423	0.100368
novel_626	0	9	0	0	0	2.33832	0	0
novel_633	43	11	6	7	7.9271	2.85794	0.617135	0.702576
novel_641	12	1	1	0	2.21221	0.259813	0.102856	0
novel_652	12	0	0	0	2.21221	0	0	0
novel_653	0	1	1	3	0	0.259813	0.102856	0.301104
novel_658	0	0	0	6	0	0	0	0.602208
novel_66	7	4	0	0	1.29046	1.03925	0	0
novel_661	10	2	0	0	1.84351	0.519626	0	0
novel_668	0	2	0	0	0	0.519626	0	0
novel_671	0	1	2	1	0	0.259813	0.205712	0.100368
novel_677	0	0	1	2	0	0	0.102856	0.200736
novel_680	6	0	0	0	1.10611	0	0	0
novel_684	23	10	28	22	4.24008	2.59813	2.87996	2.2081
novel_696	0	1	4	6	0	0.259813	0.411423	0.602208
novel_697	11	0	0	0	2.02786	0	0	0
novel_698	2	0	4	5	0.368702	0	0.411423	0.50184
novel_701	5	0	0	0	0.921755	0	0	0
novel_710	0	4	0	0	0	1.03925	0	0
novel_714	6	0	1	0	1.10611	0	0.102856	0
novel_735	6	2	0	0	1.10611	0.519626	0	0
novel_740	4	0	0	0	0.737404	0	0	0
novel_741	0	0	1	0	0	0	0.102856	0
novel_748	14	5	3	3	2.58092	1.29906	0.308568	0.301104
novel_749	0	0	2	7	0	0	0.205712	0.702576
novel_762	11	12	7	6	2.02786	3.11775	0.719991	0.602208
novel_765	0	7	0	0	0	1.81869	0	0
novel_766	0	10	0	3	0	2.59813	0	0.301104
novel_773	1	0	0	0	0.184351	0	0	0
novel_778	9	4	0	0	1.65916	1.03925	0	0
novel_795	0	4	0	0	0	1.03925	0	0
novel_796	3	0	0	0	0.553053	0	0	0
novel_797	0	0	6	1	0	0	0.617135	0.100368
novel_799	0	0	4	0	0	0	0.411423	0
novel_805	0	3	0	2	0	0.779438	0	0.200736
novel_808	0	3	0	0	0	0.779438	0	0
novel_811	4	2	0	0	0.737404	0.519626	0	0
novel_819	0	0	0	5	0	0	0	0.50184
novel_823	0	0	7	0	0	0	0.719991	0
novel_828	2	0	0	0	0.368702	0	0	0
novel_833	5	0	0	0	0.921755	0	0	0
novel_834	1	3	0	0	0.184351	0.779438	0	0
novel_842	5	0	0	0	0.921755	0	0	0
novel_848	1	0	2	2	0.184351	0	0.205712	0.200736
novel_92	426	945	631	698	78.5336	245.523	64.902	70.0568
