# Supplementary material for: Identification of Novel Multi-Omics Expression Landscapes and Meta-Analysis of Landscape-Based Competitive Endogenous RNA Networks in ALDH+ Lung Adenocarcinoma Stem Cells
Source: Preprints.org preprint supplement (doi:10.20944/preprints202201.0286.v1), 2022-01-20
Supplement: Supplementary file 4 [file Table_S4_Novel_circRNA.xlsx]

## Sheet: Sheet1
circRNA.readcount	LTC1.readcount	LTC2.readcount	LSC1.readcount	LSC2.readcount	LTC1.tpm	LTC2.tpm	LSC1.tpm	LSC2.tpm
hsa_circ_0000014	0	7	2	11	0	1204.4	421.941	2553.98
hsa_circ_0000033	4	2	4	4	693.963	344.116	843.882	928.721
hsa_circ_0000069	12	6	10	2	2081.89	1032.35	2109.7	464.36
hsa_circ_0000091	3	11	6	6	520.472	1892.64	1265.82	1393.08
hsa_circ_0000095	10	6	0	2	1734.91	1032.35	0	464.36
hsa_circ_0000098	3	3	0	0	520.472	516.173	0	0
hsa_circ_0000117	2	2	2	6	346.981	344.116	421.941	1393.08
hsa_circ_0000118	12	19	14	37	2081.89	3269.1	2953.59	8590.67
hsa_circ_0000119	6	12	5	10	1040.94	2064.69	1054.85	2321.8
hsa_circ_0000153	6	4	3	0	1040.94	688.231	632.911	0
hsa_circ_0000160	5	3	9	0	867.453	516.173	1898.73	0
hsa_circ_0000175	6	15	7	17	1040.94	2580.87	1476.79	3947.06
hsa_circ_0000195	2	3	4	0	346.981	516.173	843.882	0
hsa_circ_0000198	4	3	0	0	693.963	516.173	0	0
hsa_circ_0000211	4	4	3	0	693.963	688.231	632.911	0
hsa_circ_0000219	9	8	7	2	1561.42	1376.46	1476.79	464.36
hsa_circ_0000231	98	87	64	26	17002.1	14969	13502.1	6036.68
hsa_circ_0000264	11	0	3	10	1908.4	0	632.911	2321.8
hsa_circ_0000277	11	14	8	7	1908.4	2408.81	1687.76	1625.26
hsa_circ_0000280	3	7	5	2	520.472	1204.4	1054.85	464.36
hsa_circ_0000296	2	5	0	0	346.981	860.289	0	0
hsa_circ_0000337	2	2	0	2	346.981	344.116	0	464.36
hsa_circ_0000344	4	3	2	3	693.963	516.173	421.941	696.541
hsa_circ_0000347	0	0	2	3	0	0	421.941	696.541
hsa_circ_0000378	3	2	0	0	520.472	344.116	0	0
hsa_circ_0000386	0	2	5	4	0	344.116	1054.85	928.721
hsa_circ_0000396	7	8	7	11	1214.43	1376.46	1476.79	2553.98
hsa_circ_0000397	8	13	5	20	1387.93	2236.75	1054.85	4643.6
hsa_circ_0000398	3	3	0	0	520.472	516.173	0	0
hsa_circ_0000399	2	4	4	0	346.981	688.231	843.882	0
hsa_circ_0000417	4	6	0	8	693.963	1032.35	0	1857.44
hsa_circ_0000418	0	5	4	7	0	860.289	843.882	1625.26
hsa_circ_0000437	3	4	0	8	520.472	688.231	0	1857.44
hsa_circ_0000439	0	0	4	2	0	0	843.882	464.36
hsa_circ_0000443	6	3	4	3	1040.94	516.173	843.882	696.541
hsa_circ_0000448	11	7	7	9	1908.4	1204.4	1476.79	2089.62
hsa_circ_0000467	5	0	6	3	867.453	0	1265.82	696.541
hsa_circ_0000471	10	4	6	14	1734.91	688.231	1265.82	3250.52
hsa_circ_0000478	12	13	10	9	2081.89	2236.75	2109.7	2089.62
hsa_circ_0000489	10	10	4	0	1734.91	1720.58	843.882	0
hsa_circ_0000504	2	4	0	0	346.981	688.231	0	0
hsa_circ_0000523	3	4	0	5	520.472	688.231	0	1160.9
hsa_circ_0000544	8	10	6	3	1387.93	1720.58	1265.82	696.541
hsa_circ_0000545	4	0	3	3	693.963	0	632.911	696.541
hsa_circ_0000566	5	5	9	11	867.453	860.289	1898.73	2553.98
hsa_circ_0000567	31	17	8	12	5378.21	2924.98	1687.76	2786.16
hsa_circ_0000571	0	0	2	2	0	0	421.941	464.36
hsa_circ_0000586	15	22	16	13	2602.36	3785.27	3375.53	3018.34
hsa_circ_0000592	6	3	9	4	1040.94	516.173	1898.73	928.721
hsa_circ_0000607	43	19	29	20	7460.1	3269.1	6118.14	4643.6
hsa_circ_0000609	3	3	13	0	520.472	516.173	2742.62	0
hsa_circ_0000620	11	9	3	0	1908.4	1548.52	632.911	0
hsa_circ_0000629	4	4	0	0	693.963	688.231	0	0
hsa_circ_0000638	7	13	8	7	1214.43	2236.75	1687.76	1625.26
hsa_circ_0000642	5	0	6	5	867.453	0	1265.82	1160.9
hsa_circ_0000643	4	9	7	12	693.963	1548.52	1476.79	2786.16
hsa_circ_0000647	2	4	0	0	346.981	688.231	0	0
hsa_circ_0000672	3	5	3	4	520.472	860.289	632.911	928.721
hsa_circ_0000698	24	15	16	4	4163.78	2580.87	3375.53	928.721
hsa_circ_0000711	10	19	17	19	1734.91	3269.1	3586.5	4411.42
hsa_circ_0000780	3	0	3	2	520.472	0	632.911	464.36
hsa_circ_0000799	8	10	11	14	1387.93	1720.58	2320.68	3250.52
hsa_circ_0000817	5	5	2	0	867.453	860.289	421.941	0
hsa_circ_0000818	8	2	4	5	1387.93	344.116	843.882	1160.9
hsa_circ_0000826	9	7	3	5	1561.42	1204.4	632.911	1160.9
hsa_circ_0000831	6	13	6	11	1040.94	2236.75	1265.82	2553.98
hsa_circ_0000835	36	28	30	12	6245.66	4817.62	6329.11	2786.16
hsa_circ_0000836	14	8	14	9	2428.87	1376.46	2953.59	2089.62
hsa_circ_0000839	8	5	10	6	1387.93	860.289	2109.7	1393.08
hsa_circ_0000842	3	0	3	2	520.472	0	632.911	464.36
hsa_circ_0000847	23	15	10	9	3990.28	2580.87	2109.7	2089.62
hsa_circ_0000849	2	3	0	2	346.981	516.173	0	464.36
hsa_circ_0000854	0	2	2	4	0	344.116	421.941	928.721
hsa_circ_0000894	3	2	0	0	520.472	344.116	0	0
hsa_circ_0000943	0	7	3	3	0	1204.4	632.911	696.541
hsa_circ_0000987	0	11	5	2	0	1892.64	1054.85	464.36
hsa_circ_0000997	7	5	6	8	1214.43	860.289	1265.82	1857.44
hsa_circ_0001006	24	23	24	15	4163.78	3957.33	5063.29	3482.7
hsa_circ_0001009	7	6	9	8	1214.43	1032.35	1898.73	1857.44
hsa_circ_0001016	3	0	4	8	520.472	0	843.882	1857.44
hsa_circ_0001017	39	30	25	27	6766.13	5161.73	5274.26	6268.86
hsa_circ_0001020	5	0	3	2	867.453	0	632.911	464.36
hsa_circ_0001023	9	10	6	6	1561.42	1720.58	1265.82	1393.08
hsa_circ_0001051	0	0	2	3	0	0	421.941	696.541
hsa_circ_0001061	0	3	2	2	0	516.173	421.941	464.36
hsa_circ_0001064	5	3	3	4	867.453	516.173	632.911	928.721
hsa_circ_0001068	2	2	5	2	346.981	344.116	1054.85	464.36
hsa_circ_0001074	2	0	3	2	346.981	0	632.911	464.36
hsa_circ_0001081	2	3	0	0	346.981	516.173	0	0
hsa_circ_0001083	23	18	16	13	3990.28	3097.04	3375.53	3018.34
hsa_circ_0001085	5	16	16	8	867.453	2752.92	3375.53	1857.44
hsa_circ_0001098	6	12	0	0	1040.94	2064.69	0	0
hsa_circ_0001103	17	11	10	0	2949.34	1892.64	2109.7	0
hsa_circ_0001112	18	16	6	9	3122.83	2752.92	1265.82	2089.62
hsa_circ_0001116	0	5	8	3	0	860.289	1687.76	696.541
hsa_circ_0001118	14	6	25	6	2428.87	1032.35	5274.26	1393.08
hsa_circ_0001130	20	10	11	3	3469.81	1720.58	2320.68	696.541
hsa_circ_0001165	3	3	0	0	520.472	516.173	0	0
hsa_circ_0001181	12	12	18	7	2081.89	2064.69	3797.47	1625.26
hsa_circ_0001189	3	6	2	5	520.472	1032.35	421.941	1160.9
hsa_circ_0001246	11	3	2	0	1908.4	516.173	421.941	0
hsa_circ_0001247	20	18	15	8	3469.81	3097.04	3164.56	1857.44
hsa_circ_0001258	10	4	4	6	1734.91	688.231	843.882	1393.08
hsa_circ_0001278	9	13	5	6	1561.42	2236.75	1054.85	1393.08
hsa_circ_0001313	3	3	2	7	520.472	516.173	421.941	1625.26
hsa_circ_0001315	7	7	0	0	1214.43	1204.4	0	0
hsa_circ_0001345	12	7	6	4	2081.89	1204.4	1265.82	928.721
hsa_circ_0001346	43	34	39	21	7460.1	5849.97	8227.85	4875.78
hsa_circ_0001355	2	7	0	5	346.981	1204.4	0	1160.9
hsa_circ_0001358	0	0	3	4	0	0	632.911	928.721
hsa_circ_0001380	2	6	6	2	346.981	1032.35	1265.82	464.36
hsa_circ_0001383	2	4	0	3	346.981	688.231	0	696.541
hsa_circ_0001386	14	8	6	4	2428.87	1376.46	1265.82	928.721
hsa_circ_0001402	3	4	0	0	520.472	688.231	0	0
hsa_circ_0001414	2	6	0	5	346.981	1032.35	0	1160.9
hsa_circ_0001417	0	0	4	7	0	0	843.882	1625.26
hsa_circ_0001434	11	8	4	2	1908.4	1376.46	843.882	464.36
hsa_circ_0001439	10	11	6	5	1734.91	1892.64	1265.82	1160.9
hsa_circ_0001451	12	16	12	19	2081.89	2752.92	2531.65	4411.42
hsa_circ_0001460	10	10	0	8	1734.91	1720.58	0	1857.44
hsa_circ_0001467	0	0	3	3	0	0	632.911	696.541
hsa_circ_0001472	4	5	2	4	693.963	860.289	421.941	928.721
hsa_circ_0001478	2	2	2	0	346.981	344.116	421.941	0
hsa_circ_0001481	18	30	7	3	3122.83	5161.73	1476.79	696.541
hsa_circ_0001487	4	9	2	0	693.963	1548.52	421.941	0
hsa_circ_0001492	13	9	12	3	2255.38	1548.52	2531.65	696.541
hsa_circ_0001495	5	11	10	5	867.453	1892.64	2109.7	1160.9
hsa_circ_0001518	17	12	8	5	2949.34	2064.69	1687.76	1160.9
hsa_circ_0001519	16	11	11	0	2775.85	1892.64	2320.68	0
hsa_circ_0001522	28	23	14	19	4857.74	3957.33	2953.59	4411.42
hsa_circ_0001535	36	44	22	43	6245.66	7570.54	4641.35	9983.75
hsa_circ_0001550	65	61	46	31	11276.9	10495.5	9704.64	7197.59
hsa_circ_0001551	6	4	2	8	1040.94	688.231	421.941	1857.44
hsa_circ_0001554	13	6	5	0	2255.38	1032.35	1054.85	0
hsa_circ_0001558	22	26	20	8	3816.79	4473.5	4219.41	1857.44
hsa_circ_0001564	0	8	5	3	0	1376.46	1054.85	696.541
hsa_circ_0001566	27	37	28	8	4684.25	6366.14	5907.17	1857.44
hsa_circ_0001573	21	11	24	12	3643.3	1892.64	5063.29	2786.16
hsa_circ_0001575	0	0	4	5	0	0	843.882	1160.9
hsa_circ_0001613	8	5	6	5	1387.93	860.289	1265.82	1160.9
hsa_circ_0001615	2	5	0	2	346.981	860.289	0	464.36
hsa_circ_0001632	8	2	3	0	1387.93	344.116	632.911	0
hsa_circ_0001649	3	2	0	6	520.472	344.116	0	1393.08
hsa_circ_0001661	6	2	5	6	1040.94	344.116	1054.85	1393.08
hsa_circ_0001663	3	4	7	7	520.472	688.231	1476.79	1625.26
hsa_circ_0001667	6	3	5	2	1040.94	516.173	1054.85	464.36
hsa_circ_0001685	10	8	6	5	1734.91	1376.46	1265.82	1160.9
hsa_circ_0001686	18	16	23	10	3122.83	2752.92	4852.32	2321.8
hsa_circ_0001687	6	2	0	4	1040.94	344.116	0	928.721
hsa_circ_0001696	3	4	2	0	520.472	688.231	421.941	0
hsa_circ_0001699	10	5	7	9	1734.91	860.289	1476.79	2089.62
hsa_circ_0001700	2	4	4	2	346.981	688.231	843.882	464.36
hsa_circ_0001725	9	9	11	12	1561.42	1548.52	2320.68	2786.16
hsa_circ_0001727	12	23	17	14	2081.89	3957.33	3586.5	3250.52
hsa_circ_0001741	15	11	7	7	2602.36	1892.64	1476.79	1625.26
hsa_circ_0001746	12	0	6	8	2081.89	0	1265.82	1857.44
hsa_circ_0001747	5	2	2	3	867.453	344.116	421.941	696.541
hsa_circ_0001750	4	4	5	2	693.963	688.231	1054.85	464.36
hsa_circ_0001769	2	9	4	3	346.981	1548.52	843.882	696.541
hsa_circ_0001772	20	11	14	11	3469.81	1892.64	2953.59	2553.98
hsa_circ_0001776	2	4	0	0	346.981	688.231	0	0
hsa_circ_0001777	11	9	3	5	1908.4	1548.52	632.911	1160.9
hsa_circ_0001788	6	3	3	0	1040.94	516.173	632.911	0
hsa_circ_0001798	0	2	3	8	0	344.116	632.911	1857.44
hsa_circ_0001811	0	0	2	2	0	0	421.941	464.36
hsa_circ_0001821	17	14	14	11	2949.34	2408.81	2953.59	2553.98
hsa_circ_0001847	18	7	13	7	3122.83	1204.4	2742.62	1625.26
hsa_circ_0001861	0	9	2	4	0	1548.52	421.941	928.721
hsa_circ_0001865	3	2	0	0	520.472	344.116	0	0
hsa_circ_0001868	3	15	4	4	520.472	2580.87	843.882	928.721
hsa_circ_0001869	0	3	7	3	0	516.173	1476.79	696.541
hsa_circ_0001875	20	15	15	9	3469.81	2580.87	3164.56	2089.62
hsa_circ_0001882	8	13	4	12	1387.93	2236.75	843.882	2786.16
hsa_circ_0001900	108	117	67	23	18737	20130.8	14135	5340.14
hsa_circ_0001906	4	3	0	0	693.963	516.173	0	0
hsa_circ_0001922	3	6	3	0	520.472	1032.35	632.911	0
hsa_circ_0001944	17	20	31	20	2949.34	3441.16	6540.08	4643.6
hsa_circ_0001946	418	446	655	922	72519.1	76737.8	138186	214070
hsa_circ_0001958	4	10	3	6	693.963	1720.58	632.911	1393.08
hsa_circ_0001977	9	4	4	3	1561.42	688.231	843.882	696.541
hsa_circ_0002024	16	17	14	0	2775.85	2924.98	2953.59	0
hsa_circ_0002058	3	5	3	5	520.472	860.289	632.911	1160.9
hsa_circ_0002059	2	5	6	4	346.981	860.289	1265.82	928.721
hsa_circ_0002076	36	29	42	14	6245.66	4989.68	8860.76	3250.52
hsa_circ_0002085	5	6	9	0	867.453	1032.35	1898.73	0
hsa_circ_0002111	42	68	25	20	7286.61	11699.9	5274.26	4643.6
hsa_circ_0002138	9	12	3	3	1561.42	2064.69	632.911	696.541
hsa_circ_0002141	2	10	6	0	346.981	1720.58	1265.82	0
hsa_circ_0002158	9	2	3	0	1561.42	344.116	632.911	0
hsa_circ_0002172	3	4	3	3	520.472	688.231	632.911	696.541
hsa_circ_0002220	6	4	4	2	1040.94	688.231	843.882	464.36
hsa_circ_0002274	4	4	0	4	693.963	688.231	0	928.721
hsa_circ_0002301	0	3	6	3	0	516.173	1265.82	696.541
hsa_circ_0002317	4	2	4	0	693.963	344.116	843.882	0
hsa_circ_0002346	3	11	0	2	520.472	1892.64	0	464.36
hsa_circ_0002348	6	11	0	0	1040.94	1892.64	0	0
hsa_circ_0002374	10	3	4	3	1734.91	516.173	843.882	696.541
hsa_circ_0002392	2	2	2	0	346.981	344.116	421.941	0
hsa_circ_0002398	7	7	2	2	1214.43	1204.4	421.941	464.36
hsa_circ_0002431	2	2	2	0	346.981	344.116	421.941	0
hsa_circ_0002457	3	6	3	9	520.472	1032.35	632.911	2089.62
hsa_circ_0002465	6	6	5	6	1040.94	1032.35	1054.85	1393.08
hsa_circ_0002483	3	8	5	0	520.472	1376.46	1054.85	0
hsa_circ_0002490	0	0	2	3	0	0	421.941	696.541
hsa_circ_0002544	0	5	2	8	0	860.289	421.941	1857.44
hsa_circ_0002556	4	8	5	0	693.963	1376.46	1054.85	0
hsa_circ_0002564	5	5	0	8	867.453	860.289	0	1857.44
hsa_circ_0002603	2	2	0	0	346.981	344.116	0	0
hsa_circ_0002607	8	3	0	4	1387.93	516.173	0	928.721
hsa_circ_0002665	5	0	5	5	867.453	0	1054.85	1160.9
hsa_circ_0002669	6	3	4	3	1040.94	516.173	843.882	696.541
hsa_circ_0002693	2	5	0	0	346.981	860.289	0	0
hsa_circ_0002744	5	3	2	0	867.453	516.173	421.941	0
hsa_circ_0002750	7	6	0	0	1214.43	1032.35	0	0
hsa_circ_0002762	6	3	0	0	1040.94	516.173	0	0
hsa_circ_0002782	165	130	107	47	28626	22367.5	22573.8	10912.5
hsa_circ_0002789	5	0	2	2	867.453	0	421.941	464.36
hsa_circ_0002802	4	3	0	6	693.963	516.173	0	1393.08
hsa_circ_0002876	4	2	3	0	693.963	344.116	632.911	0
hsa_circ_0002922	71	74	0	52	12317.8	12732.3	0	12073.4
hsa_circ_0002926	3	0	4	3	520.472	0	843.882	696.541
hsa_circ_0002928	8	3	4	3	1387.93	516.173	843.882	696.541
hsa_circ_0002985	0	0	2	2	0	0	421.941	464.36
hsa_circ_0002999	0	3	2	2	0	516.173	421.941	464.36
hsa_circ_0003008	4	3	0	0	693.963	516.173	0	0
hsa_circ_0003045	0	0	3	5	0	0	632.911	1160.9
hsa_circ_0003047	2	2	0	0	346.981	344.116	0	0
hsa_circ_0003054	4	0	3	2	693.963	0	632.911	464.36
hsa_circ_0003063	12	22	19	9	2081.89	3785.27	4008.44	2089.62
hsa_circ_0003102	8	2	0	0	1387.93	344.116	0	0
hsa_circ_0003141	0	0	2	2	0	0	421.941	464.36
hsa_circ_0003171	5	5	4	3	867.453	860.289	843.882	696.541
hsa_circ_0003177	4	0	3	3	693.963	0	632.911	696.541
hsa_circ_0003220	2	5	4	0	346.981	860.289	843.882	0
hsa_circ_0003221	3	5	0	0	520.472	860.289	0	0
hsa_circ_0003239	3	6	9	6	520.472	1032.35	1898.73	1393.08
hsa_circ_0003250	3	3	0	6	520.472	516.173	0	1393.08
hsa_circ_0003267	22	17	10	18	3816.79	2924.98	2109.7	4179.24
hsa_circ_0003270	4	0	6	3	693.963	0	1265.82	696.541
hsa_circ_0003273	2	2	0	2	346.981	344.116	0	464.36
hsa_circ_0003295	7	2	2	0	1214.43	344.116	421.941	0
hsa_circ_0003302	4	4	3	4	693.963	688.231	632.911	928.721
hsa_circ_0003322	6	4	0	0	1040.94	688.231	0	0
hsa_circ_0003327	2	3	0	0	346.981	516.173	0	0
hsa_circ_0003353	3	9	0	2	520.472	1548.52	0	464.36
hsa_circ_0003401	0	0	2	5	0	0	421.941	1160.9
hsa_circ_0003441	16	20	8	9	2775.85	3441.16	1687.76	2089.62
hsa_circ_0003458	2	3	5	0	346.981	516.173	1054.85	0
hsa_circ_0003472	4	2	3	2	693.963	344.116	632.911	464.36
hsa_circ_0003500	2	2	6	3	346.981	344.116	1265.82	696.541
hsa_circ_0003502	4	6	5	0	693.963	1032.35	1054.85	0
hsa_circ_0003507	4	0	2	2	693.963	0	421.941	464.36
hsa_circ_0003511	2	2	5	2	346.981	344.116	1054.85	464.36
hsa_circ_0003513	4	4	3	7	693.963	688.231	632.911	1625.26
hsa_circ_0003608	2	3	0	0	346.981	516.173	0	0
hsa_circ_0003632	5	2	3	2	867.453	344.116	632.911	464.36
hsa_circ_0003633	5	3	0	6	867.453	516.173	0	1393.08
hsa_circ_0003643	4	9	0	9	693.963	1548.52	0	2089.62
hsa_circ_0003659	3	8	2	3	520.472	1376.46	421.941	696.541
hsa_circ_0003664	0	3	2	3	0	516.173	421.941	696.541
hsa_circ_0003694	14	11	0	2	2428.87	1892.64	0	464.36
hsa_circ_0003698	9	11	4	4	1561.42	1892.64	843.882	928.721
hsa_circ_0003718	4	4	2	3	693.963	688.231	421.941	696.541
hsa_circ_0003731	12	9	11	25	2081.89	1548.52	2320.68	5804.5
hsa_circ_0003764	4	4	0	0	693.963	688.231	0	0
hsa_circ_0003823	23	22	11	0	3990.28	3785.27	2320.68	0
hsa_circ_0003836	0	2	4	2	0	344.116	843.882	464.36
hsa_circ_0003877	6	3	0	0	1040.94	516.173	0	0
hsa_circ_0003885	2	2	3	0	346.981	344.116	632.911	0
hsa_circ_0003898	4	4	0	0	693.963	688.231	0	0
hsa_circ_0003909	3	5	0	0	520.472	860.289	0	0
hsa_circ_0003915	6	12	5	3	1040.94	2064.69	1054.85	696.541
hsa_circ_0003922	5	2	4	9	867.453	344.116	843.882	2089.62
hsa_circ_0003961	7	3	3	0	1214.43	516.173	632.911	0
hsa_circ_0003965	3	3	0	0	520.472	516.173	0	0
hsa_circ_0004058	12	8	15	6	2081.89	1376.46	3164.56	1393.08
hsa_circ_0004089	2	0	3	4	346.981	0	632.911	928.721
hsa_circ_0004127	3	2	0	0	520.472	344.116	0	0
hsa_circ_0004166	2	3	0	2	346.981	516.173	0	464.36
hsa_circ_0004191	5	6	3	6	867.453	1032.35	632.911	1393.08
hsa_circ_0004210	0	0	3	3	0	0	632.911	696.541
hsa_circ_0004220	4	4	3	3	693.963	688.231	632.911	696.541
hsa_circ_0004243	5	7	2	0	867.453	1204.4	421.941	0
hsa_circ_0004269	12	14	10	3	2081.89	2408.81	2109.7	696.541
hsa_circ_0004270	5	3	3	0	867.453	516.173	632.911	0
hsa_circ_0004273	2	3	0	0	346.981	516.173	0	0
hsa_circ_0004314	12	11	11	10	2081.89	1892.64	2320.68	2321.8
hsa_circ_0004338	0	6	6	6	0	1032.35	1265.82	1393.08
hsa_circ_0004364	4	4	0	0	693.963	688.231	0	0
hsa_circ_0004366	0	2	2	2	0	344.116	421.941	464.36
hsa_circ_0004368	2	2	5	2	346.981	344.116	1054.85	464.36
hsa_circ_0004382	5	4	2	0	867.453	688.231	421.941	0
hsa_circ_0004383	6	2	11	0	1040.94	344.116	2320.68	0
hsa_circ_0004416	7	3	4	2	1214.43	516.173	843.882	464.36
hsa_circ_0004417	22	25	18	10	3816.79	4301.45	3797.47	2321.8
hsa_circ_0004422	3	3	0	0	520.472	516.173	0	0
hsa_circ_0004435	6	3	6	0	1040.94	516.173	1265.82	0
hsa_circ_0004488	7	5	3	0	1214.43	860.289	632.911	0
hsa_circ_0004527	0	0	2	2	0	0	421.941	464.36
hsa_circ_0004565	2	3	4	3	346.981	516.173	843.882	696.541
hsa_circ_0004566	2	2	0	4	346.981	344.116	0	928.721
hsa_circ_0004587	2	7	2	2	346.981	1204.4	421.941	464.36
hsa_circ_0004628	2	2	3	0	346.981	344.116	632.911	0
hsa_circ_0004652	13	7	5	2	2255.38	1204.4	1054.85	464.36
hsa_circ_0004664	2	4	6	3	346.981	688.231	1265.82	696.541
hsa_circ_0004671	6	5	7	2	1040.94	860.289	1476.79	464.36
hsa_circ_0004673	0	3	4	2	0	516.173	843.882	464.36
hsa_circ_0004689	2	5	0	0	346.981	860.289	0	0
hsa_circ_0004771	5	4	5	5	867.453	688.231	1054.85	1160.9
hsa_circ_0004791	10	10	7	2	1734.91	1720.58	1476.79	464.36
hsa_circ_0004805	3	2	6	5	520.472	344.116	1265.82	1160.9
hsa_circ_0004849	7	10	5	6	1214.43	1720.58	1054.85	1393.08
hsa_circ_0004870	3	3	0	0	520.472	516.173	0	0
hsa_circ_0004874	0	3	9	5	0	516.173	1898.73	1160.9
hsa_circ_0004887	0	12	6	3	0	2064.69	1265.82	696.541
hsa_circ_0004915	10	6	8	0	1734.91	1032.35	1687.76	0
hsa_circ_0004924	5	7	9	3	867.453	1204.4	1898.73	696.541
hsa_circ_0004983	2	0	2	2	346.981	0	421.941	464.36
hsa_circ_0004994	3	2	2	10	520.472	344.116	421.941	2321.8
hsa_circ_0005005	2	3	0	0	346.981	516.173	0	0
hsa_circ_0005023	2	4	0	0	346.981	688.231	0	0
hsa_circ_0005044	3	4	0	0	520.472	688.231	0	0
hsa_circ_0005077	4	0	5	4	693.963	0	1054.85	928.721
hsa_circ_0005090	11	11	8	9	1908.4	1892.64	1687.76	2089.62
hsa_circ_0005131	0	0	2	2	0	0	421.941	464.36
hsa_circ_0005142	2	6	0	2	346.981	1032.35	0	464.36
hsa_circ_0005147	4	8	4	5	693.963	1376.46	843.882	1160.9
hsa_circ_0005181	7	4	9	5	1214.43	688.231	1898.73	1160.9
hsa_circ_0005214	5	2	0	0	867.453	344.116	0	0
hsa_circ_0005227	2	2	5	0	346.981	344.116	1054.85	0
hsa_circ_0005231	2	2	0	0	346.981	344.116	0	0
hsa_circ_0005245	16	16	12	4	2775.85	2752.92	2531.65	928.721
hsa_circ_0005251	3	4	2	2	520.472	688.231	421.941	464.36
hsa_circ_0005252	4	6	0	0	693.963	1032.35	0	0
hsa_circ_0005260	10	9	4	4	1734.91	1548.52	843.882	928.721
hsa_circ_0005272	2	2	0	0	346.981	344.116	0	0
hsa_circ_0005281	4	2	0	0	693.963	344.116	0	0
hsa_circ_0005309	2	6	0	0	346.981	1032.35	0	0
hsa_circ_0005311	2	2	10	0	346.981	344.116	2109.7	0
hsa_circ_0005325	2	3	0	0	346.981	516.173	0	0
hsa_circ_0005337	2	2	0	0	346.981	344.116	0	0
hsa_circ_0005379	15	2	8	3	2602.36	344.116	1687.76	696.541
hsa_circ_0005405	4	7	3	2	693.963	1204.4	632.911	464.36
hsa_circ_0005418	4	8	4	2	693.963	1376.46	843.882	464.36
hsa_circ_0005435	3	2	2	4	520.472	344.116	421.941	928.721
hsa_circ_0005465	10	0	4	5	1734.91	0	843.882	1160.9
hsa_circ_0005476	2	4	3	3	346.981	688.231	632.911	696.541
hsa_circ_0005483	4	0	3	6	693.963	0	632.911	1393.08
hsa_circ_0005542	6	0	2	2	1040.94	0	421.941	464.36
hsa_circ_0005567	10	13	5	0	1734.91	2236.75	1054.85	0
hsa_circ_0005581	0	0	4	2	0	0	843.882	464.36
hsa_circ_0005594	0	2	2	2	0	344.116	421.941	464.36
hsa_circ_0005623	6	7	3	0	1040.94	1204.4	632.911	0
hsa_circ_0005630	0	3	2	2	0	516.173	421.941	464.36
hsa_circ_0005638	3	4	0	2	520.472	688.231	0	464.36
hsa_circ_0005646	5	5	8	0	867.453	860.289	1687.76	0
hsa_circ_0005653	3	0	6	2	520.472	0	1265.82	464.36
hsa_circ_0005667	4	4	3	3	693.963	688.231	632.911	696.541
hsa_circ_0005683	4	5	0	4	693.963	860.289	0	928.721
hsa_circ_0005695	10	3	3	0	1734.91	516.173	632.911	0
hsa_circ_0005704	8	2	0	0	1387.93	344.116	0	0
hsa_circ_0005720	4	6	2	0	693.963	1032.35	421.941	0
hsa_circ_0005772	2	5	4	0	346.981	860.289	843.882	0
hsa_circ_0005775	4	2	0	0	693.963	344.116	0	0
hsa_circ_0005841	4	2	3	0	693.963	344.116	632.911	0
hsa_circ_0005881	4	4	4	3	693.963	688.231	843.882	696.541
hsa_circ_0005898	6	13	0	0	1040.94	2236.75	0	0
hsa_circ_0005939	5	10	12	4	867.453	1720.58	2531.65	928.721
hsa_circ_0005941	8	6	4	0	1387.93	1032.35	843.882	0
hsa_circ_0005954	6	4	6	7	1040.94	688.231	1265.82	1625.26
hsa_circ_0005970	2	2	0	0	346.981	344.116	0	0
hsa_circ_0005982	2	9	5	4	346.981	1548.52	1054.85	928.721
hsa_circ_0005988	2	2	0	0	346.981	344.116	0	0
hsa_circ_0006006	8	2	0	4	1387.93	344.116	0	928.721
hsa_circ_0006010	0	0	4	2	0	0	843.882	464.36
hsa_circ_0006049	2	3	0	0	346.981	516.173	0	0
hsa_circ_0006062	0	5	4	2	0	860.289	843.882	464.36
hsa_circ_0006087	0	0	2	5	0	0	421.941	1160.9
hsa_circ_0006114	8	7	2	6	1387.93	1204.4	421.941	1393.08
hsa_circ_0006117	0	0	2	5	0	0	421.941	1160.9
hsa_circ_0006151	8	7	7	2	1387.93	1204.4	1476.79	464.36
hsa_circ_0006157	18	11	8	2	3122.83	1892.64	1687.76	464.36
hsa_circ_0006168	2	3	0	0	346.981	516.173	0	0
hsa_circ_0006189	2	3	0	0	346.981	516.173	0	0
hsa_circ_0006258	22	16	7	5	3816.79	2752.92	1476.79	1160.9
hsa_circ_0006308	0	5	5	5	0	860.289	1054.85	1160.9
hsa_circ_0006324	2	4	4	2	346.981	688.231	843.882	464.36
hsa_circ_0006346	2	4	0	3	346.981	688.231	0	696.541
hsa_circ_0006360	6	4	0	0	1040.94	688.231	0	0
hsa_circ_0006364	4	7	2	3	693.963	1204.4	421.941	696.541
hsa_circ_0006373	0	4	4	5	0	688.231	843.882	1160.9
hsa_circ_0006381	0	0	2	2	0	0	421.941	464.36
hsa_circ_0006393	0	0	2	3	0	0	421.941	696.541
hsa_circ_0006508	4	7	13	4	693.963	1204.4	2742.62	928.721
hsa_circ_0006528	5	6	4	0	867.453	1032.35	843.882	0
hsa_circ_0006539	3	2	0	0	520.472	344.116	0	0
hsa_circ_0006609	12	5	4	0	2081.89	860.289	843.882	0
hsa_circ_0006675	2	5	3	2	346.981	860.289	632.911	464.36
hsa_circ_0006702	27	17	8	10	4684.25	2924.98	1687.76	2321.8
hsa_circ_0006727	0	0	2	3	0	0	421.941	696.541
hsa_circ_0006801	3	5	0	0	520.472	860.289	0	0
hsa_circ_0006848	4	5	3	0	693.963	860.289	632.911	0
hsa_circ_0006849	0	3	4	2	0	516.173	843.882	464.36
hsa_circ_0006856	4	3	0	0	693.963	516.173	0	0
hsa_circ_0006881	3	2	3	0	520.472	344.116	632.911	0
hsa_circ_0006916	2	2	5	0	346.981	344.116	1054.85	0
hsa_circ_0006922	3	6	9	6	520.472	1032.35	1898.73	1393.08
hsa_circ_0006948	2	4	0	0	346.981	688.231	0	0
hsa_circ_0006956	3	2	5	0	520.472	344.116	1054.85	0
hsa_circ_0006990	5	8	5	4	867.453	1376.46	1054.85	928.721
hsa_circ_0007001	4	4	0	0	693.963	688.231	0	0
hsa_circ_0007099	6	5	0	2	1040.94	860.289	0	464.36
hsa_circ_0007108	2	3	2	0	346.981	516.173	421.941	0
hsa_circ_0007127	16	8	23	5	2775.85	1376.46	4852.32	1160.9
hsa_circ_0007130	6	7	0	0	1040.94	1204.4	0	0
hsa_circ_0007144	33	31	16	7	5725.19	5333.79	3375.53	1625.26
hsa_circ_0007162	5	4	5	0	867.453	688.231	1054.85	0
hsa_circ_0007178	3	5	0	0	520.472	860.289	0	0
hsa_circ_0007259	6	2	4	6	1040.94	344.116	843.882	1393.08
hsa_circ_0007271	4	3	0	5	693.963	516.173	0	1160.9
hsa_circ_0007292	13	15	13	16	2255.38	2580.87	2742.62	3714.88
hsa_circ_0007308	6	2	0	4	1040.94	344.116	0	928.721
hsa_circ_0007418	3	2	0	2	520.472	344.116	0	464.36
hsa_circ_0007430	0	2	6	4	0	344.116	1265.82	928.721
hsa_circ_0007440	2	5	2	0	346.981	860.289	421.941	0
hsa_circ_0007444	5	12	3	9	867.453	2064.69	632.911	2089.62
hsa_circ_0007466	4	7	0	4	693.963	1204.4	0	928.721
hsa_circ_0007477	2	4	0	0	346.981	688.231	0	0
hsa_circ_0007487	6	7	5	0	1040.94	1204.4	1054.85	0
hsa_circ_0007509	6	9	7	0	1040.94	1548.52	1476.79	0
hsa_circ_0007542	6	7	4	0	1040.94	1204.4	843.882	0
hsa_circ_0007582	6	3	5	0	1040.94	516.173	1054.85	0
hsa_circ_0007621	2	4	2	0	346.981	688.231	421.941	0
hsa_circ_0007641	2	2	0	4	346.981	344.116	0	928.721
hsa_circ_0007646	6	4	5	8	1040.94	688.231	1054.85	1857.44
hsa_circ_0007701	2	7	0	0	346.981	1204.4	0	0
hsa_circ_0007772	2	4	0	0	346.981	688.231	0	0
hsa_circ_0007788	7	7	0	0	1214.43	1204.4	0	0
hsa_circ_0007804	0	0	2	3	0	0	421.941	696.541
hsa_circ_0007846	5	5	4	10	867.453	860.289	843.882	2321.8
hsa_circ_0007908	7	9	8	4	1214.43	1548.52	1687.76	928.721
hsa_circ_0007918	6	15	6	5	1040.94	2580.87	1265.82	1160.9
hsa_circ_0007930	6	0	3	2	1040.94	0	632.911	464.36
hsa_circ_0007941	3	11	3	0	520.472	1892.64	632.911	0
hsa_circ_0007948	0	0	2	2	0	0	421.941	464.36
hsa_circ_0007976	4	4	0	0	693.963	688.231	0	0
hsa_circ_0008011	3	0	7	3	520.472	0	1476.79	696.541
hsa_circ_0008032	0	3	3	3	0	516.173	632.911	696.541
hsa_circ_0008039	6	3	0	9	1040.94	516.173	0	2089.62
hsa_circ_0008043	24	21	23	20	4163.78	3613.21	4852.32	4643.6
hsa_circ_0008054	2	2	0	2	346.981	344.116	0	464.36
hsa_circ_0008058	7	7	6	3	1214.43	1204.4	1265.82	696.541
hsa_circ_0008075	0	0	3	4	0	0	632.911	928.721
hsa_circ_0008083	4	6	0	2	693.963	1032.35	0	464.36
hsa_circ_0008131	3	2	0	8	520.472	344.116	0	1857.44
hsa_circ_0008177	2	2	0	0	346.981	344.116	0	0
hsa_circ_0008193	6	12	2	9	1040.94	2064.69	421.941	2089.62
hsa_circ_0008197	2	2	4	2	346.981	344.116	843.882	464.36
hsa_circ_0008199	4	8	6	3	693.963	1376.46	1265.82	696.541
hsa_circ_0008202	2	4	0	3	346.981	688.231	0	696.541
hsa_circ_0008210	7	5	4	2	1214.43	860.289	843.882	464.36
hsa_circ_0008230	4	4	2	0	693.963	688.231	421.941	0
hsa_circ_0008261	2	2	0	0	346.981	344.116	0	0
hsa_circ_0008265	5	5	0	2	867.453	860.289	0	464.36
hsa_circ_0008278	3	8	12	0	520.472	1376.46	2531.65	0
hsa_circ_0008303	6	4	10	0	1040.94	688.231	2109.7	0
hsa_circ_0008309	7	13	6	3	1214.43	2236.75	1265.82	696.541
hsa_circ_0008319	3	4	2	2	520.472	688.231	421.941	464.36
hsa_circ_0008342	4	6	7	0	693.963	1032.35	1476.79	0
hsa_circ_0008345	5	3	5	0	867.453	516.173	1054.85	0
hsa_circ_0008351	4	4	0	0	693.963	688.231	0	0
hsa_circ_0008382	0	3	8	9	0	516.173	1687.76	2089.62
hsa_circ_0008417	3	2	0	0	520.472	344.116	0	0
hsa_circ_0008433	0	0	10	4	0	0	2109.7	928.721
hsa_circ_0008460	6	4	5	0	1040.94	688.231	1054.85	0
hsa_circ_0008494	11	8	3	12	1908.4	1376.46	632.911	2786.16
hsa_circ_0008500	9	14	5	7	1561.42	2408.81	1054.85	1625.26
hsa_circ_0008599	2	4	4	0	346.981	688.231	843.882	0
hsa_circ_0008621	2	0	5	6	346.981	0	1054.85	1393.08
hsa_circ_0008629	2	2	3	0	346.981	344.116	632.911	0
hsa_circ_0008640	2	0	4	2	346.981	0	843.882	464.36
hsa_circ_0008647	6	6	0	2	1040.94	1032.35	0	464.36
hsa_circ_0008678	8	5	3	3	1387.93	860.289	632.911	696.541
hsa_circ_0008683	7	8	7	0	1214.43	1376.46	1476.79	0
hsa_circ_0008694	6	2	0	0	1040.94	344.116	0	0
hsa_circ_0008719	0	0	3	3	0	0	632.911	696.541
hsa_circ_0008720	8	6	0	5	1387.93	1032.35	0	1160.9
hsa_circ_0008777	21	11	21	5	3643.3	1892.64	4430.38	1160.9
hsa_circ_0008797	4	2	0	3	693.963	344.116	0	696.541
hsa_circ_0008798	0	0	2	3	0	0	421.941	696.541
hsa_circ_0008812	2	0	2	7	346.981	0	421.941	1625.26
hsa_circ_0008861	8	3	4	3	1387.93	516.173	843.882	696.541
hsa_circ_0008881	2	3	0	0	346.981	516.173	0	0
hsa_circ_0008886	5	2	0	0	867.453	344.116	0	0
hsa_circ_0008922	13	19	8	16	2255.38	3269.1	1687.76	3714.88
hsa_circ_0008927	5	3	2	0	867.453	516.173	421.941	0
hsa_circ_0008928	0	4	9	3	0	688.231	1898.73	696.541
hsa_circ_0008938	3	4	7	0	520.472	688.231	1476.79	0
hsa_circ_0008951	2	0	2	4	346.981	0	421.941	928.721
hsa_circ_0008953	10	4	3	6	1734.91	688.231	632.911	1393.08
hsa_circ_0008967	5	4	6	0	867.453	688.231	1265.82	0
hsa_circ_0009008	3	12	0	0	520.472	2064.69	0	0
hsa_circ_0009022	12	9	7	2	2081.89	1548.52	1476.79	464.36
hsa_circ_0009035	7	4	2	2	1214.43	688.231	421.941	464.36
hsa_circ_0009037	6	3	2	0	1040.94	516.173	421.941	0
hsa_circ_0009043	17	12	14	8	2949.34	2064.69	2953.59	1857.44
hsa_circ_0009064	3	5	0	0	520.472	860.289	0	0
hsa_circ_0009084	3	2	0	0	520.472	344.116	0	0
hsa_circ_0009110	0	0	2	3	0	0	421.941	696.541
hsa_circ_0009158	4	5	0	3	693.963	860.289	0	696.541
hsa_circ_0010458	6	0	5	3	1040.94	0	1054.85	696.541
hsa_circ_0012553	2	4	2	0	346.981	688.231	421.941	0
hsa_circ_0012823	0	0	2	3	0	0	421.941	696.541
hsa_circ_0013167	0	0	6	2	0	0	1265.82	464.36
hsa_circ_0013222	5	5	5	2	867.453	860.289	1054.85	464.36
hsa_circ_0014292	0	0	2	4	0	0	421.941	928.721
hsa_circ_0014577	0	0	4	2	0	0	843.882	464.36
hsa_circ_0014606	7	4	2	18	1214.43	688.231	421.941	4179.24
hsa_circ_0015027	3	2	0	2	520.472	344.116	0	464.36
hsa_circ_0015259	10	2	5	0	1734.91	344.116	1054.85	0
hsa_circ_0015260	2	6	0	0	346.981	1032.35	0	0
hsa_circ_0015261	3	4	3	0	520.472	688.231	632.911	0
hsa_circ_0016599	11	12	11	16	1908.4	2064.69	2320.68	3714.88
hsa_circ_0016600	4	3	15	0	693.963	516.173	3164.56	0
hsa_circ_0016601	12	25	39	24	2081.89	4301.45	8227.85	5572.32
hsa_circ_0016867	4	0	5	5	693.963	0	1054.85	1160.9
hsa_circ_0016956	5	0	5	2	867.453	0	1054.85	464.36
hsa_circ_0016957	3	3	0	0	520.472	516.173	0	0
hsa_circ_0017289	8	19	6	9	1387.93	3269.1	1265.82	2089.62
hsa_circ_0017586	5	3	2	0	867.453	516.173	421.941	0
hsa_circ_0017636	5	2	7	0	867.453	344.116	1476.79	0
hsa_circ_0018401	0	4	2	7	0	688.231	421.941	1625.26
hsa_circ_0018478	8	5	5	2	1387.93	860.289	1054.85	464.36
hsa_circ_0018484	2	3	2	2	346.981	516.173	421.941	464.36
hsa_circ_0018524	4	4	0	0	693.963	688.231	0	0
hsa_circ_0018992	12	5	0	0	2081.89	860.289	0	0
hsa_circ_0018998	4	7	3	2	693.963	1204.4	632.911	464.36
hsa_circ_0019170	5	7	2	7	867.453	1204.4	421.941	1625.26
hsa_circ_0019446	3	3	4	0	520.472	516.173	843.882	0
hsa_circ_0021089	2	4	0	0	346.981	688.231	0	0
hsa_circ_0021570	16	13	22	15	2775.85	2236.75	4641.35	3482.7
hsa_circ_0021712	7	5	3	6	1214.43	860.289	632.911	1393.08
hsa_circ_0023694	2	2	0	5	346.981	344.116	0	1160.9
hsa_circ_0023891	0	5	2	3	0	860.289	421.941	696.541
hsa_circ_0023919	5	7	3	2	867.453	1204.4	632.911	464.36
hsa_circ_0023923	7	5	7	4	1214.43	860.289	1476.79	928.721
hsa_circ_0023936	6	4	2	0	1040.94	688.231	421.941	0
hsa_circ_0025349	6	8	0	7	1040.94	1376.46	0	1625.26
hsa_circ_0025570	3	3	0	2	520.472	516.173	0	464.36
hsa_circ_0025619	3	4	0	0	520.472	688.231	0	0
hsa_circ_0025882	4	2	0	0	693.963	344.116	0	0
hsa_circ_0025953	2	3	0	0	346.981	516.173	0	0
hsa_circ_0027491	3	2	0	5	520.472	344.116	0	1160.9
hsa_circ_0027702	11	7	3	2	1908.4	1204.4	632.911	464.36
hsa_circ_0028088	2	3	2	0	346.981	516.173	421.941	0
hsa_circ_0029434	8	9	0	3	1387.93	1548.52	0	696.541
hsa_circ_0029775	2	4	0	2	346.981	688.231	0	464.36
hsa_circ_0029976	2	4	4	0	346.981	688.231	843.882	0
hsa_circ_0030389	6	4	4	5	1040.94	688.231	843.882	1160.9
hsa_circ_0030632	2	3	2	4	346.981	516.173	421.941	928.721
hsa_circ_0030720	6	6	5	6	1040.94	1032.35	1054.85	1393.08
hsa_circ_0031482	3	9	3	3	520.472	1548.52	632.911	696.541
hsa_circ_0031584	9	18	0	9	1561.42	3097.04	0	2089.62
hsa_circ_0031607	19	19	14	9	3296.32	3269.1	2953.59	2089.62
hsa_circ_0031608	9	9	10	0	1561.42	1548.52	2109.7	0
hsa_circ_0031884	0	0	2	2	0	0	421.941	464.36
hsa_circ_0032029	5	0	6	7	867.453	0	1265.82	1625.26
hsa_circ_0032965	6	7	7	2	1040.94	1204.4	1476.79	464.36
hsa_circ_0032969	4	7	13	7	693.963	1204.4	2742.62	1625.26
hsa_circ_0034293	4	4	0	4	693.963	688.231	0	928.721
hsa_circ_0034803	2	2	0	0	346.981	344.116	0	0
hsa_circ_0035189	10	11	7	3	1734.91	1892.64	1476.79	696.541
hsa_circ_0035285	0	6	7	2	0	1032.35	1476.79	464.36
hsa_circ_0036372	10	7	8	3	1734.91	1204.4	1687.76	696.541
hsa_circ_0036610	3	2	0	0	520.472	344.116	0	0
hsa_circ_0036629	0	4	3	7	0	688.231	632.911	1625.26
hsa_circ_0038111	4	4	3	0	693.963	688.231	632.911	0
hsa_circ_0038816	0	0	2	3	0	0	421.941	696.541
hsa_circ_0039264	5	5	3	5	867.453	860.289	632.911	1160.9
hsa_circ_0040809	2	3	3	11	346.981	516.173	632.911	2553.98
hsa_circ_0040823	9	8	2	6	1561.42	1376.46	421.941	1393.08
hsa_circ_0041150	33	33	22	8	5725.19	5677.91	4641.35	1857.44
hsa_circ_0041152	9	5	0	0	1561.42	860.289	0	0
hsa_circ_0041153	21	18	9	11	3643.3	3097.04	1898.73	2553.98
hsa_circ_0041154	3	3	2	2	520.472	516.173	421.941	464.36
hsa_circ_0042091	0	3	5	4	0	516.173	1054.85	928.721
hsa_circ_0042498	4	4	0	0	693.963	688.231	0	0
hsa_circ_0044686	6	3	3	0	1040.94	516.173	632.911	0
hsa_circ_0045006	2	2	0	0	346.981	344.116	0	0
hsa_circ_0047270	8	8	6	13	1387.93	1376.46	1265.82	3018.34
hsa_circ_0048000	2	7	0	0	346.981	1204.4	0	0
hsa_circ_0052767	3	2	2	0	520.472	344.116	421.941	0
hsa_circ_0052852	2	0	3	3	346.981	0	632.911	696.541
hsa_circ_0052943	0	0	2	3	0	0	421.941	696.541
hsa_circ_0054886	4	2	2	4	693.963	344.116	421.941	928.721
hsa_circ_0055904	0	0	2	2	0	0	421.941	464.36
hsa_circ_0055906	0	2	2	2	0	344.116	421.941	464.36
hsa_circ_0055945	2	3	4	10	346.981	516.173	843.882	2321.8
hsa_circ_0056037	3	2	0	0	520.472	344.116	0	0
hsa_circ_0057105	6	8	7	2	1040.94	1376.46	1476.79	464.36
hsa_circ_0057123	2	0	6	2	346.981	0	1265.82	464.36
hsa_circ_0057523	3	4	0	0	520.472	688.231	0	0
hsa_circ_0058039	0	6	2	3	0	1032.35	421.941	696.541
hsa_circ_0058042	2	3	2	0	346.981	516.173	421.941	0
hsa_circ_0058051	5	3	0	0	867.453	516.173	0	0
hsa_circ_0058493	11	9	11	4	1908.4	1548.52	2320.68	928.721
hsa_circ_0058495	18	14	11	4	3122.83	2408.81	2320.68	928.721
hsa_circ_0058806	4	3	4	0	693.963	516.173	843.882	0
hsa_circ_0058912	4	3	6	0	693.963	516.173	1265.82	0
hsa_circ_0061774	6	8	0	0	1040.94	1376.46	0	0
hsa_circ_0061776	7	6	0	0	1214.43	1032.35	0	0
hsa_circ_0062603	2	4	2	0	346.981	688.231	421.941	0
hsa_circ_0062642	8	2	0	0	1387.93	344.116	0	0
hsa_circ_0062688	2	10	0	2	346.981	1720.58	0	464.36
hsa_circ_0065244	3	3	0	0	520.472	516.173	0	0
hsa_circ_0065301	4	2	0	3	693.963	344.116	0	696.541
hsa_circ_0065307	3	2	0	0	520.472	344.116	0	0
hsa_circ_0067985	3	6	0	5	520.472	1032.35	0	1160.9
hsa_circ_0069101	4	4	0	0	693.963	688.231	0	0
hsa_circ_0069725	3	3	0	0	520.472	516.173	0	0
hsa_circ_0069981	4	2	0	10	693.963	344.116	0	2321.8
hsa_circ_0069982	9	4	6	9	1561.42	688.231	1265.82	2089.62
hsa_circ_0070022	5	3	7	4	867.453	516.173	1476.79	928.721
hsa_circ_0070039	6	6	0	4	1040.94	1032.35	0	928.721
hsa_circ_0071185	3	8	2	0	520.472	1376.46	421.941	0
hsa_circ_0071375	13	0	8	3	2255.38	0	1687.76	696.541
hsa_circ_0071653	18	13	0	10	3122.83	2236.75	0	2321.8
hsa_circ_0072309	12	20	13	10	2081.89	3441.16	2742.62	2321.8
hsa_circ_0072568	3	3	3	2	520.472	516.173	632.911	464.36
hsa_circ_0072688	3	5	0	15	520.472	860.289	0	3482.7
hsa_circ_0073371	2	5	3	3	346.981	860.289	632.911	696.541
hsa_circ_0073517	2	0	3	5	346.981	0	632.911	1160.9
hsa_circ_0073608	6	3	2	0	1040.94	516.173	421.941	0
hsa_circ_0073706	0	0	7	2	0	0	1476.79	464.36
hsa_circ_0073904	0	0	2	3	0	0	421.941	696.541
hsa_circ_0074061	5	7	0	3	867.453	1204.4	0	696.541
hsa_circ_0074104	2	2	0	0	346.981	344.116	0	0
hsa_circ_0074159	3	3	0	0	520.472	516.173	0	0
hsa_circ_0075158	4	6	12	6	693.963	1032.35	2531.65	1393.08
hsa_circ_0075346	0	0	2	3	0	0	421.941	696.541
hsa_circ_0075357	3	2	0	0	520.472	344.116	0	0
hsa_circ_0075835	6	5	0	2	1040.94	860.289	0	464.36
hsa_circ_0076961	3	2	0	0	520.472	344.116	0	0
hsa_circ_0077216	5	4	2	3	867.453	688.231	421.941	696.541
hsa_circ_0077495	2	6	10	0	346.981	1032.35	2109.7	0
hsa_circ_0078617	5	9	7	5	867.453	1548.52	1476.79	1160.9
hsa_circ_0078632	4	3	0	0	693.963	516.173	0	0
hsa_circ_0079040	9	4	0	0	1561.42	688.231	0	0
hsa_circ_0079480	3	2	0	0	520.472	344.116	0	0
hsa_circ_0079673	3	4	3	2	520.472	688.231	632.911	464.36
hsa_circ_0080835	4	4	0	0	693.963	688.231	0	0
hsa_circ_0081808	0	0	8	2	0	0	1687.76	464.36
hsa_circ_0083229	2	2	0	0	346.981	344.116	0	0
hsa_circ_0083390	3	2	4	2	520.472	344.116	843.882	464.36
hsa_circ_0083470	2	2	0	2	346.981	344.116	0	464.36
hsa_circ_0084606	4	2	0	10	693.963	344.116	0	2321.8
hsa_circ_0084615	57	78	32	61	9888.97	13420.5	6751.05	14163
hsa_circ_0085323	2	3	0	2	346.981	516.173	0	464.36
hsa_circ_0085438	4	5	11	0	693.963	860.289	2320.68	0
hsa_circ_0085439	2	11	6	0	346.981	1892.64	1265.82	0
hsa_circ_0085440	5	7	4	8	867.453	1204.4	843.882	1857.44
hsa_circ_0085441	0	2	4	7	0	344.116	843.882	1625.26
hsa_circ_0086726	5	3	7	4	867.453	516.173	1476.79	928.721
hsa_circ_0087199	4	3	3	3	693.963	516.173	632.911	696.541
hsa_circ_0087200	9	22	2	15	1561.42	3785.27	421.941	3482.7
hsa_circ_0087234	3	8	0	0	520.472	1376.46	0	0
hsa_circ_0087255	2	4	0	0	346.981	688.231	0	0
hsa_circ_0087357	18	18	12	11	3122.83	3097.04	2531.65	2553.98
hsa_circ_0087386	4	0	2	7	693.963	0	421.941	1625.26
hsa_circ_0087391	7	9	0	5	1214.43	1548.52	0	1160.9
hsa_circ_0087605	0	6	5	4	0	1032.35	1054.85	928.721
hsa_circ_0088030	10	19	9	16	1734.91	3269.1	1898.73	3714.88
hsa_circ_0088300	0	0	6	2	0	0	1265.82	464.36
hsa_circ_0089254	2	2	0	0	346.981	344.116	0	0
hsa_circ_0089371	2	2	0	14	346.981	344.116	0	3250.52
hsa_circ_0089466	0	0	3	3	0	0	632.911	696.541
hsa_circ_0090162	5	7	6	2	867.453	1204.4	1265.82	464.36
hsa_circ_0091065	0	0	4	2	0	0	843.882	464.36
hsa_circ_0091187	6	9	8	4	1040.94	1548.52	1687.76	928.721
hsa_circ_0091483	2	5	2	0	346.981	860.289	421.941	0
hsa_circ_0091537	0	0	2	3	0	0	421.941	696.541
novel_circ_0000067	3	11	0	0	520.472	1892.64	0	0
novel_circ_0000069	3	3	4	0	520.472	516.173	843.882	0
novel_circ_0000079	2	0	4	3	346.981	0	843.882	696.541
novel_circ_0000089	10	4	6	4	1734.91	688.231	1265.82	928.721
novel_circ_0000149	3	2	0	0	520.472	344.116	0	0
novel_circ_0000225	2	2	0	0	346.981	344.116	0	0
novel_circ_0000267	2	2	0	0	346.981	344.116	0	0
novel_circ_0000306	5	0	3	2	867.453	0	632.911	464.36
novel_circ_0000309	2	3	3	0	346.981	516.173	632.911	0
novel_circ_0000312	5	3	0	2	867.453	516.173	0	464.36
novel_circ_0000329	5	4	6	0	867.453	688.231	1265.82	0
novel_circ_0000354	2	4	4	0	346.981	688.231	843.882	0
novel_circ_0000366	5	2	0	0	867.453	344.116	0	0
novel_circ_0000369	4	2	2	0	693.963	344.116	421.941	0
novel_circ_0000380	3	6	7	10	520.472	1032.35	1476.79	2321.8
novel_circ_0000381	7	9	0	0	1214.43	1548.52	0	0
novel_circ_0000426	2	2	0	4	346.981	344.116	0	928.721
novel_circ_0000434	4	6	12	6	693.963	1032.35	2531.65	1393.08
novel_circ_0000491	2	3	0	0	346.981	516.173	0	0
novel_circ_0000503	7	2	2	2	1214.43	344.116	421.941	464.36
novel_circ_0000504	9	4	2	4	1561.42	688.231	421.941	928.721
novel_circ_0000515	2	5	0	0	346.981	860.289	0	0
novel_circ_0000542	3	4	3	0	520.472	688.231	632.911	0
novel_circ_0000551	0	0	3	5	0	0	632.911	1160.9
novel_circ_0000555	8	0	2	2	1387.93	0	421.941	464.36
novel_circ_0000612	3	0	7	6	520.472	0	1476.79	1393.08
novel_circ_0000622	4	2	2	4	693.963	344.116	421.941	928.721
novel_circ_0000626	14	6	5	4	2428.87	1032.35	1054.85	928.721
novel_circ_0000638	9	0	6	15	1561.42	0	1265.82	3482.7
novel_circ_0000640	0	0	3	13	0	0	632.911	3018.34
novel_circ_0000642	3	0	5	10	520.472	0	1054.85	2321.8
novel_circ_0000644	0	0	2	2	0	0	421.941	464.36
novel_circ_0000646	2	3	0	8	346.981	516.173	0	1857.44
novel_circ_0000647	0	0	7	6	0	0	1476.79	1393.08
novel_circ_0000648	0	4	7	9	0	688.231	1476.79	2089.62
novel_circ_0000650	6	3	9	11	1040.94	516.173	1898.73	2553.98
novel_circ_0000651	0	6	8	14	0	1032.35	1687.76	3250.52
novel_circ_0000653	0	0	7	2	0	0	1476.79	464.36
novel_circ_0000656	4	6	10	2	693.963	1032.35	2109.7	464.36
novel_circ_0000660	0	0	5	3	0	0	1054.85	696.541
novel_circ_0000661	8	5	12	7	1387.93	860.289	2531.65	1625.26
novel_circ_0000687	6	2	0	0	1040.94	344.116	0	0
novel_circ_0000702	3	3	0	0	520.472	516.173	0	0
novel_circ_0000711	4	6	3	3	693.963	1032.35	632.911	696.541
novel_circ_0000725	0	0	2	2	0	0	421.941	464.36
novel_circ_0000757	19	18	34	21	3296.32	3097.04	7173	4875.78
novel_circ_0000824	4	7	2	3	693.963	1204.4	421.941	696.541
novel_circ_0000846	5	2	0	0	867.453	344.116	0	0
novel_circ_0000857	0	3	3	3	0	516.173	632.911	696.541
novel_circ_0000861	2	2	0	0	346.981	344.116	0	0
novel_circ_0000863	3	5	7	3	520.472	860.289	1476.79	696.541
novel_circ_0000932	0	0	2	4	0	0	421.941	928.721
novel_circ_0000973	2	2	0	0	346.981	344.116	0	0
novel_circ_0000982	13	5	0	0	2255.38	860.289	0	0
novel_circ_0001040	2	3	0	0	346.981	516.173	0	0
novel_circ_0001058	4	7	2	3	693.963	1204.4	421.941	696.541
novel_circ_0001059	0	2	8	2	0	344.116	1687.76	464.36
novel_circ_0001063	8	6	6	3	1387.93	1032.35	1265.82	696.541
novel_circ_0001089	6	8	0	0	1040.94	1376.46	0	0
novel_circ_0001101	0	0	5	7	0	0	1054.85	1625.26
novel_circ_0001102	0	0	10	3	0	0	2109.7	696.541
novel_circ_0001107	5	4	2	2	867.453	688.231	421.941	464.36
novel_circ_0001112	13	22	7	9	2255.38	3785.27	1476.79	2089.62
novel_circ_0001179	2	3	0	0	346.981	516.173	0	0
novel_circ_0001187	4	3	0	0	693.963	516.173	0	0
novel_circ_0001228	6	0	3	2	1040.94	0	632.911	464.36
novel_circ_0001258	11	6	2	0	1908.4	1032.35	421.941	0
novel_circ_0001266	3	2	0	0	520.472	344.116	0	0
novel_circ_0001278	3	4	0	0	520.472	688.231	0	0
novel_circ_0001283	0	0	3	2	0	0	632.911	464.36
novel_circ_0001295	3	5	0	0	520.472	860.289	0	0
novel_circ_0001298	0	5	3	3	0	860.289	632.911	696.541
novel_circ_0001322	6	3	0	0	1040.94	516.173	0	0
novel_circ_0001329	4	5	4	2	693.963	860.289	843.882	464.36
novel_circ_0001331	0	0	28	2	0	0	5907.17	464.36
novel_circ_0001347	2	3	3	4	346.981	516.173	632.911	928.721
novel_circ_0001361	3	4	0	0	520.472	688.231	0	0
novel_circ_0001369	0	2	2	4	0	344.116	421.941	928.721
novel_circ_0001378	0	0	5	5	0	0	1054.85	1160.9
novel_circ_0001382	0	3	2	2	0	516.173	421.941	464.36
novel_circ_0001422	4	3	3	0	693.963	516.173	632.911	0
novel_circ_0001470	5	0	2	3	867.453	0	421.941	696.541
novel_circ_0001476	13	23	21	0	2255.38	3957.33	4430.38	0
novel_circ_0001477	7	11	10	2	1214.43	1892.64	2109.7	464.36
novel_circ_0001485	27	28	36	24	4684.25	4817.62	7594.94	5572.32
novel_circ_0001513	2	4	0	0	346.981	688.231	0	0
novel_circ_0001515	4	5	5	6	693.963	860.289	1054.85	1393.08
novel_circ_0001587	0	0	3	4	0	0	632.911	928.721
novel_circ_0001588	2	4	0	0	346.981	688.231	0	0
novel_circ_0001651	6	5	7	6	1040.94	860.289	1476.79	1393.08
novel_circ_0001716	6	4	10	7	1040.94	688.231	2109.7	1625.26
novel_circ_0001717	0	5	9	2	0	860.289	1898.73	464.36
novel_circ_0001748	3	6	0	0	520.472	1032.35	0	0
novel_circ_0001763	7	2	0	2	1214.43	344.116	0	464.36
novel_circ_0001783	3	3	0	0	520.472	516.173	0	0
novel_circ_0001789	5	12	4	6	867.453	2064.69	843.882	1393.08
novel_circ_0001790	6	5	0	0	1040.94	860.289	0	0
novel_circ_0001827	3	5	6	0	520.472	860.289	1265.82	0
novel_circ_0001867	2	5	2	2	346.981	860.289	421.941	464.36
novel_circ_0001874	5	4	2	0	867.453	688.231	421.941	0
novel_circ_0001881	5	2	4	3	867.453	344.116	843.882	696.541
novel_circ_0001973	7	2	8	3	1214.43	344.116	1687.76	696.541
novel_circ_0001975	10	10	2	7	1734.91	1720.58	421.941	1625.26
novel_circ_0002053	6	5	7	0	1040.94	860.289	1476.79	0
novel_circ_0002066	7	7	5	4	1214.43	1204.4	1054.85	928.721
novel_circ_0002102	9	3	0	0	1561.42	516.173	0	0
novel_circ_0002121	3	3	3	2	520.472	516.173	632.911	464.36
novel_circ_0002123	0	0	4	2	0	0	843.882	464.36
novel_circ_0002129	4	6	8	5	693.963	1032.35	1687.76	1160.9
novel_circ_0002151	5	6	5	0	867.453	1032.35	1054.85	0
novel_circ_0002297	3	3	0	0	520.472	516.173	0	0
novel_circ_0002298	25	17	6	6	4337.27	2924.98	1265.82	1393.08
novel_circ_0002300	28	26	40	14	4857.74	4473.5	8438.82	3250.52
novel_circ_0002310	4	4	0	0	693.963	688.231	0	0
novel_circ_0002319	4	3	11	0	693.963	516.173	2320.68	0
novel_circ_0002337	20	24	15	14	3469.81	4129.39	3164.56	3250.52
novel_circ_0002393	0	4	6	11	0	688.231	1265.82	2553.98
novel_circ_0002405	4	7	2	0	693.963	1204.4	421.941	0
novel_circ_0002450	0	8	2	6	0	1376.46	421.941	1393.08
novel_circ_0002468	2	2	0	2	346.981	344.116	0	464.36
novel_circ_0002470	9	5	0	2	1561.42	860.289	0	464.36
novel_circ_0002541	4	0	6	2	693.963	0	1265.82	464.36
novel_circ_0002546	83	83	0	59	14399.7	14280.8	0	13698.6
novel_circ_0002554	0	3	2	2	0	516.173	421.941	464.36
novel_circ_0002623	6	3	4	2	1040.94	516.173	843.882	464.36
novel_circ_0002642	6	5	0	4	1040.94	860.289	0	928.721
novel_circ_0002645	8	18	7	4	1387.93	3097.04	1476.79	928.721
novel_circ_0002667	6	8	2	0	1040.94	1376.46	421.941	0
novel_circ_0002684	3	6	0	0	520.472	1032.35	0	0
novel_circ_0002697	5	4	2	4	867.453	688.231	421.941	928.721
novel_circ_0002698	22	22	16	12	3816.79	3785.27	3375.53	2786.16
novel_circ_0002717	0	2	2	3	0	344.116	421.941	696.541
novel_circ_0002721	19	17	0	2	3296.32	2924.98	0	464.36
novel_circ_0002771	0	3	3	2	0	516.173	632.911	464.36
novel_circ_0002795	8	5	5	0	1387.93	860.289	1054.85	0
novel_circ_0002797	2	6	0	0	346.981	1032.35	0	0
novel_circ_0002798	0	0	2	2	0	0	421.941	464.36
novel_circ_0002880	18	12	12	10	3122.83	2064.69	2531.65	2321.8
novel_circ_0002883	7	4	11	9	1214.43	688.231	2320.68	2089.62
novel_circ_0002905	24	17	15	2	4163.78	2924.98	3164.56	464.36
novel_circ_0002935	5	4	0	2	867.453	688.231	0	464.36
novel_circ_0002937	8	3	4	0	1387.93	516.173	843.882	0
novel_circ_0002964	5	10	5	3	867.453	1720.58	1054.85	696.541
novel_circ_0002976	0	4	6	8	0	688.231	1265.82	1857.44
novel_circ_0002990	2	11	12	8	346.981	1892.64	2531.65	1857.44
novel_circ_0002993	2	0	2	3	346.981	0	421.941	696.541
novel_circ_0002996	0	0	3	5	0	0	632.911	1160.9
novel_circ_0002997	2	3	13	8	346.981	516.173	2742.62	1857.44
novel_circ_0002998	2	6	3	4	346.981	1032.35	632.911	928.721
novel_circ_0003002	3	4	3	2	520.472	688.231	632.911	464.36
novel_circ_0003031	9	4	8	6	1561.42	688.231	1687.76	1393.08
novel_circ_0003033	4	2	3	0	693.963	344.116	632.911	0
novel_circ_0003052	0	0	4	2	0	0	843.882	464.36
novel_circ_0003098	0	0	5	4	0	0	1054.85	928.721
novel_circ_0003103	0	2	2	2	0	344.116	421.941	464.36
novel_circ_0003133	3	4	3	0	520.472	688.231	632.911	0
novel_circ_0003148	3	2	0	2	520.472	344.116	0	464.36
novel_circ_0003207	3	4	5	4	520.472	688.231	1054.85	928.721
novel_circ_0003210	0	3	3	6	0	516.173	632.911	1393.08
novel_circ_0003219	0	0	2	2	0	0	421.941	464.36
novel_circ_0003222	14	9	13	3	2428.87	1548.52	2742.62	696.541
novel_circ_0003242	0	6	3	3	0	1032.35	632.911	696.541
novel_circ_0003249	3	5	0	0	520.472	860.289	0	0
novel_circ_0003273	4	0	4	3	693.963	0	843.882	696.541
novel_circ_0003281	2	2	0	0	346.981	344.116	0	0
novel_circ_0003283	4	0	2	3	693.963	0	421.941	696.541
novel_circ_0003290	0	0	2	3	0	0	421.941	696.541
novel_circ_0003292	3	4	7	14	520.472	688.231	1476.79	3250.52
novel_circ_0003295	0	5	3	3	0	860.289	632.911	696.541
novel_circ_0003302	15	20	3	5	2602.36	3441.16	632.911	1160.9
novel_circ_0003310	3	2	0	0	520.472	344.116	0	0
novel_circ_0003318	5	2	0	0	867.453	344.116	0	0
