# Supplementary figures and images for: Identification of Novel Multi-Omics Expression Landscapes and Meta-Analysis of Landscape-Based Competitive Endogenous RNA Networks in ALDH+ Lung Adenocarcinoma Stem Cells
Source: Preprints.org preprint supplement (doi:10.20944/preprints202201.0286.v1), 2022-01-20

# Novel miRNA

First Base Bias

Position Base Bias

■ A ■ U ■ C ■ G

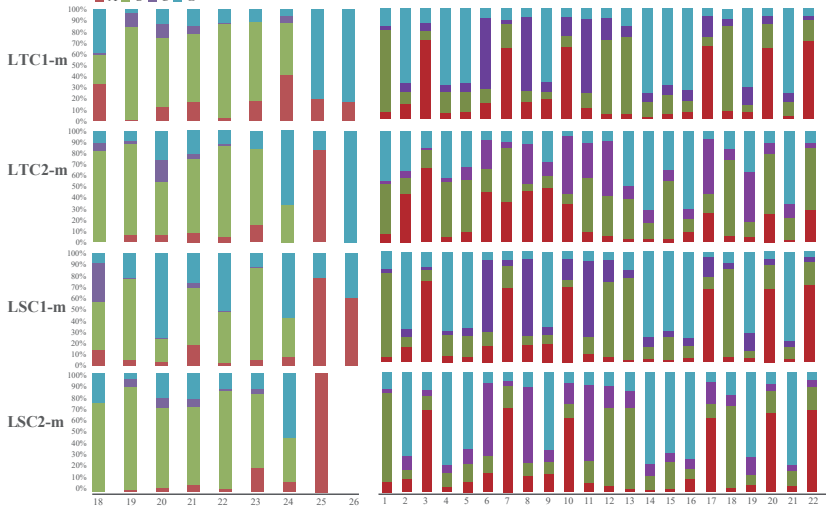

Supplement: Supplementary file 1 [file supplementary]
